# Supplementary material
Source: publisher figshare collection journal article supplement (https://gsajournals.figshare.com/ndownloader/files/18714680)
Supplement: Supplementary file 1 [file 18714680]

## Sheet: Sheet1
Code	Gene_id	CN152_72_readcount(CN152_72vsck)	ck_readcount(CN152_72vsck)	log2FoldChange(CN152_72vsck)	pval(CN152_72vsck)	padj(CN152_72vsck)	significant(CN152_72vsck)	biological_process	biological_process_description	cellular_component	cellular_component_description	molecular_function	molecular_function_description	KEGG AnnotInfo	KEGG url	Gene name	Interpro Description
1	Novel00010	222.473	103.616	1.1024	0.0055269	0.036807	UP	GO:0019954//GO:0000003//GO:0030436//GO:0032502//GO:0008150//GO:0043934	asexual reproduction//reproduction//asexual sporulation//developmental process//biological_process//sporulation	GO:0042763//GO:0044464//GO:0005623//GO:0005575//GO:0042601	intracellular immature spore//cell part//cell//cellular_component//endospore-forming forespore	--	--	--	--	--	PREDICTED: uncharacterized protein LOC102580264 [Solanum tuberosum]
2	Novel00019	131.262	22.8992	2.5191	5.7662e-06	0.00014269	UP	--	--	--	--	GO:0003674//GO:0005515//GO:0005488	molecular_function//protein binding//binding	no KO assigned | (RefSeq) receptor-like protein 12	http://www.genome.jp/dbget-bin/www_bget?sot:102589525	--	PREDICTED: receptor-like protein 12 isoform X5 [Solanum lycopersicum]>gi|723747978|ref|XP_010313801.1| PREDICTED: receptor-like protein 12 isoform X5 [Solanum lycopersicum]
3	Novel00023	56.159	8.70093	2.6903	0.0014166	0.012867	UP	--	--	--	--	--	--	no KO assigned | (RefSeq) uncharacterized LOC102581590	http://www.genome.jp/dbget-bin/www_bget?sot:102581590	--	PREDICTED: uncharacterized protein LOC102602858 [Solanum tuberosum]>gi|565391375|ref|XP_006361398.1| PREDICTED: uncharacterized protein LOC102581590 [Solanum tuberosum]
4	Novel00043	1183.51	432.588	1.452	1.2849e-07	5.3899e-06	UP	GO:0071704//GO:0044260//GO:0008152//GO:0006793//GO:0009987//GO:0006796//GO:0043412//GO:0008150//GO:0043170//GO:0016310//GO:0006464//GO:0044237//GO:0044238//GO:0006468//GO:0036211//GO:0019538//GO:0044267	organic substance metabolic process//cellular macromolecule metabolic process//metabolic process//phosphorus metabolic process//cellular process//phosphate-containing compound metabolic process//macromolecule modification//biological_process//macromolecule metabolic process//phosphorylation//cellular protein modification process//cellular metabolic process//primary metabolic process//protein phos…	--	--	GO:0043167//GO:0003674//GO:0036094//GO:0016301//GO:0032553//GO:0005524//GO:0035639//GO:0032555//GO:0032550//GO:0001871//GO:0097159//GO:1901363//GO:0030554//GO:0003824//GO:0030246//GO:0016740//GO:0097367//GO:1901265//GO:0017076//GO:0043168//GO:0005488//GO:0032559//GO:0032549//GO:0030247//GO:0016773//GO:0000166//GO:0001883//GO:0004672//GO:0001882//GO:0016772	ion binding//molecular_function//small molecule binding//kinase activity//ribonucleotide binding//ATP binding//purine ribonucleoside triphosphate binding//purine ribonucleotide binding//purine ribonucleoside binding//pattern binding//organic cyclic compound binding//heterocyclic compound binding//adenyl nucleotide binding//catalytic activity//carbohydrate binding//transferase activity//carbohydra…	K04733 interleukin-1 receptor-associated kinase 4 [EC:2.7.11.1] | (RefSeq) probable receptor-like protein kinase At1g67000	http://www.genome.jp/dbget-bin/www_bget?sot:102587903	--	PREDICTED: probable receptor-like protein kinase At1g67000 [Solanum lycopersicum]
5	Novel00082	1693.31	728.126	1.2176	3.9542e-05	0.00070396	UP	--	--	--	--	--	--	K02866 large subunit ribosomal protein L10e | (RefSeq) 60S ribosomal protein L10-like	http://www.genome.jp/dbget-bin/www_bget?sot:102582711	--	60S ribosomal protein L10 [Solanum lycopersicum]>gi|68449756|gb|AAY97865.1| 60S ribosomal protein L10 [Solanum lycopersicum]
6	Novel00112	538.598	245.132	1.1356	0.0014287	0.012961	UP	--	--	--	--	--	--	no KO assigned | (RefSeq) probable disease resistance protein At1g61310	http://www.genome.jp/dbget-bin/www_bget?sot:102600040	--	PREDICTED: uncharacterized protein LOC102600040 isoform X2 [Solanum tuberosum]
7	Novel00158	116.492	43.6108	1.4175	0.0072612	0.045137	UP	--	--	--	--	GO:0005488//GO:0005515//GO:0003674	binding//protein binding//molecular_function	no KO assigned | (RefSeq) uncharacterized LOC102590186	http://www.genome.jp/dbget-bin/www_bget?sot:102590186	--	PREDICTED: topless-related protein 1-like isoform X1 [Solanum tuberosum]
8	Novel00214	202.046	52.8791	1.9339	0.00042265	0.0049034	UP	--	--	--	--	--	--	K10406 kinesin family member C2/C3 | (RefSeq) kinesin-related protein 3-like	http://www.genome.jp/dbget-bin/www_bget?sot:102579723	--	PREDICTED: uncharacterized protein LOC102579723 [Solanum tuberosum]
9	Novel00583	140.263	31.1912	2.1689	0.00013174	0.0019136	UP	--	--	--	--	GO:1901363//GO:0003676//GO:0003824//GO:0030554//GO:0097159//GO:0005524//GO:0032553//GO:0032555//GO:0035639//GO:0016787//GO:0032550//GO:0043167//GO:0036094//GO:0003674//GO:0000166//GO:0003677//GO:0001883//GO:0001882//GO:0043168//GO:0005488//GO:0032549//GO:0032559//GO:0097367//GO:1901265//GO:0017076	heterocyclic compound binding//nucleic acid binding//catalytic activity//adenyl nucleotide binding//organic cyclic compound binding//ATP binding//ribonucleotide binding//purine ribonucleotide binding//purine ribonucleoside triphosphate binding//hydrolase activity//purine ribonucleoside binding//ion binding//small molecule binding//molecular_function//nucleotide binding//DNA binding//purine nucleo…	K10742 DNA replication ATP-dependent helicase Dna2 [EC:3.6.4.12] | (RefSeq) DNA replication ATP-dependent helicase/nuclease DNA2	http://www.genome.jp/dbget-bin/www_bget?sot:102578342	--	PREDICTED: DNA replication ATP-dependent helicase/nuclease DNA2-like [Solanum tuberosum]
10	Novel00631	83.2298	17.8312	2.2227	0.0010143	0.0098941	UP	--	--	--	--	GO:0003674//GO:0045735	molecular_function//nutrient reservoir activity	no KO assigned | (RefSeq) germin-like protein subfamily 1 member 13	http://www.genome.jp/dbget-bin/www_bget?sot:102599490	--	PREDICTED: germin-like protein subfamily 1 member 13-like [Solanum tuberosum]
11	Novel00663	52.8885	8.33283	2.6661	0.0022816	0.018763	UP	--	--	--	--	--	--	--	--	--	--
12	Novel00712	75.9308	19.7044	1.9462	0.0030711	0.023456	UP	--	--	--	--	GO:0005488//GO:0046872//GO:0046914//GO:0043169//GO:0008270//GO:0003674//GO:0043167//GO:1901363//GO:0003676//GO:0097159	binding//metal ion binding//transition metal ion binding//cation binding//zinc ion binding//molecular_function//ion binding//heterocyclic compound binding//nucleic acid binding//organic cyclic compound binding	--	--	--	PREDICTED: uncharacterized protein LOC104089897 [Nicotiana tomentosiformis]
13	Novel00782	23.3427	0	Inf	0.00058879	0.0063827	UP	--	--	--	--	--	--	--	--	--	PREDICTED: cysteine-rich and transmembrane domain-containing protein A [Nicotiana sylvestris]
14	Novel00899	647.121	260.815	1.311	0.0035663	0.02633	UP	GO:0051234//GO:0006810//GO:0008150//GO:0051179	establishment of localization//transport//biological_process//localization	GO:0016020//GO:0005575	membrane//cellular_component	GO:0003674//GO:0005215	molecular_function//transporter activity	K14638 solute carrier family 15 (peptide/histidine transporter), member 3/4 | (RefSeq) protein NRT1/ PTR FAMILY 2.3-like	http://www.genome.jp/dbget-bin/www_bget?sot:102582054	--	PREDICTED: probable nitrate excretion transporter 3-like [Solanum tuberosum]
15	Novel00931	113.335	4.12647	4.7795	8.7615e-11	8.113e-09	UP	--	--	--	--	--	--	no KO assigned | (RefSeq) uncharacterized LOC102605651	http://www.genome.jp/dbget-bin/www_bget?sot:102605651	--	PREDICTED: uncharacterized protein LOC102605651 [Solanum tuberosum]
16	Novel00932	82.4399	7.64156	3.4314	5.249e-06	0.00013116	UP	GO:0030001//GO:0006810//GO:0051234//GO:0008150//GO:0006816//GO:0051179//GO:0070838//GO:0006811//GO:0006812//GO:0072511	metal ion transport//transport//establishment of localization//biological_process//calcium ion transport//localization//divalent metal ion transport//ion transport//cation transport//divalent inorganic cation transport	GO:0016020//GO:0005575	membrane//cellular_component	GO:0030234//GO:0016247//GO:0003674//GO:0042030//GO:0060590//GO:0060589//GO:0098772//GO:0005246//GO:0004857	enzyme regulator activity//channel regulator activity//molecular_function//ATPase inhibitor activity//ATPase regulator activity//nucleoside-triphosphatase regulator activity//molecular function regulator//calcium channel regulator activity//enzyme inhibitor activity	no KO assigned | (RefSeq) uncharacterized LOC102606324	http://www.genome.jp/dbget-bin/www_bget?sot:102606324	--	PREDICTED: uncharacterized protein LOC102606324 [Solanum tuberosum]
17	Novel01063	39.1083	1.03084	5.2456	0.00027252	0.0034465	UP	GO:0023052//GO:0050789//GO:0042221//GO:0008150//GO:0040011//GO:0009987//GO:0050794//GO:0050896//GO:0065007//GO:0007165//GO:0042330//GO:0006935//GO:0051716//GO:0009605//GO:0007154	signaling//regulation of biological process//response to chemical//biological_process//locomotion//cellular process//regulation of cellular process//response to stimulus//biological regulation//signal transduction//taxis//chemotaxis//cellular response to stimulus//response to external stimulus//cell communication	GO:0016020//GO:0005575	membrane//cellular_component	GO:0038023//GO:0003674//GO:0060089//GO:0004871//GO:0004888	signaling receptor activity//molecular_function//molecular transducer activity//obsolete signal transducer activity//transmembrane signaling receptor activity	--	--	--	--
18	Novel01092	78.2414	11.64	2.7488	0.00011648	0.0017401	UP	GO:0071704//GO:0044260//GO:0008152//GO:0006793//GO:0009987//GO:0006796//GO:0043412//GO:0008150//GO:0043170//GO:0016310//GO:0006464//GO:0044237//GO:0006468//GO:0044238//GO:0036211//GO:0019538//GO:0044267	organic substance metabolic process//cellular macromolecule metabolic process//metabolic process//phosphorus metabolic process//cellular process//phosphate-containing compound metabolic process//macromolecule modification//biological_process//macromolecule metabolic process//phosphorylation//cellular protein modification process//cellular metabolic process//protein phosphorylation//primary metabo…	GO:0032991//GO:0005575//GO:0033588//GO:0044424//GO:0044464//GO:0005622//GO:0005623	protein-containing complex//cellular_component//Elongator holoenzyme complex//intracellular part//cell part//intracellular//cell	GO:0043167//GO:0003674//GO:0036094//GO:0016301//GO:0032553//GO:0005524//GO:0035639//GO:0032555//GO:0032550//GO:0097159//GO:1901363//GO:0030554//GO:0003824//GO:0016740//GO:0097367//GO:1901265//GO:0017076//GO:0043168//GO:0005488//GO:0032559//GO:0032549//GO:0016773//GO:0000166//GO:0001883//GO:0004672//GO:0001882//GO:0016772	ion binding//molecular_function//small molecule binding//kinase activity//ribonucleotide binding//ATP binding//purine ribonucleoside triphosphate binding//purine ribonucleotide binding//purine ribonucleoside binding//organic cyclic compound binding//heterocyclic compound binding//adenyl nucleotide binding//catalytic activity//transferase activity//carbohydrate derivative binding//nucleoside phosp…	no KO assigned | (RefSeq) leucine-rich repeat receptor-like tyrosine-protein kinase PXC3	http://www.genome.jp/dbget-bin/www_bget?sot:102580416	--	PREDICTED: leucine-rich repeat receptor-like tyrosine-protein kinase At2g41820-like [Solanum tuberosum]
19	Novel01094	137.609	35.0734	1.9721	0.00017384	0.0023983	UP	GO:0044237//GO:0006464//GO:0016310//GO:0043170//GO:0044267//GO:0019538//GO:0036211//GO:0006468//GO:0044238//GO:0006793//GO:0008152//GO:0044260//GO:0071704//GO:0008150//GO:0043412//GO:0006796//GO:0009987	cellular metabolic process//cellular protein modification process//phosphorylation//macromolecule metabolic process//cellular protein metabolic process//protein metabolic process//protein modification process//protein phosphorylation//primary metabolic process//phosphorus metabolic process//metabolic process//cellular macromolecule metabolic process//organic substance metabolic process//biologica…	--	--	GO:0032559//GO:0032549//GO:0005488//GO:0043168//GO:0017076//GO:1901265//GO:0097367//GO:0016772//GO:0001882//GO:0004672//GO:0001883//GO:0000166//GO:0016773//GO:0032550//GO:0032555//GO:0035639//GO:0005524//GO:0032553//GO:0016301//GO:0036094//GO:0003674//GO:0043167//GO:0016740//GO:0030554//GO:0003824//GO:1901363//GO:0097159	adenyl ribonucleotide binding//ribonucleoside binding//binding//anion binding//purine nucleotide binding//nucleoside phosphate binding//carbohydrate derivative binding//transferase activity, transferring phosphorus-containing groups//nucleoside binding//protein kinase activity//purine nucleoside binding//nucleotide binding//phosphotransferase activity, alcohol group as acceptor//purine ribonucleo…	no KO assigned | (RefSeq) leucine-rich repeat receptor-like tyrosine-protein kinase PXC3	http://www.genome.jp/dbget-bin/www_bget?sot:102580416	--	PREDICTED: leucine-rich repeat receptor-like tyrosine-protein kinase At2g41820-like [Solanum tuberosum]
20	Novel01120	172.248	56.7724	1.6012	0.00042378	0.0049127	UP	GO:0043603//GO:0051179//GO:0010467//GO:0009058//GO:0019538//GO:0006807//GO:0044238//GO:0007165//GO:0006412//GO:0034641//GO:0065007//GO:0050794//GO:0050896//GO:0044267//GO:0007218//GO:0009059//GO:0007154//GO:0043170//GO:0044271//GO:0007186//GO:0055085//GO:0043043//GO:0006812//GO:0044237//GO:0051716//GO:0006811//GO:0009987//GO:1901566//GO:0050789//GO:0044249//GO:1901564//GO:0008150//GO:0051234//GO:…	cellular amide metabolic process//localization//gene expression//biosynthetic process//protein metabolic process//nitrogen compound metabolic process//primary metabolic process//signal transduction//translation//cellular nitrogen compound metabolic process//biological regulation//regulation of cellular process//response to stimulus//cellular protein metabolic process//neuropeptide signaling pathw…	GO:0005576//GO:0005622//GO:0044464//GO:0015934//GO:0043228//GO:0005623//GO:0044444//GO:0044446//GO:0043229//GO:0044422//GO:0043232//GO:0044391//GO:0044424//GO:0043226//GO:0005575//GO:0032991//GO:0016020//GO:0005840//GO:0005737	extracellular region//intracellular//cell part//large ribosomal subunit//non-membrane-bounded organelle//cell//cytoplasmic part//intracellular organelle part//intracellular organelle//organelle part//intracellular non-membrane-bounded organelle//ribosomal subunit//intracellular part//organelle//cellular_component//protein-containing complex//membrane//ribosome//cytoplasm	GO:0005215//GO:0005515//GO:0003723//GO:0046873//GO:0005184//GO:0022890//GO:0008324//GO:0005179//GO:0015075//GO:0005488//GO:0008013//GO:0003735//GO:0097159//GO:0005198//GO:0022857//GO:1901363//GO:0005102//GO:0003676//GO:0003674	transporter activity//protein binding//RNA binding//metal ion transmembrane transporter activity//neuropeptide hormone activity//inorganic cation transmembrane transporter activity//cation transmembrane transporter activity//hormone activity//ion transmembrane transporter activity//binding//beta-catenin binding//structural constituent of ribosome//organic cyclic compound binding//structural molec…	--	--	--	PREDICTED: uncharacterized protein LOC104647107 [Solanum lycopersicum]
21	Novel01150	153.611	61.1761	1.3282	0.0053295	0.035836	UP	--	--	--	--	--	--	no KO assigned | (RefSeq) uncharacterized LOC102600430	http://www.genome.jp/dbget-bin/www_bget?sot:102600430	--	PREDICTED: uncharacterized protein LOC102600430 [Solanum tuberosum]
22	Novel01157	82.6995	4.37286	4.2412	3.7808e-07	1.3526e-05	UP	--	--	--	--	--	--	--	--	--	--
23	Novel01169	283.509	82.1639	1.7868	0.00051606	0.0057464	UP	GO:0008152//GO:0008150//GO:0055114	metabolic process//biological_process//oxidation-reduction process	--	--	GO:0003674//GO:0003824//GO:0016491	molecular_function//catalytic activity//oxidoreductase activity	K06892 feruloyl-CoA ortho-hydroxylase [EC:1.14.11.-] | (RefSeq) feruloyl CoA ortho-hydroxylase 1-like	http://www.genome.jp/dbget-bin/www_bget?sot:102590254	--	PREDICTED: feruloyl CoA ortho-hydroxylase 2-like [Solanum lycopersicum]
24	Novel01204	399.058	166.494	1.2611	0.00020123	0.0026966	UP	--	--	--	--	GO:0003674//GO:0005515//GO:0005488	molecular_function//protein binding//binding	K12742 isoprene synthase [EC:4.2.3.27] | (RefSeq) (-)-camphene/tricyclene synthase, chloroplastic-like	http://www.genome.jp/dbget-bin/www_bget?sot:102602070	--	Late blight resistance protein, putative [Solanum demissum]
25	Novel01271	153.458	65.4439	1.2295	0.0080892	0.048798	UP	--	--	--	--	--	--	no KO assigned | (RefSeq) uncharacterized LOC102580802	http://www.genome.jp/dbget-bin/www_bget?sot:102580802	--	PREDICTED: uncharacterized protein LOC104093903 [Nicotiana tomentosiformis]
26	Novel01273	37.4527	3.05097	3.6177	0.0011994	0.011278	UP	GO:0019835//GO:0009987//GO:0051818//GO:0001906//GO:0008150//GO:0044364//GO:0001897//GO:0051817//GO:0015074//GO:0065008//GO:0044260//GO:0006725//GO:0044003//GO:0071704//GO:0051715//GO:0019836//GO:0001907//GO:0008152//GO:0044179//GO:0051883//GO:0051801//GO:0006807//GO:0090304//GO:0044764//GO:0046483//GO:0044238//GO:0065007//GO:0031640//GO:0006259//GO:0035821//GO:0034641//GO:0044419//GO:0050896//GO:…	cytolysis//cellular process//disruption of cells of other organism involved in symbiotic interaction//cell killing//biological_process//disruption of cells of other organism//cytolysis by symbiont of host cells//modification of morphology or physiology of other organism involved in symbiotic interaction//DNA integration//regulation of biological quality//cellular macromolecule metabolic process//…	GO:0005575//GO:0016020//GO:0005576//GO:0031224//GO:0016021//GO:0044425	cellular_component//membrane//extracellular region//intrinsic component of membrane//integral component of membrane//membrane part	GO:0003674//GO:0038023//GO:0004896//GO:0060089//GO:0004888//GO:0004871	molecular_function//signaling receptor activity//cytokine receptor activity//molecular transducer activity//transmembrane signaling receptor activity//obsolete signal transducer activity	no KO assigned | (RefSeq) potassium channel SKOR-like	http://www.genome.jp/dbget-bin/www_bget?sot:102604369	--	PREDICTED: uncharacterized protein LOC101248883 [Solanum lycopersicum]
27	Novel01284	1553.83	741.027	1.0682	6.3457e-05	0.0010544	UP	GO:0071704//GO:0006725//GO:0044260//GO:0008152//GO:0006396//GO:0009987//GO:0008033//GO:0034660//GO:0008150//GO:0043170//GO:0006399//GO:0044237//GO:0006139//GO:1901360//GO:0044238//GO:0046483//GO:0090304//GO:0010467//GO:0006807//GO:0034470//GO:0034641//GO:0016070	organic substance metabolic process//cellular aromatic compound metabolic process//cellular macromolecule metabolic process//metabolic process//RNA processing//cellular process//tRNA processing//ncRNA metabolic process//biological_process//macromolecule metabolic process//tRNA metabolic process//cellular metabolic process//nucleobase-containing compound metabolic process//organic cyclic compound …	GO:0016020//GO:0005575//GO:0016021//GO:0044425//GO:0031224	membrane//cellular_component//integral component of membrane//membrane part//intrinsic component of membrane	GO:0008168//GO:0003674//GO:0016741//GO:0003824//GO:0016740	methyltransferase activity//molecular_function//transferase activity, transferring one-carbon groups//catalytic activity//transferase activity	no KO assigned | (RefSeq) purine permease 1-like	http://www.genome.jp/dbget-bin/www_bget?sot:102581812	--	PREDICTED: purine permease 1-like [Solanum tuberosum]
28	Novel01411	59.7068	12.2609	2.2838	0.0035934	0.026445	UP	--	--	--	--	--	--	no KO assigned | (RefSeq) TMV resistance protein N-like	http://www.genome.jp/dbget-bin/www_bget?sot:102593347	--	PREDICTED: TMV resistance protein N-like [Solanum tuberosum]
29	Novel01533	829.287	226.479	1.8725	4.5729e-10	3.5898e-08	UP	GO:0008152//GO:0006793//GO:0071704//GO:0044260//GO:0043412//GO:0008150//GO:0009987//GO:0006796//GO:0044237//GO:0016310//GO:0043170//GO:0006464//GO:0044267//GO:0044238//GO:0006468//GO:0036211//GO:0019538	metabolic process//phosphorus metabolic process//organic substance metabolic process//cellular macromolecule metabolic process//macromolecule modification//biological_process//cellular process//phosphate-containing compound metabolic process//cellular metabolic process//phosphorylation//macromolecule metabolic process//cellular protein modification process//cellular protein metabolic process//pri…	--	--	GO:0032553//GO:0005524//GO:0016301//GO:0032550//GO:0035639//GO:0032555//GO:0043167//GO:0003674//GO:0036094//GO:0030554//GO:0003824//GO:1901363//GO:0016740//GO:0097159//GO:0043168//GO:0032559//GO:0032549//GO:0005488//GO:1901265//GO:0097367//GO:0017076//GO:0001883//GO:0000166//GO:0001882//GO:0016772//GO:0004672//GO:0016773	ribonucleotide binding//ATP binding//kinase activity//purine ribonucleoside binding//purine ribonucleoside triphosphate binding//purine ribonucleotide binding//ion binding//molecular_function//small molecule binding//adenyl nucleotide binding//catalytic activity//heterocyclic compound binding//transferase activity//organic cyclic compound binding//anion binding//adenyl ribonucleotide binding//rib…	K04733 interleukin-1 receptor-associated kinase 4 [EC:2.7.11.1] | (RefSeq) probable receptor-like protein kinase At5g39020	http://www.genome.jp/dbget-bin/www_bget?sot:102603052	--	PREDICTED: probable receptor-like protein kinase At5g39020 [Nicotiana tomentosiformis]
30	Novel01594	146.149	52.0248	1.4902	0.0023767	0.019349	UP	GO:0008150//GO:0032502//GO:0009987//GO:0008152//GO:0000746//GO:0015074//GO:0044260//GO:0006725//GO:0071704//GO:0006259//GO:0034641//GO:0006807//GO:0090304//GO:0007275//GO:0046483//GO:0044238//GO:0044764//GO:0006139//GO:1901360//GO:0044237//GO:0051704//GO:0032501//GO:0043170	biological_process//developmental process//cellular process//metabolic process//conjugation//DNA integration//cellular macromolecule metabolic process//cellular aromatic compound metabolic process//organic substance metabolic process//DNA metabolic process//cellular nitrogen compound metabolic process//nitrogen compound metabolic process//nucleic acid metabolic process//multicellular organism dev…	GO:0005575//GO:0005576	cellular_component//extracellular region	GO:0005102//GO:0003676//GO:1901363//GO:0097159//GO:0008270//GO:0003674//GO:0043167//GO:0005179//GO:0005515//GO:0046914//GO:0043169//GO:0005488//GO:0046872	signaling receptor binding//nucleic acid binding//heterocyclic compound binding//organic cyclic compound binding//zinc ion binding//molecular_function//ion binding//hormone activity//protein binding//transition metal ion binding//cation binding//binding//metal ion binding	K00927 phosphoglycerate kinase [EC:2.7.2.3] | (RefSeq) phosphoglycerate kinase, chloroplastic	http://www.genome.jp/dbget-bin/www_bget?sot:102577647	--	putative polyprotein [Solanum lycopersicum]
31	Novel01639	162.112	11.787	3.7817	0.0029464	0.022707	UP	GO:0008150//GO:0043412//GO:0006796//GO:0009987//GO:0006793//GO:0008152//GO:0044260//GO:0071704//GO:0044267//GO:0019538//GO:0006468//GO:0044238//GO:0036211//GO:0044237//GO:0006464//GO:0016310//GO:0043170	biological_process//macromolecule modification//phosphate-containing compound metabolic process//cellular process//phosphorus metabolic process//metabolic process//cellular macromolecule metabolic process//organic substance metabolic process//cellular protein metabolic process//protein metabolic process//protein phosphorylation//primary metabolic process//protein modification process//cellular me…	--	--	GO:0016740//GO:0003824//GO:0030554//GO:1901363//GO:0097159//GO:0032550//GO:0035639//GO:0032555//GO:0032553//GO:0005524//GO:0016301//GO:0003674//GO:0036094//GO:0043167//GO:0001882//GO:0016772//GO:0004672//GO:0001883//GO:0000166//GO:0016773//GO:0032549//GO:0032559//GO:0005488//GO:0043168//GO:0017076//GO:1901265//GO:0097367	transferase activity//catalytic activity//adenyl nucleotide binding//heterocyclic compound binding//organic cyclic compound binding//purine ribonucleoside binding//purine ribonucleoside triphosphate binding//purine ribonucleotide binding//ribonucleotide binding//ATP binding//kinase activity//molecular_function//small molecule binding//ion binding//nucleoside binding//transferase activity, transfe…	--	--	--	PREDICTED: probable LRR receptor-like serine/threonine-protein kinase At1g07650-like [Solanum tuberosum]
32	Novel01671	756.431	316.42	1.2574	0.0014651	0.013236	UP	--	--	--	--	--	--	no KO assigned | (RefSeq) uncharacterized LOC102605469	http://www.genome.jp/dbget-bin/www_bget?sot:102605469	--	PREDICTED: uncharacterized protein LOC102605469 [Solanum tuberosum]
33	Novel01747	146.743	42.7412	1.7796	0.00032382	0.0039596	UP	--	--	GO:0019867//GO:0005575//GO:0016020	outer membrane//cellular_component//membrane	GO:0005515//GO:0005488//GO:0003674	protein binding//binding//molecular_function	no KO assigned | (RefSeq) uncharacterized LOC102590186	http://www.genome.jp/dbget-bin/www_bget?sot:102590186	--	PREDICTED: topless-related protein 1-like isoform X1 [Solanum tuberosum]
34	Novel01788	2385.9	585.552	2.0267	1.4467e-05	0.00031241	UP	--	--	--	--	GO:0003674//GO:0005488//GO:0005515	molecular_function//binding//protein binding	no KO assigned | (RefSeq) uncharacterized LOC102600894	http://www.genome.jp/dbget-bin/www_bget?sot:102600894	--	PREDICTED: uncharacterized protein LOC102600894 [Solanum tuberosum]
35	Novel01804	135.536	3.90551	5.117	0.00074798	0.0077356	UP	--	--	--	--	--	--	--	--	--	--
36	Novel01816	148.665	43.1964	1.7831	0.004483	0.031467	UP	--	--	GO:0016021//GO:0044425//GO:0031224//GO:0005575//GO:0016020	integral component of membrane//membrane part//intrinsic component of membrane//cellular_component//membrane	--	--	K15382 solute carrier family 50 (sugar transporter) | (RefSeq) bidirectional sugar transporter SWEET10-like	http://www.genome.jp/dbget-bin/www_bget?sot:102580855	--	PREDICTED: uncharacterized protein LOC101265905 [Solanum lycopersicum]
37	Novel01826	182.179	53.4775	1.7684	0.00011777	0.0017525	UP	--	--	--	--	--	--	--	--	--	--
38	Novel01839	618.405	297.32	1.0565	0.00037635	0.0044756	UP	--	--	--	--	--	--	no KO assigned | (RefSeq) uncharacterized LOC102597226	http://www.genome.jp/dbget-bin/www_bget?sot:102597226	--	PREDICTED: uncharacterized protein LOC102597226 isoform X2 [Solanum tuberosum]
39	Novel01853	3921.11	1769.69	1.1478	3.3303e-06	8.8933e-05	UP	GO:0051234//GO:0006810//GO:0008150//GO:0051179	establishment of localization//transport//biological_process//localization	GO:0016020//GO:0005575	membrane//cellular_component	GO:0003674//GO:0005215	molecular_function//transporter activity	no KO assigned | (RefSeq) metal transporter Nramp6	http://www.genome.jp/dbget-bin/www_bget?sot:102594505	--	PREDICTED: LOW QUALITY PROTEIN: metal transporter Nramp1-like [Solanum tuberosum]
40	Novel01866	1293.18	605.176	1.0955	7.1015e-05	0.0011607	UP	--	--	--	--	--	--	no KO assigned | (RefSeq) carbon catabolite repressor protein 4 homolog 3-like	http://www.genome.jp/dbget-bin/www_bget?sot:102601555	--	PREDICTED: carbon catabolite repressor protein 4 homolog 3-like isoform X1 [Nicotiana sylvestris]
41	Novel01878	961.32	109.632	3.1323	0.00016895	0.0023475	UP	GO:0008152//GO:0008150	metabolic process//biological_process	--	--	GO:0016791//GO:0003674//GO:0016787//GO:0016788//GO:0003824//GO:0042578	phosphatase activity//molecular_function//hydrolase activity//hydrolase activity, acting on ester bonds//catalytic activity//phosphoric ester hydrolase activity	K13248 pyridoxal phosphate phosphatase PHOSPHO2 [EC:3.1.3.74] | (RefSeq) inorganic pyrophosphatase 1-like	http://www.genome.jp/dbget-bin/www_bget?sot:102594841	--	PREDICTED: inorganic pyrophosphatase 1-like [Solanum tuberosum]
42	Novel01879	36.6805	2.56736	3.8367	0.0010779	0.010379	UP	GO:0008150//GO:0008152	biological_process//metabolic process	--	--	GO:0042578//GO:0003677//GO:0005488//GO:0097159//GO:0016788//GO:0003824//GO:0003676//GO:1901363//GO:0003674//GO:0016791//GO:0016787	phosphoric ester hydrolase activity//DNA binding//binding//organic cyclic compound binding//hydrolase activity, acting on ester bonds//catalytic activity//nucleic acid binding//heterocyclic compound binding//molecular_function//phosphatase activity//hydrolase activity	K13248 pyridoxal phosphate phosphatase PHOSPHO2 [EC:3.1.3.74] | (RefSeq) inorganic pyrophosphatase 1-like	http://www.genome.jp/dbget-bin/www_bget?sot:102594183	--	PREDICTED: inorganic pyrophosphatase 1-like [Solanum tuberosum]
43	Novel01918	726.646	226.85	1.6795	3.9398e-08	1.9317e-06	UP	--	--	--	--	--	--	no KO assigned | (RefSeq) probable plastid-lipid-associated protein 13, chloroplastic	http://www.genome.jp/dbget-bin/www_bget?sot:102601712	--	PREDICTED: probable plastid-lipid-associated protein 13, chloroplastic isoform X1 [Solanum lycopersicum]
44	Novel01925	1857.92	877.667	1.0819	3.778e-05	0.00067907	UP	GO:0034220//GO:0003333//GO:0071702//GO:0046942//GO:0009987//GO:0071705//GO:0008150//GO:0051234//GO:0006810//GO:0015849//GO:0006811//GO:0015711//GO:0055085//GO:0006865//GO:0006820//GO:1903825//GO:0051179//GO:0098656	ion transmembrane transport//amino acid transmembrane transport//organic substance transport//carboxylic acid transport//cellular process//nitrogen compound transport//biological_process//establishment of localization//transport//organic acid transport//ion transport//organic anion transport//transmembrane transport//amino acid transport//anion transport//organic acid transmembrane transport//loc…	--	--	--	--	no KO assigned | (RefSeq) ycf20-like protein	http://www.genome.jp/dbget-bin/www_bget?sot:102602176	--	PREDICTED: ycf20-like protein-like isoform X1 [Solanum tuberosum]>gi|565371098|ref|XP_006352148.1| PREDICTED: ycf20-like protein-like isoform X2 [Solanum tuberosum]>gi|565371100|ref|XP_006352149.1| PREDICTED: ycf20-like protein-like isoform X3 [Solanum tuberosum]
45	Novel01934	2219.19	950.901	1.2227	2.2444e-06	6.3604e-05	UP	--	--	--	--	--	--	--	--	--	--
46	Novel02047	1599.65	679.141	1.236	3.183e-06	8.5382e-05	UP	GO:0009987//GO:0006281//GO:0006298//GO:0033554//GO:0008150//GO:0006725//GO:0071704//GO:0044260//GO:0008152//GO:0090304//GO:0044238//GO:0046483//GO:0006807//GO:0050896//GO:0006259//GO:0034641//GO:0043170//GO:0006950//GO:0006974//GO:0051716//GO:0044237//GO:0006139//GO:1901360	cellular process//DNA repair//mismatch repair//cellular response to stress//biological_process//cellular aromatic compound metabolic process//organic substance metabolic process//cellular macromolecule metabolic process//metabolic process//nucleic acid metabolic process//primary metabolic process//heterocycle metabolic process//nitrogen compound metabolic process//response to stimulus//DNA metabo…	--	--	GO:0097159//GO:0030554//GO:0003676//GO:1901363//GO:0003690//GO:0043167//GO:0003674//GO:0036094//GO:0032553//GO:0005524//GO:0032550//GO:0035639//GO:0032555//GO:0001883//GO:0000166//GO:0003677//GO:0001882//GO:1901265//GO:0097367//GO:0017076//GO:0043168//GO:0032549//GO:0032559//GO:0030983//GO:0005488	organic cyclic compound binding//adenyl nucleotide binding//nucleic acid binding//heterocyclic compound binding//double-stranded DNA binding//ion binding//molecular_function//small molecule binding//ribonucleotide binding//ATP binding//purine ribonucleoside binding//purine ribonucleoside triphosphate binding//purine ribonucleotide binding//purine nucleoside binding//nucleotide binding//DNA bindin…	no KO assigned | (RefSeq) protein trichome birefringence-like 42	http://www.genome.jp/dbget-bin/www_bget?sot:102598428	--	PREDICTED: protein trichome birefringence-like 42 [Nicotiana sylvestris]
47	Novel02175	92.4496	21.9993	2.0712	0.00085688	0.008632	UP	GO:0071840//GO:0022607//GO:0006996//GO:0016043//GO:0097031//GO:0032981//GO:0065003//GO:0044085//GO:0043933//GO:0007005//GO:0034622//GO:0033108//GO:0009987//GO:0008150//GO:0010257//GO:0070271	cellular component organization or biogenesis//cellular component assembly//organelle organization//cellular component organization//obsolete mitochondrial respiratory chain complex I biogenesis//mitochondrial respiratory chain complex I assembly//protein-containing complex assembly//cellular component biogenesis//protein-containing complex subunit organization//mitochondrion organization//cellul…	--	--	--	--	no KO assigned | (RefSeq) uncharacterized LOC102600786	http://www.genome.jp/dbget-bin/www_bget?sot:102600786	--	PREDICTED: uncharacterized protein LOC102600786 isoform X1 [Solanum tuberosum]>gi|565357876|ref|XP_006345756.1| PREDICTED: uncharacterized protein LOC102600786 isoform X2 [Solanum tuberosum]
48	Novel02197	215.323	87.7738	1.2946	0.0015377	0.013761	UP	GO:0044249//GO:0008150//GO:0006796//GO:0008610//GO:0019637//GO:0009987//GO:0006793//GO:0008152//GO:1901576//GO:0071704//GO:0090407//GO:0006629//GO:0009058//GO:0044238//GO:0044237//GO:0008654//GO:0006644//GO:0044255	cellular biosynthetic process//biological_process//phosphate-containing compound metabolic process//lipid biosynthetic process//organophosphate metabolic process//cellular process//phosphorus metabolic process//metabolic process//organic substance biosynthetic process//organic substance metabolic process//organophosphate biosynthetic process//lipid metabolic process//biosynthetic process//primary…	GO:0005575//GO:0016020	cellular_component//membrane	GO:0016740//GO:0003824//GO:0004143//GO:0016301//GO:0003674//GO:0016772//GO:0016773	transferase activity//catalytic activity//diacylglycerol kinase activity//kinase activity//molecular_function//transferase activity, transferring phosphorus-containing groups//phosphotransferase activity, alcohol group as acceptor	--	--	--	--
49	Novel02249	86.2384	25.0625	1.7828	0.0052182	0.035374	UP	GO:0032268//GO:0006265//GO:0006451//GO:0009059//GO:0043170//GO:0019222//GO:0006417//GO:1901360//GO:0006139//GO:0044271//GO:0043043//GO:0044237//GO:0010467//GO:0006996//GO:0071840//GO:0043603//GO:0006807//GO:0019538//GO:0009058//GO:0044238//GO:0046483//GO:0006412//GO:0090304//GO:0016043//GO:0034641//GO:0006259//GO:0071103//GO:0065007//GO:0006414//GO:0034248//GO:0010468//GO:0044267//GO:0050794//GO:…	regulation of cellular protein metabolic process//DNA topological change//translational readthrough//macromolecule biosynthetic process//macromolecule metabolic process//regulation of metabolic process//regulation of translation//organic cyclic compound metabolic process//nucleobase-containing compound metabolic process//cellular nitrogen compound biosynthetic process//peptide biosynthetic proces…	GO:0016021//GO:0031226//GO:0044424//GO:0044425//GO:0005622//GO:0044464//GO:0031224//GO:0005623//GO:0005575//GO:0005886//GO:0016020//GO:0005887//GO:0005737//GO:0071944//GO:0044459	integral component of membrane//intrinsic component of plasma membrane//intracellular part//membrane part//intracellular//cell part//intrinsic component of membrane//cell//cellular_component//plasma membrane//membrane//integral component of plasma membrane//cytoplasm//cell periphery//plasma membrane part	GO:0003918//GO:0017076//GO:0097367//GO:1901265//GO:0042623//GO:0005488//GO:0061505//GO:0032549//GO:0016817//GO:0032559//GO:0008094//GO:0043168//GO:0003723//GO:0017111//GO:0032561//GO:0001882//GO:0016887//GO:0000166//GO:0003677//GO:0005525//GO:0001883//GO:0003916//GO:0003674//GO:0036094//GO:0016818//GO:0043167//GO:0035639//GO:0032555//GO:0016853//GO:0032550//GO:0016787//GO:0032553//GO:0005524//GO:…	DNA topoisomerase type II (ATP-hydrolyzing) activity//purine nucleotide binding//carbohydrate derivative binding//nucleoside phosphate binding//ATPase activity, coupled//binding//DNA topoisomerase II activity//ribonucleoside binding//hydrolase activity, acting on acid anhydrides//adenyl ribonucleotide binding//DNA-dependent ATPase activity//anion binding//RNA binding//nucleoside-triphosphatase ac…	no KO assigned | (RefSeq) HORMA domain-containing protein 1-like	http://www.genome.jp/dbget-bin/www_bget?sot:102591962	--	PREDICTED: HORMA domain-containing protein 1-like [Solanum tuberosum]
50	Novel02261	63.298	3.54697	4.1575	0.000231	0.0030183	UP	--	--	--	--	--	--	--	--	--	--
51	Novel02268	110.179	27.0737	2.0249	0.00038449	0.0045552	UP	GO:0043170//GO:0016310//GO:0006464//GO:0044237//GO:0044238//GO:0006468//GO:0036211//GO:0019538//GO:0044267//GO:0071704//GO:0044260//GO:0008152//GO:0006793//GO:0009987//GO:0006796//GO:0043412//GO:0008150	macromolecule metabolic process//phosphorylation//cellular protein modification process//cellular metabolic process//primary metabolic process//protein phosphorylation//protein modification process//protein metabolic process//cellular protein metabolic process//organic substance metabolic process//cellular macromolecule metabolic process//metabolic process//phosphorus metabolic process//cellular …	--	--	GO:0097367//GO:1901265//GO:0017076//GO:0043168//GO:0005488//GO:0032549//GO:0032559//GO:0016798//GO:0005515//GO:0016773//GO:0000166//GO:0001883//GO:0004672//GO:0001882//GO:0016772//GO:0043167//GO:0003674//GO:0036094//GO:0016301//GO:0004553//GO:0032553//GO:0005524//GO:0035639//GO:0032555//GO:0032550//GO:0016787//GO:0097159//GO:1901363//GO:0003824//GO:0030554//GO:0016740	carbohydrate derivative binding//nucleoside phosphate binding//purine nucleotide binding//anion binding//binding//ribonucleoside binding//adenyl ribonucleotide binding//hydrolase activity, acting on glycosyl bonds//protein binding//phosphotransferase activity, alcohol group as acceptor//nucleotide binding//purine nucleoside binding//protein kinase activity//nucleoside binding//transferase activit…	K13420 LRR receptor-like serine/threonine-protein kinase FLS2 [EC:2.7.11.1] | (RefSeq) probable LRR receptor-like serine/threonine-protein kinase At3g47570	http://www.genome.jp/dbget-bin/www_bget?sot:102586695	--	PREDICTED: LRR receptor-like serine/threonine-protein kinase EFR-like [Solanum tuberosum]
52	Novel02328	27.4992	2.57382	3.4174	0.0082598	0.049597	UP	--	--	--	--	--	--	--	--	--	--
53	Novel02379	1855.51	874.319	1.0856	2.6256e-05	0.00050507	UP	GO:0009259//GO:0034641//GO:0019693//GO:0009119//GO:1901135//GO:0006091//GO:0009116//GO:0072521//GO:0006807//GO:0009150//GO:0046483//GO:0044238//GO:0009205//GO:0042773//GO:0009167//GO:1901360//GO:0006139//GO:0042278//GO:0006753//GO:0006119//GO:0044237//GO:0009161//GO:0045333//GO:0016310//GO:0042775//GO:1901657//GO:0009199//GO:1901564//GO:0008150//GO:0046128//GO:0006163//GO:0009126//GO:0015980//GO:…	ribonucleotide metabolic process//cellular nitrogen compound metabolic process//ribose phosphate metabolic process//ribonucleoside metabolic process//carbohydrate derivative metabolic process//generation of precursor metabolites and energy//nucleoside metabolic process//purine-containing compound metabolic process//nitrogen compound metabolic process//purine ribonucleotide metabolic process//hete…	--	--	GO:0050136//GO:0016655//GO:0016491//GO:0016651//GO:0003824//GO:0008137//GO:0003954//GO:0003674	NADH dehydrogenase (quinone) activity//oxidoreductase activity, acting on NAD(P)H, quinone or similar compound as acceptor//oxidoreductase activity//oxidoreductase activity, acting on NAD(P)H//catalytic activity//NADH dehydrogenase (ubiquinone) activity//NADH dehydrogenase activity//molecular_function	K15378 solute carrier family 45, member 1/2/4 | (RefSeq) SUT4; sucrose transporter 4	http://www.genome.jp/dbget-bin/www_bget?sot:102577516	--	sucrose transporter 4 [Solanum tuberosum]>gi|160425326|gb|AAG25923.2| sucrose transporter 4 [Solanum tuberosum]
54	Novel02438	36.3168	3.13396	3.5346	0.0019045	0.016242	UP	--	--	--	--	--	--	K10730 ATP-dependent DNA helicase Q4 [EC:3.6.4.12] | (RefSeq) ATP-dependent DNA helicase Q-like 5	http://www.genome.jp/dbget-bin/www_bget?sot:102585773	--	PREDICTED: ATP-dependent DNA helicase Q-like 5-like [Solanum tuberosum]
55	Novel02477	118.439	35.8326	1.7248	0.0011797	0.011141	UP	--	--	--	--	GO:0097159//GO:0030554//GO:1901363//GO:0036094//GO:0003674//GO:0043167//GO:0032550//GO:0032555//GO:0043531//GO:0032553//GO:0005515//GO:0001882//GO:0001883//GO:0000166//GO:0017076//GO:1901265//GO:0097367//GO:0032559//GO:0032549//GO:0005488//GO:0043168	organic cyclic compound binding//adenyl nucleotide binding//heterocyclic compound binding//small molecule binding//molecular_function//ion binding//purine ribonucleoside binding//purine ribonucleotide binding//ADP binding//ribonucleotide binding//protein binding//nucleoside binding//purine nucleoside binding//nucleotide binding//purine nucleotide binding//nucleoside phosphate binding//carbohydrat…	no KO assigned | (RefSeq) putative late blight resistance protein homolog R1B-13	http://www.genome.jp/dbget-bin/www_bget?sot:102594054	--	PREDICTED: putative late blight resistance protein homolog R1A-3 [Solanum lycopersicum]
56	Novel02517	131.097	48.8551	1.4241	0.0046437	0.032277	UP	GO:0044237//GO:0043170//GO:0016310//GO:0006464//GO:0044267//GO:0036211//GO:0044238//GO:0006468//GO:0019538//GO:0008152//GO:0006793//GO:0071704//GO:0044260//GO:0043412//GO:0008150//GO:0009987//GO:0006796	cellular metabolic process//macromolecule metabolic process//phosphorylation//cellular protein modification process//cellular protein metabolic process//protein modification process//primary metabolic process//protein phosphorylation//protein metabolic process//metabolic process//phosphorus metabolic process//organic substance metabolic process//cellular macromolecule metabolic process//macromole…	--	--	GO:0043168//GO:0005488//GO:0032559//GO:0032549//GO:0097367//GO:1901265//GO:0017076//GO:0000166//GO:0001883//GO:0004672//GO:0016772//GO:0001882//GO:0016773//GO:0016301//GO:0005524//GO:0032553//GO:0032555//GO:0035639//GO:0032550//GO:0043167//GO:0036094//GO:0003674//GO:1901363//GO:0030554//GO:0003824//GO:0016740//GO:0097159	anion binding//binding//adenyl ribonucleotide binding//ribonucleoside binding//carbohydrate derivative binding//nucleoside phosphate binding//purine nucleotide binding//nucleotide binding//purine nucleoside binding//protein kinase activity//transferase activity, transferring phosphorus-containing groups//nucleoside binding//phosphotransferase activity, alcohol group as acceptor//kinase activity//…	no KO assigned | (RefSeq) receptor-like protein kinase HERK 1	http://www.genome.jp/dbget-bin/www_bget?sot:102606389	--	PREDICTED: receptor-like protein kinase HERK 1 [Nicotiana sylvestris]>gi|698423203|ref|XP_009781988.1| PREDICTED: receptor-like protein kinase HERK 1 [Nicotiana sylvestris]
57	Novel02582	400.122	73.1034	2.4524	2.206e-07	8.4807e-06	UP	--	--	--	--	--	--	--	--	--	--
58	Novel02860	210.315	69.2385	1.6029	0.00015868	0.0022312	UP	--	--	--	--	--	--	--	--	--	PREDICTED: uncharacterized protein LOC102581273 [Solanum tuberosum]
59	Novel03082	29.0782	1.59421	4.189	0.0018339	0.015784	UP	GO:0008150//GO:0008152//GO:0071704//GO:0005975//GO:0044238	biological_process//metabolic process//organic substance metabolic process//carbohydrate metabolic process//primary metabolic process	--	--	GO:0003824//GO:0004553//GO:0016787//GO:0003674//GO:0016798	catalytic activity//hydrolase activity, hydrolyzing O-glycosyl compounds//hydrolase activity//molecular_function//hydrolase activity, acting on glycosyl bonds	K05350 beta-glucosidase [EC:3.2.1.21] | (RefSeq) beta-glucosidase 18-like	http://www.genome.jp/dbget-bin/www_bget?sot:102582742	--	PREDICTED: beta-glucosidase 18-like [Solanum tuberosum]
60	Novel03084	66.9279	12.8113	2.3852	0.0018875	0.016134	UP	--	--	--	--	--	--	no KO assigned | (RefSeq) uncharacterized LOC102604717	http://www.genome.jp/dbget-bin/www_bget?sot:102604717	--	PREDICTED: uncharacterized protein LOC102604717 isoform X1 [Solanum tuberosum]
61	Novel03096	2618.88	1173.18	1.1585	6.812e-06	0.00016417	UP	GO:0006629//GO:1901135//GO:0046467//GO:0009058//GO:1903509//GO:0044238//GO:0044237//GO:0044255//GO:0006664//GO:0044249//GO:0008150//GO:0006643//GO:0008610//GO:0009987//GO:1901137//GO:0008152//GO:1901576//GO:0071704//GO:0009247	lipid metabolic process//carbohydrate derivative metabolic process//membrane lipid biosynthetic process//biosynthetic process//liposaccharide metabolic process//primary metabolic process//cellular metabolic process//cellular lipid metabolic process//glycolipid metabolic process//cellular biosynthetic process//biological_process//membrane lipid metabolic process//lipid biosynthetic process//cellul…	--	--	GO:0016758//GO:0016740//GO:0003824//GO:0016757//GO:0003674	transferase activity, transferring hexosyl groups//transferase activity//catalytic activity//transferase activity, transferring glycosyl groups//molecular_function	K03715 1,2-diacylglycerol 3-beta-galactosyltransferase [EC:2.4.1.46] | (RefSeq) probable monogalactosyldiacylglycerol synthase, chloroplastic	http://www.genome.jp/dbget-bin/www_bget?sot:102588275	--	PREDICTED: probable monogalactosyldiacylglycerol synthase, chloroplastic-like [Solanum tuberosum]
62	Novel03100	664.356	313.104	1.0853	0.00031276	0.0038496	UP	--	--	--	--	--	--	K02516 type II protein arginine methyltransferase [EC:2.1.1.320] | (RefSeq) protein arginine N-methyltransferase 1.5	http://www.genome.jp/dbget-bin/www_bget?sot:102597573	--	PREDICTED: protein arginine N-methyltransferase 1.5-like isoform X1 [Solanum tuberosum]
63	Novel03286	1299.94	593.399	1.1314	3.2871e-05	0.00060613	UP	--	--	--	--	--	--	K13606 chlorophyll(ide) b reductase [EC:1.1.1.294] | (RefSeq) chlorophyll(ide) b reductase NOL, chloroplastic	http://www.genome.jp/dbget-bin/www_bget?sot:102594861	--	PREDICTED: chlorophyll(ide) b reductase NOL, chloroplastic isoform X3 [Nicotiana sylvestris]
64	Novel03315	105.398	29.3809	1.8429	0.0016584	0.014571	UP	--	--	--	--	--	--	--	--	--	--
65	Novel03351	97.6873	31.6572	1.6256	0.0054358	0.036359	UP	GO:0009892//GO:0019222//GO:0065007//GO:0009058//GO:0008152//GO:0009889//GO:0050789//GO:0009890//GO:0008150//GO:0048519	negative regulation of metabolic process//regulation of metabolic process//biological regulation//biosynthetic process//metabolic process//regulation of biosynthetic process//regulation of biological process//negative regulation of biosynthetic process//biological_process//negative regulation of biological process	--	--	GO:0005488//GO:0005515//GO:0003674	binding//protein binding//molecular_function	no KO assigned | (RefSeq) putative disease resistance protein RGA1	http://www.genome.jp/dbget-bin/www_bget?sot:102579076	--	PREDICTED: putative disease resistance protein RGA1-like [Solanum tuberosum]
66	Novel03379	389.074	158.437	1.2961	0.00015225	0.0021632	UP	--	--	--	--	--	--	--	--	--	--
67	Novel03390	1713.62	276.293	2.6328	2.4728e-11	2.5157e-09	UP	--	--	--	--	--	--	--	--	--	--
68	Novel03418	131.893	31.4017	2.0705	0.00037361	0.0044536	UP	--	--	--	--	--	--	no KO assigned | (RefSeq) uncharacterized LOC102595796	http://www.genome.jp/dbget-bin/www_bget?sot:102595796	--	PREDICTED: stress response protein nst1-like isoform X1 [Solanum tuberosum]>gi|565382799|ref|XP_006357719.1| PREDICTED: stress response protein nst1-like isoform X2 [Solanum tuberosum]
69	Novel03500	122.973	37.1737	1.726	0.0010805	0.010398	UP	GO:0033554//GO:0009987//GO:0006281//GO:0008150//GO:0044260//GO:0006725//GO:0071704//GO:0008152//GO:0006807//GO:0006310//GO:0090304//GO:0044238//GO:0046483//GO:0006259//GO:0034641//GO:0050896//GO:0043170//GO:0006139//GO:1901360//GO:0006950//GO:0006974//GO:0051716//GO:0044237	cellular response to stress//cellular process//DNA repair//biological_process//cellular macromolecule metabolic process//cellular aromatic compound metabolic process//organic substance metabolic process//metabolic process//nitrogen compound metabolic process//DNA recombination//nucleic acid metabolic process//primary metabolic process//heterocycle metabolic process//DNA metabolic process//cellula…	--	--	GO:0098519//GO:0097159//GO:0016462//GO:0004386//GO:0009378//GO:0016788//GO:0019001//GO:0016740//GO:0003824//GO:0030554//GO:0003676//GO:1901363//GO:0003674//GO:0016818//GO:0036094//GO:0016791//GO:0043167//GO:0016787//GO:0032550//GO:0043531//GO:0035639//GO:0032555//GO:0032553//GO:0005524//GO:0016301//GO:0017111//GO:0003678//GO:0032561//GO:0001882//GO:0016772//GO:0005525//GO:0042578//GO:0001883//GO:…	nucleotide phosphatase activity, acting on free nucleotides//organic cyclic compound binding//pyrophosphatase activity//helicase activity//four-way junction helicase activity//hydrolase activity, acting on ester bonds//guanyl nucleotide binding//transferase activity//catalytic activity//adenyl nucleotide binding//nucleic acid binding//heterocyclic compound binding//molecular_function//hydrolase a…	K11269 chromosome transmission fidelity protein 18 | (RefSeq) chromosome transmission fidelity protein 18 homolog	http://www.genome.jp/dbget-bin/www_bget?sot:102583470	--	PREDICTED: chromosome transmission fidelity protein 18 homolog isoform X1 [Solanum tuberosum]
70	Novel03626	438.369	199.8	1.1336	0.0079384	0.048072	UP	GO:0008152//GO:0055114//GO:0008150	metabolic process//oxidation-reduction process//biological_process	--	--	GO:0003674//GO:0016491//GO:0003824	molecular_function//oxidoreductase activity//catalytic activity	--	--	--	PREDICTED: 1-aminocyclopropane-1-carboxylate oxidase homolog [Solanum tuberosum]
71	PGSC0003DMG400000028	333.478	86.7558	1.9426	1.4771e-05	0.00031748	UP	--	--	GO:0044425//GO:0016020//GO:0031224//GO:0005575//GO:0016021	membrane part//membrane//intrinsic component of membrane//cellular_component//integral component of membrane	--	--	no KO assigned | (RefSeq) O-glucosyltransferase rumi-like	http://www.genome.jp/dbget-bin/www_bget?sot:102580553	-	Lipopolysaccharide-modifying protein
72	PGSC0003DMG400000244	391.631	113.787	1.7832	4.4617e-05	0.00078267	UP	GO:0008150//GO:0055114//GO:0008152	biological_process//oxidation-reduction process//metabolic process	--	--	GO:0016705//GO:0016491//GO:0003824//GO:0020037//GO:1901363//GO:0046914//GO:0097159//GO:0043169//GO:0004497//GO:0005506//GO:0005488//GO:0046906//GO:0003674//GO:0043167//GO:0046872	oxidoreductase activity, acting on paired donors, with incorporation or reduction of molecular oxygen//oxidoreductase activity//catalytic activity//heme binding//heterocyclic compound binding//transition metal ion binding//organic cyclic compound binding//cation binding//monooxygenase activity//iron ion binding//binding//tetrapyrrole binding//molecular_function//ion binding//metal ion binding	no KO assigned | (RefSeq) cytochrome P450 78A3	http://www.genome.jp/dbget-bin/www_bget?sot:102595268	-	Cytochrome P450, E-class, group I||Cytochrome P450, conserved site||Cytochrome P450
73	PGSC0003DMG400000325	1074.09	454.024	1.2423	0.0041192	0.029559	UP	GO:0044237//GO:0008152//GO:0015979//GO:0008150//GO:0009987	cellular metabolic process//metabolic process//photosynthesis//biological_process//cellular process	GO:0044424//GO:0044425//GO:0032991//GO:0016020//GO:0016021//GO:0005575//GO:0009521//GO:0044436//GO:0005623//GO:0009523//GO:0098796//GO:0044464//GO:0031224//GO:0034357//GO:0009579//GO:0005622	intracellular part//membrane part//protein-containing complex//membrane//integral component of membrane//cellular_component//photosystem//thylakoid part//cell//photosystem II//membrane protein complex//cell part//intrinsic component of membrane//photosynthetic membrane//thylakoid//intracellular	--	--	no KO assigned | (RefSeq) uncharacterized LOC102596339	http://www.genome.jp/dbget-bin/www_bget?sot:102596339	-	Photosystem II PsbX
74	PGSC0003DMG400000327	883.952	275.845	1.6801	2.9985e-08	1.5175e-06	UP	GO:0015979//GO:0008152//GO:0044237//GO:0008150//GO:0009987	photosynthesis//metabolic process//cellular metabolic process//biological_process//cellular process	GO:0044425//GO:0044424//GO:0016020//GO:0032991//GO:0005575//GO:0016021//GO:0044436//GO:0005623//GO:0009521//GO:0009523//GO:0098796//GO:0031224//GO:0044464//GO:0034357//GO:0005622//GO:0009579	membrane part//intracellular part//membrane//protein-containing complex//cellular_component//integral component of membrane//thylakoid part//cell//photosystem//photosystem II//membrane protein complex//intrinsic component of membrane//cell part//photosynthetic membrane//intracellular//thylakoid	--	--	no KO assigned | (RefSeq) uncharacterized LOC102595674	http://www.genome.jp/dbget-bin/www_bget?sot:102595674	-	Photosystem II PsbX
75	PGSC0003DMG400000334	542.488	246.552	1.1377	0.0073686	0.045601	UP	--	--	--	--	--	--	no KO assigned | (RefSeq) IQ domain-containing protein IQM1	http://www.genome.jp/dbget-bin/www_bget?sot:102591923	--	--
76	PGSC0003DMG400000357	85.9877	17.78	2.2739	0.00063788	0.0068113	UP	--	--	--	--	--	--	no KO assigned | (RefSeq) protein IQ-DOMAIN 14-like	http://www.genome.jp/dbget-bin/www_bget?sot:102603748	-	IQ motif, EF-hand binding site||Domain of unknown function DUF4005
77	PGSC0003DMG400000383	7590.93	3286.15	1.2079	0.0043594	0.03078	UP	GO:0008152//GO:0031163//GO:0044085//GO:0008150//GO:0016043//GO:0009987//GO:0009058//GO:0016226//GO:0022607//GO:0071840	metabolic process//metallo-sulfur cluster assembly//cellular component biogenesis//biological_process//cellular component organization//cellular process//biosynthetic process//iron-sulfur cluster assembly//cellular component assembly//cellular component organization or biogenesis	GO:0005737//GO:0009507//GO:0044424//GO:0044435//GO:0043227//GO:0005575//GO:0043231//GO:0044422//GO:0043229//GO:0044446//GO:0005623//GO:0044444//GO:0009536//GO:0044434//GO:0009570//GO:0009532//GO:0044464//GO:0043226//GO:0005622	cytoplasm//chloroplast//intracellular part//plastid part//membrane-bounded organelle//cellular_component//intracellular membrane-bounded organelle//organelle part//intracellular organelle//intracellular organelle part//cell//cytoplasmic part//plastid//chloroplast part//chloroplast stroma//plastid stroma//cell part//organelle//intracellular	GO:0032553//GO:0005524//GO:0043168//GO:0032559//GO:0032549//GO:0032550//GO:0035639//GO:0032555//GO:0005488//GO:0043167//GO:1901265//GO:0051540//GO:0097367//GO:0003674//GO:0036094//GO:0017076//GO:0030554//GO:0001883//GO:0000166//GO:1901363//GO:0001882//GO:0097159//GO:0051536	ribonucleotide binding//ATP binding//anion binding//adenyl ribonucleotide binding//ribonucleoside binding//purine ribonucleoside binding//purine ribonucleoside triphosphate binding//purine ribonucleotide binding//binding//ion binding//nucleoside phosphate binding//metal cluster binding//carbohydrate derivative binding//molecular_function//small molecule binding//purine nucleotide binding//adenyl …	no KO assigned | (RefSeq) fe-S cluster assembly factor HCF101, chloroplastic	http://www.genome.jp/dbget-bin/www_bget?sot:102590013	HCF101	P-loop containing nucleoside triphosphate hydrolase||Fe-S cluster assembly domain||Mrp, conserved site||Domain of unknown function DUF971||Mrp/NBP35 ATP-binding protein||MIP18 family-like||Flagellum site-determining protein YlxH/ Fe-S cluster assembling factor NBP35
78	PGSC0003DMG400000441	1141.11	344.2	1.7291	6.6793e-08	3.0453e-06	UP	GO:0010556//GO:0060255//GO:0034654//GO:0019438//GO:0050794//GO:0018130//GO:0010468//GO:2000112//GO:0032774//GO:0065007//GO:0031326//GO:0008150//GO:0006355//GO:0050789//GO:0031323//GO:0044249//GO:0016070//GO:0009889//GO:0034641//GO:1901362//GO:0090304//GO:0080090//GO:0046483//GO:0044238//GO:0051171//GO:0009987//GO:0009058//GO:0006807//GO:0010467//GO:0008152//GO:0051252//GO:0044237//GO:0044271//GO:…	regulation of macromolecule biosynthetic process//regulation of macromolecule metabolic process//nucleobase-containing compound biosynthetic process//aromatic compound biosynthetic process//regulation of cellular process//heterocycle biosynthetic process//regulation of gene expression//regulation of cellular macromolecule biosynthetic process//RNA biosynthetic process//biological regulation//regu…	GO:0005623//GO:0043226//GO:0044464//GO:0005634//GO:0005622//GO:0044424//GO:0043227//GO:0043231//GO:0005575//GO:0043229	cell//organelle//cell part//nucleus//intracellular//intracellular part//membrane-bounded organelle//intracellular membrane-bounded organelle//cellular_component//intracellular organelle	GO:1901363//GO:0003677//GO:0003676//GO:0097159//GO:0005488//GO:0003674	heterocyclic compound binding//DNA binding//nucleic acid binding//organic cyclic compound binding//binding//molecular_function	no KO assigned | (RefSeq) dof zinc finger protein DOF5.1-like	http://www.genome.jp/dbget-bin/www_bget?sot:102592912	-	Zinc finger, Dof-type
79	PGSC0003DMG400000488	6022.77	2751.84	1.13	3.227e-05	0.00059748	UP	GO:0044271//GO:0043043//GO:0044237//GO:0008152//GO:1901576//GO:0044260//GO:0043604//GO:0009059//GO:0071704//GO:0006518//GO:0043170//GO:0034645//GO:0034641//GO:1901566//GO:0044249//GO:1901564//GO:0008150//GO:0044267//GO:0010467//GO:0043603//GO:0006807//GO:0009058//GO:0019538//GO:0044238//GO:0009987//GO:0006412	cellular nitrogen compound biosynthetic process//peptide biosynthetic process//cellular metabolic process//metabolic process//organic substance biosynthetic process//cellular macromolecule metabolic process//amide biosynthetic process//macromolecule biosynthetic process//organic substance metabolic process//peptide metabolic process//macromolecule metabolic process//cellular macromolecule biosynt…	GO:0043232//GO:0005840//GO:0044424//GO:0005737//GO:0043229//GO:0005575//GO:0032991//GO:0043228//GO:0005623//GO:0044444//GO:0005622//GO:0044464//GO:0043226	intracellular non-membrane-bounded organelle//ribosome//intracellular part//cytoplasm//intracellular organelle//cellular_component//protein-containing complex//non-membrane-bounded organelle//cell//cytoplasmic part//intracellular//cell part//organelle	GO:0003674//GO:0003735//GO:0005198	molecular_function//structural constituent of ribosome//structural molecule activity	K02935 large subunit ribosomal protein L7/L12 | (RefSeq) 50S ribosomal protein L12, chloroplastic-like	http://www.genome.jp/dbget-bin/www_bget?sot:102594809	-	Ribosomal protein L7/L12, C-terminal/adaptor protein ClpS-like||Ribosomal protein L7/L12, C-terminal||Ribosomal protein L7/L12, oligomerisation||Ribosomal protein L7/L12
80	PGSC0003DMG400000582	287.995	111.588	1.3679	0.006697	0.042419	UP	GO:0008152//GO:0055114//GO:0008150	metabolic process//oxidation-reduction process//biological_process	--	--	GO:0043167//GO:0046872//GO:0003674//GO:0005488//GO:0043169//GO:0003824//GO:0016491	ion binding//metal ion binding//molecular_function//binding//cation binding//catalytic activity//oxidoreductase activity	no KO assigned | (RefSeq) naringenin,2-oxoglutarate 3-dioxygenase-like	http://www.genome.jp/dbget-bin/www_bget?sot:102590513	-	Oxoglutarate/iron-dependent dioxygenase||Non-haem dioxygenase N-terminal domain||Isopenicillin N synthase-like
81	PGSC0003DMG400000621	3708.97	734.497	2.3362	0.00050595	0.0056591	UP	--	--	--	--	GO:0003674//GO:0009055	molecular_function//electron transfer activity	no KO assigned | (RefSeq) cucumber peeling cupredoxin-like	http://www.genome.jp/dbget-bin/www_bget?sot:102600778	-	Cupredoxin||Phytocyanin domain
82	PGSC0003DMG400000654	5041.26	2517.37	1.0019	0.00011046	0.0016667	UP	--	--	GO:0044464//GO:0043226//GO:0031974//GO:0005622//GO:0005634//GO:0005623//GO:0005730//GO:0043228//GO:0044428//GO:0043227//GO:0044422//GO:0070013//GO:0043229//GO:0044446//GO:0005575//GO:0043231//GO:0044424//GO:0031981//GO:0043233//GO:0043232	cell part//organelle//membrane-enclosed lumen//intracellular//nucleus//cell//nucleolus//non-membrane-bounded organelle//nuclear part//membrane-bounded organelle//organelle part//intracellular organelle lumen//intracellular organelle//intracellular organelle part//cellular_component//intracellular membrane-bounded organelle//intracellular part//nuclear lumen//organelle lumen//intracellular non-mem…	GO:0097159//GO:0003723//GO:0003676//GO:1901363//GO:0003674//GO:0005488	organic cyclic compound binding//RNA binding//nucleic acid binding//heterocyclic compound binding//molecular_function//binding	K11129 H/ACA ribonucleoprotein complex subunit 2 | (RefSeq) H/ACA ribonucleoprotein complex subunit 2-like protein	http://www.genome.jp/dbget-bin/www_bget?sot:102600899	-	Ribosomal protein L7Ae/L30e/S12e/Gadd45||Ribosomal protein L7Ae/L8/Nhp2 family||50S ribosomal protein L30e-like||H/ACA ribonucleoprotein complex, subunit Nhp2, eukaryote
83	PGSC0003DMG400000735	6205.4	955.661	2.699	0.00018992	0.0025761	UP	GO:0008150//GO:0016051//GO:0034637//GO:0044249//GO:0015980//GO:0000271//GO:0006091//GO:0055114//GO:0033692//GO:0009058//GO:0019252//GO:0005982//GO:0005976//GO:0005977//GO:0009987//GO:0006073//GO:0044238//GO:0009250//GO:0005978//GO:0008152//GO:0044264//GO:0044237//GO:0009059//GO:0044260//GO:1901576//GO:0005975//GO:0044262//GO:0044042//GO:0006112//GO:0034645//GO:0043170//GO:0071704	biological_process//carbohydrate biosynthetic process//cellular carbohydrate biosynthetic process//cellular biosynthetic process//energy derivation by oxidation of organic compounds//polysaccharide biosynthetic process//generation of precursor metabolites and energy//oxidation-reduction process//cellular polysaccharide biosynthetic process//biosynthetic process//starch biosynthetic process//starc…	GO:0009501//GO:0044444//GO:0005623//GO:0009536//GO:0005622//GO:0044464//GO:0043226//GO:0005737//GO:0009507//GO:0044424//GO:0005575//GO:0043231//GO:0043229//GO:0043227	amyloplast//cytoplasmic part//cell//plastid//intracellular//cell part//organelle//cytoplasm//chloroplast//intracellular part//cellular_component//intracellular membrane-bounded organelle//intracellular organelle//membrane-bounded organelle	GO:0001882//GO:0016772//GO:0016740//GO:0003824//GO:0030554//GO:0001883//GO:0000166//GO:1901363//GO:0097159//GO:0032549//GO:0032559//GO:0032550//GO:0008878//GO:0035639//GO:0032555//GO:0005488//GO:0032553//GO:0043168//GO:0005524//GO:0003674//GO:0016779//GO:0036094//GO:0017076//GO:0043167//GO:1901265//GO:0097367//GO:0070566	nucleoside binding//transferase activity, transferring phosphorus-containing groups//transferase activity//catalytic activity//adenyl nucleotide binding//purine nucleoside binding//nucleotide binding//heterocyclic compound binding//organic cyclic compound binding//ribonucleoside binding//adenyl ribonucleotide binding//purine ribonucleoside binding//glucose-1-phosphate adenylyltransferase activity…	K00975 glucose-1-phosphate adenylyltransferase [EC:2.7.7.27] | (RefSeq) AGPS1; glucose-1-phosphate adenylyltransferase large subunit 1-like	http://www.genome.jp/dbget-bin/www_bget?sot:102591766	-	Nucleotide-diphospho-sugar transferases||Nucleotidyl transferase domain||ADP-glucose pyrophosphorylase, conserved site||Trimeric LpxA-like
84	PGSC0003DMG400000779	31.9082	2.67629	3.5756	0.00282	0.02201	UP	GO:0071669//GO:0008150//GO:0071840//GO:0045229//GO:0071555//GO:0009664//GO:0009987//GO:0016043//GO:0071554	plant-type cell wall organization or biogenesis//biological_process//cellular component organization or biogenesis//external encapsulating structure organization//cell wall organization//plant-type cell wall organization//cellular process//cellular component organization//cell wall organization or biogenesis	--	--	GO:0005199//GO:0003674//GO:0005198	structural constituent of cell wall//molecular_function//structural molecule activity	no KO assigned | (RefSeq) extensin-3-like	http://www.genome.jp/dbget-bin/www_bget?sot:102583036	-	Extensin domain
85	PGSC0003DMG400000794	102.335	27.1985	1.9117	0.00097427	0.0096012	UP	--	--	--	--	--	--	no KO assigned | (RefSeq) extensin-1	http://www.genome.jp/dbget-bin/www_bget?sot:102583692	--	--
86	PGSC0003DMG400000984	34.3508	0.361769	6.5691	2.3764e-05	0.00046761	UP	GO:0006629//GO:0008150//GO:0055114//GO:0044238//GO:0008152//GO:0071704	lipid metabolic process//biological_process//oxidation-reduction process//primary metabolic process//metabolic process//organic substance metabolic process	GO:0005623//GO:0005622//GO:0044464//GO:0031224//GO:0044424//GO:0044425//GO:0005737//GO:0016021//GO:0005575//GO:0016020	cell//intracellular//cell part//intrinsic component of membrane//intracellular part//membrane part//cytoplasm//integral component of membrane//cellular_component//membrane	GO:0016491//GO:0003824//GO:0016627//GO:0003674	oxidoreductase activity//catalytic activity//oxidoreductase activity, acting on the CH-CH group of donors//molecular_function	K10258 very-long-chain enoyl-CoA reductase [EC:1.3.1.93] | (RefSeq) very-long-chain enoyl-CoA reductase-like	http://www.genome.jp/dbget-bin/www_bget?sot:102599277	-	3-oxo-5-alpha-steroid 4-dehydrogenase, C-terminal
87	PGSC0003DMG400000996	405.271	182.704	1.1494	0.0009079	0.0090424	UP	GO:0008150//GO:0043412//GO:0044267//GO:0019538//GO:0006796//GO:0006468//GO:0044238//GO:0009987//GO:0036211//GO:0006793//GO:0008152//GO:0044237//GO:0044260//GO:0006464//GO:0016310//GO:0071704//GO:0043170	biological_process//macromolecule modification//cellular protein metabolic process//protein metabolic process//phosphate-containing compound metabolic process//protein phosphorylation//primary metabolic process//cellular process//protein modification process//phosphorus metabolic process//metabolic process//cellular metabolic process//cellular macromolecule metabolic process//cellular protein mod…	GO:0031224//GO:0044425//GO:0005575//GO:0016021//GO:0016020	intrinsic component of membrane//membrane part//cellular_component//integral component of membrane//membrane	GO:0001882//GO:0016740//GO:0016772//GO:0004672//GO:0030554//GO:0003824//GO:0001883//GO:0000166//GO:1901363//GO:0016773//GO:0097159//GO:0004674//GO:0032559//GO:0032549//GO:0032550//GO:0035639//GO:0005488//GO:0032555//GO:0032553//GO:0005524//GO:0043168//GO:0016301//GO:0003674//GO:0036094//GO:0017076//GO:1901265//GO:0043167//GO:0097367	nucleoside binding//transferase activity//transferase activity, transferring phosphorus-containing groups//protein kinase activity//adenyl nucleotide binding//catalytic activity//purine nucleoside binding//nucleotide binding//heterocyclic compound binding//phosphotransferase activity, alcohol group as acceptor//organic cyclic compound binding//protein serine/threonine kinase activity//adenyl ribo…	no KO assigned | (RefSeq) probable LRR receptor-like serine/threonine-protein kinase At3g47570	http://www.genome.jp/dbget-bin/www_bget?sot:102600162	-	Leucine-rich repeat-containing N-terminal, plant-type||Protein kinase domain||Protein kinase, ATP binding site||Leucine-rich repeat||Serine/threonine-protein kinase, active site||Leucine-rich repeat domain, L domain-like||Leucine-rich repeat, typical subtype||Protein kinase-like domain
88	PGSC0003DMG400001001	240.436	66.7824	1.8481	9.2689e-06	0.0002144	UP	--	--	--	--	--	--	--	--	-	VQ
89	PGSC0003DMG400001204	2600.57	1284.07	1.0181	4.8587e-05	0.0008439	UP	GO:0006972//GO:0050896//GO:0009628//GO:0008150//GO:0006970//GO:0006950//GO:0009651//GO:0042538	hyperosmotic response//response to stimulus//response to abiotic stimulus//biological_process//response to osmotic stress//response to stress//response to salt stress//hyperosmotic salinity response	GO:0044464//GO:0005829//GO:0005622//GO:0005623//GO:0044444//GO:0005575//GO:0005737//GO:0044424	cell part//cytosol//intracellular//cell//cytoplasmic part//cellular_component//cytoplasm//intracellular part	GO:0043169//GO:0043167//GO:0046872//GO:0003674//GO:0005488//GO:0005509	cation binding//ion binding//metal ion binding//molecular_function//binding//calcium ion binding	K02183 calmodulin | (RefSeq) calmodulin	http://www.genome.jp/dbget-bin/www_bget?sot:102593468	ATCP1	EF-hand domain pair||EF-Hand 1, calcium-binding site||EF-hand domain
90	PGSC0003DMG400001333	1336.09	431.01	1.6322	2.1642e-09	1.4289e-07	UP	--	--	GO:0044425//GO:0016021//GO:0005575//GO:0016020//GO:0031224	membrane part//integral component of membrane//cellular_component//membrane//intrinsic component of membrane	GO:0005509//GO:0005488//GO:0003674//GO:0046872//GO:0043167//GO:0043169	calcium ion binding//binding//molecular_function//metal ion binding//ion binding//cation binding	K02183 calmodulin | (RefSeq) probable calcium-binding protein CML45	http://www.genome.jp/dbget-bin/www_bget?sot:102581338	-	EF-hand domain||EF-Hand 1, calcium-binding site||EF-hand domain pair
91	PGSC0003DMG400001366	4954.06	2119.5	1.2249	0.00081466	0.0083017	UP	--	--	--	--	--	--	no KO assigned | (RefSeq) uncharacterized LOC102606345	http://www.genome.jp/dbget-bin/www_bget?sot:102606345	--	--
92	PGSC0003DMG400001402	53.5426	6.02811	3.1509	0.00036431	0.004362	UP	--	--	--	--	--	--	no KO assigned | (RefSeq) uncharacterized LOC102600189	http://www.genome.jp/dbget-bin/www_bget?sot:102600189	--	--
93	PGSC0003DMG400001522	354.566	162.793	1.123	0.0012984	0.012027	UP	--	--	--	--	--	--	no KO assigned | (RefSeq) uncharacterized LOC102592062	http://www.genome.jp/dbget-bin/www_bget?sot:102592062	--	--
94	PGSC0003DMG400001688	4720.68	2172.32	1.1198	3.8567e-06	0.00010086	UP	--	--	--	--	--	--	no KO assigned | (RefSeq) uncharacterized LOC102588165	http://www.genome.jp/dbget-bin/www_bget?sot:102588165	-	Zf-FLZ domain
95	PGSC0003DMG400001718	4574.08	2128.63	1.1036	9.7891e-06	0.00022487	UP	GO:0044237//GO:0008152//GO:0071704//GO:0043170//GO:0044260//GO:0044267//GO:0008150//GO:0044238//GO:0009987//GO:0006457//GO:0019538	cellular metabolic process//metabolic process//organic substance metabolic process//macromolecule metabolic process//cellular macromolecule metabolic process//cellular protein metabolic process//biological_process//primary metabolic process//cellular process//protein folding//protein metabolic process	GO:0044424//GO:0005737//GO:0005575//GO:0005623//GO:0044464//GO:0005622	intracellular part//cytoplasm//cellular_component//cell//cell part//intracellular	--	--	K04078 chaperonin GroES | (RefSeq) 10 kDa chaperonin	http://www.genome.jp/dbget-bin/www_bget?sot:102586513	-	GroES-like||GroES chaperonin family
96	PGSC0003DMG400001739	480.812	81.9736	2.5522	0.0052306	0.035431	UP	--	--	--	--	--	--	no KO assigned | (RefSeq) uncharacterized LOC102584571	http://www.genome.jp/dbget-bin/www_bget?sot:102584571	-	Alpha/beta hydrolase fold-1||Alpha/Beta hydrolase fold
97	PGSC0003DMG400001760	161.957	0.617835	8.0342	0.0077462	0.047253	UP	--	--	--	--	--	--	no KO assigned | (RefSeq) interactor of constitutive active ROPs 2, chloroplastic	http://www.genome.jp/dbget-bin/www_bget?sot:102583027	-	Interactor of constitutive active ROPs
98	PGSC0003DMG400001923	2810.93	1381.78	1.0245	4.215e-05	0.00074419	UP	GO:0006508//GO:0008152//GO:0071704//GO:0043170//GO:0008150//GO:0019538//GO:0044238	proteolysis//metabolic process//organic substance metabolic process//macromolecule metabolic process//biological_process//protein metabolic process//primary metabolic process	GO:0044425//GO:0005575//GO:0016021//GO:0016020//GO:0031012//GO:0031224	membrane part//cellular_component//integral component of membrane//membrane//extracellular matrix//intrinsic component of membrane	GO:0008237//GO:0016787//GO:0004175//GO:0008270//GO:0005488//GO:0004222//GO:0003674//GO:0008233//GO:0043167//GO:0046872//GO:0003824//GO:0046914//GO:0070011//GO:0043169	metallopeptidase activity//hydrolase activity//endopeptidase activity//zinc ion binding//binding//metalloendopeptidase activity//molecular_function//peptidase activity//ion binding//metal ion binding//catalytic activity//transition metal ion binding//peptidase activity, acting on L-amino acid peptides//cation binding	no KO assigned | (RefSeq) metalloendoproteinase 3-MMP-like	http://www.genome.jp/dbget-bin/www_bget?sot:102592086	-	Peptidase M10A||Peptidase M10A, catalytic domain||Peptidase M10, metallopeptidase||Metallopeptidase, catalytic domain||Peptidoglycan binding-like||Peptidase, metallopeptidase
99	PGSC0003DMG400001948	3581.39	521.2	2.7806	6.1101e-27	7.3099e-24	UP	GO:0008152//GO:0008150	metabolic process//biological_process	--	--	GO:0000287//GO:0010333//GO:0016829//GO:0005488//GO:0016835//GO:0043167//GO:0016838//GO:0046872//GO:0003674//GO:0003824//GO:0043169	magnesium ion binding//terpene synthase activity//lyase activity//binding//carbon-oxygen lyase activity//ion binding//carbon-oxygen lyase activity, acting on phosphates//metal ion binding//molecular_function//catalytic activity//cation binding	K04120 ent-copalyl diphosphate synthase [EC:5.5.1.13] | (RefSeq) copal-8-ol diphosphate hydratase, chloroplastic-like	http://www.genome.jp/dbget-bin/www_bget?sot:102583793	-	Isoprenoid synthase domain||Terpene synthase, metal-binding domain||Terpenoid cyclases/protein prenyltransferase alpha-alpha toroid||Terpene synthase, N-terminal domain
100	PGSC0003DMG400001980	2078.17	991.626	1.0674	3.5632e-05	0.00064792	UP	--	--	GO:0005623//GO:0044464//GO:0071944//GO:0005575//GO:0016020//GO:0005886	cell//cell part//cell periphery//cellular_component//membrane//plasma membrane	--	--	no KO assigned | (RefSeq) uncharacterized LOC102579622	http://www.genome.jp/dbget-bin/www_bget?sot:102579622	-	NTF2-like domain
101	PGSC0003DMG400002019	65.5719	4.59072	3.8363	0.0031063	0.023665	UP	--	--	--	--	--	--	K01426 amidase [EC:3.5.1.4] | (RefSeq) putative amidase C869.01	http://www.genome.jp/dbget-bin/www_bget?sot:102592174	-	Amidase signature domain
102	PGSC0003DMG400002075	22.0722	0.921912	4.5815	0.0049691	0.034056	UP	GO:0030198//GO:0071554//GO:0016043//GO:0009987//GO:0009664//GO:0071555//GO:0040007//GO:0045229//GO:0071840//GO:0009832//GO:0022607//GO:0044085//GO:0070726//GO:0008150//GO:0010215//GO:0016049//GO:0071669//GO:0042546//GO:0043062//GO:0071668	extracellular matrix organization//cell wall organization or biogenesis//cellular component organization//cellular process//plant-type cell wall organization//cell wall organization//growth//external encapsulating structure organization//cellular component organization or biogenesis//plant-type cell wall biogenesis//cellular component assembly//cellular component biogenesis//cell wall assembly//b…	GO:0031224//GO:0016020//GO:0005575//GO:0044425//GO:0031225	intrinsic component of membrane//membrane//cellular_component//membrane part//anchored component of membrane	--	--	no KO assigned | (RefSeq) COBRA-like protein 10	http://www.genome.jp/dbget-bin/www_bget?sot:102598381	-	CRIB domain||COBRA, plant
103	PGSC0003DMG400002110	41.3922	0	Inf	0.00012212	0.0018019	UP	GO:0019538//GO:0045861//GO:0052547//GO:0048519//GO:0065009//GO:0080090//GO:0009987//GO:0031324//GO:0044238//GO:0048523//GO:0065007//GO:0051346//GO:0008150//GO:0031323//GO:0050789//GO:0043086//GO:0051248//GO:0051246//GO:0060255//GO:0052548//GO:0050794//GO:0032269//GO:0044267//GO:0044092//GO:0032268//GO:0044260//GO:0019222//GO:0010951//GO:0010605//GO:0030162//GO:0043170//GO:0071704//GO:0006508//GO:…	protein metabolic process//negative regulation of proteolysis//regulation of peptidase activity//negative regulation of biological process//regulation of molecular function//regulation of primary metabolic process//cellular process//negative regulation of cellular metabolic process//primary metabolic process//negative regulation of cellular process//biological regulation//negative regulation of h…	--	--	GO:0061135//GO:0004867//GO:0003674//GO:0004857//GO:0061134//GO:0030414//GO:0030234//GO:0098772//GO:0004866	endopeptidase regulator activity//serine-type endopeptidase inhibitor activity//molecular_function//enzyme inhibitor activity//peptidase regulator activity//peptidase inhibitor activity//enzyme regulator activity//molecular function regulator//endopeptidase inhibitor activity	no KO assigned | (RefSeq) proteinase inhibitor PSI-1.2-like	http://www.genome.jp/dbget-bin/www_bget?sot:102586215	-	Proteinase inhibitor I20
104	PGSC0003DMG400002146	7725.71	3609.07	1.098	0.0075125	0.046242	UP	GO:0048511//GO:0007623//GO:0008150	rhythmic process//circadian rhythm//biological_process	GO:0042644//GO:0044435//GO:0031984//GO:0016020//GO:0043227//GO:0009535//GO:0005694//GO:0005575//GO:0009526//GO:0043231//GO:0000229//GO:0044422//GO:0043229//GO:0044446//GO:0005737//GO:0009507//GO:0044425//GO:0055035//GO:0044424//GO:0042651//GO:0043232//GO:0009295//GO:0031975//GO:0009532//GO:0009941//GO:0044464//GO:0043226//GO:0005622//GO:0009579//GO:0042646//GO:0034357//GO:0098572//GO:0044444//GO:…	chloroplast nucleoid//plastid part//organelle subcompartment//membrane//membrane-bounded organelle//chloroplast thylakoid membrane//chromosome//cellular_component//plastid envelope//intracellular membrane-bounded organelle//cytoplasmic chromosome//organelle part//intracellular organelle//intracellular organelle part//cytoplasm//chloroplast//membrane part//plastid thylakoid membrane//intracellular…	--	--	no KO assigned | (RefSeq) protein plastid transcriptionally active 16, chloroplastic	http://www.genome.jp/dbget-bin/www_bget?sot:102588617	PTAC16	NAD(P)-binding domain
105	PGSC0003DMG400002170	98.5401	33.0066	1.578	0.0048278	0.03334	UP	--	--	--	--	--	--	K00799 glutathione S-transferase [EC:2.5.1.18] | (RefSeq) probable glutathione S-transferase	http://www.genome.jp/dbget-bin/www_bget?sot:102602051	-	Thioredoxin-like fold||Glutathione S-transferase, N-terminal||Glutathione S-transferase, C-terminal||Glutathione S-transferase, C-terminal-like
106	PGSC0003DMG400002171	72.8572	7.82703	3.2185	4.8319e-05	0.00084019	UP	--	--	--	--	--	--	K00799 glutathione S-transferase [EC:2.5.1.18] | (RefSeq) probable glutathione S-transferase	http://www.genome.jp/dbget-bin/www_bget?sot:102600687	-	Thioredoxin-like fold||Glutathione S-transferase, N-terminal||Glutathione S-transferase, C-terminal||Glutathione S-transferase, C-terminal-like
107	PGSC0003DMG400002174	1347.26	441.185	1.6106	3.1533e-09	2.0067e-07	UP	--	--	--	--	--	--	K00799 glutathione S-transferase [EC:2.5.1.18] | (RefSeq) probable glutathione S-transferase	http://www.genome.jp/dbget-bin/www_bget?sot:102597085	-	Glutathione S-transferase, C-terminal||Thioredoxin-like fold||Glutathione S-transferase, N-terminal||Glutathione S-transferase, C-terminal-like
108	PGSC0003DMG400002267	1053.23	347.686	1.599	2.2925e-05	0.00045497	UP	--	--	--	--	--	--	no KO assigned | (RefSeq) protein UPSTREAM OF FLC-like	http://www.genome.jp/dbget-bin/www_bget?sot:102591113	-	Upstream of FLC||Protein of unknown function DUF966
109	PGSC0003DMG400002456	47.9484	6.59458	2.8621	0.0018749	0.016059	UP	--	--	--	--	--	--	no KO assigned | (RefSeq) uncharacterized LOC102594119	http://www.genome.jp/dbget-bin/www_bget?sot:102594119	--	--
110	PGSC0003DMG400002561	336.452	149.418	1.171	0.0011308	0.010775	UP	--	--	--	--	--	--	no KO assigned | (RefSeq) F-box/kelch-repeat protein At1g80440-like	http://www.genome.jp/dbget-bin/www_bget?sot:102600650	-	Kelch repeat type 1||Kelch-type beta propeller||F-box domain
111	PGSC0003DMG400002566	1922.67	288.565	2.7361	0.00062158	0.0066753	UP	--	--	--	--	--	--	K17302 coatomer subunit beta' | (RefSeq) coatomer subunit beta'-1-like	http://www.genome.jp/dbget-bin/www_bget?sot:102604255	-	G-protein beta WD-40 repeat||WD40 repeat, conserved site||WD40-repeat-containing domain||WD40 repeat||Six-bladed beta-propeller, TolB-like
112	PGSC0003DMG400002626	8508.5	3734.09	1.1881	1.2996e-06	4.003e-05	UP	GO:0009987//GO:0008150//GO:0015979//GO:0008152//GO:0044237	cellular process//biological_process//photosynthesis//metabolic process//cellular metabolic process	GO:0044464//GO:0034357//GO:0005622//GO:0009579//GO:0044436//GO:0005623//GO:0009521//GO:0098796//GO:0009522//GO:0016020//GO:0032991//GO:0009538//GO:0005575//GO:0044425//GO:0044424	cell part//photosynthetic membrane//intracellular//thylakoid//thylakoid part//cell//photosystem//membrane protein complex//photosystem I//membrane//protein-containing complex//photosystem I reaction center//cellular_component//membrane part//intracellular part	--	--	K02695 photosystem I subunit VI | (RefSeq) photosystem I reaction center subunit VI, chloroplastic-like	http://www.genome.jp/dbget-bin/www_bget?sot:102590963	-	Signal peptide, camelysin||Photosystem I PsaH, reaction centre subunit VI
113	PGSC0003DMG400002883	265.622	37.4311	2.8271	0.0076647	0.046892	UP	GO:0007275//GO:0032502//GO:0008150//GO:0032501	multicellular organism development//developmental process//biological_process//multicellular organismal process	--	--	--	--	no KO assigned | (RefSeq) axial regulator YABBY 5-like	http://www.genome.jp/dbget-bin/www_bget?sot:102597616	-	YABBY protein||High mobility group box domain
114	PGSC0003DMG400002886	28.4614	2.62505	3.4386	0.0070865	0.044295	UP	--	--	--	--	--	--	no KO assigned | (RefSeq) receptor-like protein 12	http://www.genome.jp/dbget-bin/www_bget?sot:102587895	-	Leucine-rich repeat||Leucine-rich repeat domain, L domain-like||Leucine-rich repeat, typical subtype
115	PGSC0003DMG400002895	2237.91	293.296	2.9317	0.0053145	0.035768	UP	GO:0008150//GO:0009987//GO:0044238//GO:0005985//GO:0044237//GO:0009311//GO:0008152//GO:0071704//GO:0044262//GO:0005975//GO:0005984	biological_process//cellular process//primary metabolic process//sucrose metabolic process//cellular metabolic process//oligosaccharide metabolic process//metabolic process//organic substance metabolic process//cellular carbohydrate metabolic process//carbohydrate metabolic process//disaccharide metabolic process	--	--	GO:0016157//GO:0003824//GO:0008194//GO:0016740//GO:0046527//GO:0035251//GO:0016758//GO:0016757//GO:0003674	sucrose synthase activity//catalytic activity//UDP-glycosyltransferase activity//transferase activity//glucosyltransferase activity//UDP-glucosyltransferase activity//transferase activity, transferring hexosyl groups//transferase activity, transferring glycosyl groups//molecular_function	K00695 sucrose synthase [EC:2.4.1.13] | (RefSeq) SS16, sus4; Sucrose synthase	http://www.genome.jp/dbget-bin/www_bget?sot:102577594	-	Glycosyl transferase, family 1||Sucrose synthase, plant/cyanobacteria||Sucrose synthase
116	PGSC0003DMG400002906	100.198	15.1778	2.7228	1.7899e-05	0.00037202	UP	--	--	--	--	--	--	no KO assigned | (RefSeq) receptor-like protein 12	http://www.genome.jp/dbget-bin/www_bget?sot:102587895	-	Leucine-rich repeat||Leucine-rich repeat domain, L domain-like
117	PGSC0003DMG400002908	244.142	32.631	2.9034	2.181e-10	1.8427e-08	UP	--	--	GO:0005575//GO:0016021//GO:0016020//GO:0044425//GO:0031224	cellular_component//integral component of membrane//membrane//membrane part//intrinsic component of membrane	--	--	no KO assigned | (RefSeq) LRR receptor-like serine/threonine-protein kinase ERL1	http://www.genome.jp/dbget-bin/www_bget?sot:102589233	-	Leucine-rich repeat||Leucine-rich repeat domain, L domain-like
118	PGSC0003DMG400002910	237.954	42.1684	2.4964	2.1076e-08	1.1078e-06	UP	--	--	GO:0016020//GO:0016021//GO:0005575//GO:0044425//GO:0031224	membrane//integral component of membrane//cellular_component//membrane part//intrinsic component of membrane	--	--	no KO assigned | (RefSeq) receptor-like protein 12	http://www.genome.jp/dbget-bin/www_bget?sot:102587895	-	Leucine-rich repeat||Leucine-rich repeat domain, L domain-like||Leucine-rich repeat, typical subtype
119	PGSC0003DMG400003040	4490.76	344.937	3.7026	4.6043e-09	2.8047e-07	UP	--	--	--	--	--	--	no KO assigned | (RefSeq) osmotin-like protein OSML13	http://www.genome.jp/dbget-bin/www_bget?sot:102583784	-	Thaumatin, conserved site||Thaumatin
120	PGSC0003DMG400003047	253.956	72.2757	1.813	0.000976	0.0096087	UP	GO:0006807//GO:0010647//GO:0009058//GO:0023056//GO:1901700//GO:0010467//GO:1900457//GO:0048584//GO:0009967//GO:0070887//GO:0009742//GO:0080090//GO:0090304//GO:1901362//GO:0007165//GO:0051171//GO:0009987//GO:0046483//GO:0044238//GO:0071367//GO:0006355//GO:0071396//GO:0008150//GO:0031326//GO:0042221//GO:0065007//GO:2000112//GO:0032774//GO:0010468//GO:0009741//GO:0034641//GO:0009889//GO:0016070//GO:…	nitrogen compound metabolic process//positive regulation of cell communication//biosynthetic process//positive regulation of signaling//response to oxygen-containing compound//gene expression//regulation of brassinosteroid mediated signaling pathway//positive regulation of response to stimulus//positive regulation of signal transduction//cellular response to chemical stimulus//brassinosteroid med…	GO:0005622//GO:0005634//GO:0044464//GO:0043226//GO:0005623//GO:0005575//GO:0043231//GO:0043229//GO:0043227//GO:0044424	intracellular//nucleus//cell part//organelle//cell//cellular_component//intracellular membrane-bounded organelle//intracellular organelle//membrane-bounded organelle//intracellular part	--	--	no KO assigned | (RefSeq) scarecrow-like protein 28	http://www.genome.jp/dbget-bin/www_bget?sot:102579355	-	Transcription factor GRAS||SCL28-like
121	PGSC0003DMG400003052	35.4841	2.73398	3.6981	0.0011761	0.011114	UP	--	--	--	--	--	--	no KO assigned | (RefSeq) BON1-associated protein 2	http://www.genome.jp/dbget-bin/www_bget?sot:102586326	-	C2 domain
122	PGSC0003DMG400003189	1263.37	601.579	1.0705	0.00073168	0.0075959	UP	--	--	--	--	--	--	no KO assigned | (RefSeq) uncharacterized LOC102597502	http://www.genome.jp/dbget-bin/www_bget?sot:102597502	-	Protein of unknown function DUF1068
123	PGSC0003DMG400003220	19.7899	0.307304	6.009	0.0027195	0.021438	UP	GO:0019222//GO:0006725//GO:0006351//GO:0034645//GO:0043170//GO:0097659//GO:0071704//GO:0019219//GO:0009059//GO:2001141//GO:0044260//GO:1901576//GO:0051252//GO:0008152//GO:0044237//GO:1901360//GO:0006139//GO:1903506//GO:0044271//GO:0080090//GO:0090304//GO:1901362//GO:0051171//GO:0009987//GO:0046483//GO:0044238//GO:0006807//GO:0009058//GO:0010467//GO:0032502//GO:0019438//GO:0034654//GO:0060255//GO:…	regulation of metabolic process//cellular aromatic compound metabolic process//transcription, DNA-templated//cellular macromolecule biosynthetic process//macromolecule metabolic process//nucleic acid-templated transcription//organic substance metabolic process//regulation of nucleobase-containing compound metabolic process//macromolecule biosynthetic process//regulation of RNA biosynthetic proces…	GO:0043227//GO:0005575//GO:0043231//GO:0043229//GO:0044424//GO:0044464//GO:0043226//GO:0005622//GO:0005634//GO:0005623	membrane-bounded organelle//cellular_component//intracellular membrane-bounded organelle//intracellular organelle//intracellular part//cell part//organelle//intracellular//nucleus//cell	GO:0043167//GO:1901265//GO:0097367//GO:0003674//GO:0036094//GO:0017076//GO:0032553//GO:0043168//GO:0005524//GO:0032549//GO:0032559//GO:0032550//GO:0035639//GO:0032555//GO:0005488//GO:0097159//GO:0030554//GO:0001883//GO:0000166//GO:1901363//GO:0001882	ion binding//nucleoside phosphate binding//carbohydrate derivative binding//molecular_function//small molecule binding//purine nucleotide binding//ribonucleotide binding//anion binding//ATP binding//ribonucleoside binding//adenyl ribonucleotide binding//purine ribonucleoside binding//purine ribonucleoside triphosphate binding//purine ribonucleotide binding//binding//organic cyclic compound bindin…	no KO assigned | (RefSeq) growth-regulating factor 3	http://www.genome.jp/dbget-bin/www_bget?sot:102583957	AtGRF7	Glutamine-Leucine-Glutamine, QLQ||WRC domain||Growth-regulating factor
124	PGSC0003DMG400003250	193.819	74.345	1.3824	0.003539	0.0262	UP	--	--	--	--	--	--	no KO assigned | (RefSeq) uncharacterized LOC102587306	http://www.genome.jp/dbget-bin/www_bget?sot:102587306	-	Protein of unknown function DUF1645, plant
125	PGSC0003DMG400003288	3045.35	1249.24	1.2856	4.0537e-06	0.00010543	UP	GO:0009719//GO:0009725//GO:0010033//GO:0065008//GO:0050896//GO:0009735//GO:0008150//GO:0042221//GO:0065007//GO:0061635	response to endogenous stimulus//response to hormone//response to organic substance//regulation of biological quality//response to stimulus//response to cytokinin//biological_process//response to chemical//biological regulation//regulation of protein complex stability	GO:0005737//GO:0009507//GO:0044424//GO:0055035//GO:0042651//GO:0044435//GO:0031984//GO:0009535//GO:0043227//GO:0016020//GO:0005575//GO:0043231//GO:0044422//GO:0043229//GO:0044446//GO:0005623//GO:0044444//GO:0044436//GO:0009534//GO:0009536//GO:0044434//GO:0031976//GO:0044464//GO:0043226//GO:0009579//GO:0005622//GO:0034357	cytoplasm//chloroplast//intracellular part//plastid thylakoid membrane//thylakoid membrane//plastid part//organelle subcompartment//chloroplast thylakoid membrane//membrane-bounded organelle//membrane//cellular_component//intracellular membrane-bounded organelle//organelle part//intracellular organelle//intracellular organelle part//cell//cytoplasmic part//thylakoid part//chloroplast thylakoid//p…	--	--	no KO assigned | (RefSeq) uncharacterized LOC102590514	http://www.genome.jp/dbget-bin/www_bget?sot:102590514	--	--
126	PGSC0003DMG400003367	86.2997	6.23939	3.7899	3.6614e-06	9.6398e-05	UP	--	--	--	--	--	--	no KO assigned | (RefSeq) uncharacterized LOC102585280	http://www.genome.jp/dbget-bin/www_bget?sot:102585280	-	Protein of unknown function PDDEXK-like
127	PGSC0003DMG400003503	1491.16	718.528	1.0533	5.8067e-05	0.0009801	UP	--	--	--	--	GO:0016787//GO:0016817//GO:0047429//GO:0016818//GO:0003674//GO:0003824//GO:0016462	hydrolase activity//hydrolase activity, acting on acid anhydrides//nucleoside-triphosphate diphosphatase activity//hydrolase activity, acting on acid anhydrides, in phosphorus-containing anhydrides//molecular_function//catalytic activity//pyrophosphatase activity	K06287 septum formation protein | (RefSeq) maf-like protein DDB_G0281937	http://www.genome.jp/dbget-bin/www_bget?sot:102578264	-	Inosine triphosphate pyrophosphatase-like||Maf-like protein
128	PGSC0003DMG400003571	210.863	35.7738	2.5593	0.004787	0.033135	UP	--	--	--	--	--	--	no KO assigned | (RefSeq) pathogenesis-related protein 5-like	http://www.genome.jp/dbget-bin/www_bget?sot:102600305	-	Thaumatin, conserved site||Thaumatin
129	PGSC0003DMG400003609	43.2885	8.31721	2.3798	0.0080691	0.048706	UP	--	--	--	--	--	--	no KO assigned | (RefSeq) transcription factor bHLH113-like	http://www.genome.jp/dbget-bin/www_bget?sot:102592514	--	--
130	PGSC0003DMG400003615	5435.34	2668.7	1.0262	1.7294e-05	0.0003607	UP	GO:0050790//GO:0009893//GO:0008152//GO:0042592//GO:0019222//GO:0043085//GO:0006662//GO:0071704//GO:0048518//GO:0065008//GO:0018904//GO:0050794//GO:0008150//GO:0065007//GO:0050789//GO:0065009//GO:0044281//GO:0009987//GO:0045454//GO:0019725//GO:0055114//GO:0044093	regulation of catalytic activity//positive regulation of metabolic process//metabolic process//homeostatic process//regulation of metabolic process//positive regulation of catalytic activity//glycerol ether metabolic process//organic substance metabolic process//positive regulation of biological process//regulation of biological quality//ether metabolic process//regulation of cellular process//bi…	GO:0048046//GO:0005575//GO:0005623//GO:0005576	apoplast//cellular_component//cell//extracellular region	GO:0030234//GO:0098772//GO:0015035//GO:0015036//GO:0003674//GO:0016667//GO:0003824//GO:0016491//GO:0008047//GO:0016671	enzyme regulator activity//molecular function regulator//protein disulfide oxidoreductase activity//disulfide oxidoreductase activity//molecular_function//oxidoreductase activity, acting on a sulfur group of donors//catalytic activity//oxidoreductase activity//enzyme activator activity//oxidoreductase activity, acting on a sulfur group of donors, disulfide as acceptor	K03671 thioredoxin 1 | (RefSeq) thioredoxin H-type 2-like	http://www.genome.jp/dbget-bin/www_bget?sot:102599106	ATTRX1	Thioredoxin-like fold||Thioredoxin domain||Thioredoxin||Thioredoxin, conserved site
131	PGSC0003DMG400003621	113.37	40.5988	1.4815	0.0063047	0.040534	UP	--	--	GO:0044425//GO:0005575//GO:0016021//GO:0016020//GO:0031224	membrane part//cellular_component//integral component of membrane//membrane//intrinsic component of membrane	--	--	no KO assigned | (RefSeq) transmembrane and coiled-coil domain-containing protein 4-like	http://www.genome.jp/dbget-bin/www_bget?sot:102605011	-	Alpha/Beta hydrolase fold||Protein of unknown function DUF726
132	PGSC0003DMG400003625	125.066	17.3321	2.8512	1.1629e-06	3.6156e-05	UP	--	--	GO:0005575//GO:0044464//GO:0005622//GO:0005623	cellular_component//cell part//intracellular//cell	GO:0046872//GO:0043167//GO:0003674//GO:0005488//GO:0008270//GO:0043169//GO:0046914	metal ion binding//ion binding//molecular_function//binding//zinc ion binding//cation binding//transition metal ion binding	no KO assigned | (RefSeq) B-box zinc finger protein 19-like	http://www.genome.jp/dbget-bin/www_bget?sot:102606359	-	B-box-type zinc finger
133	PGSC0003DMG400003696	4281.2	1814.13	1.2387	7.6721e-07	2.5216e-05	UP	GO:0034641//GO:0044249//GO:1901566//GO:1901564//GO:0008150//GO:0044267//GO:0010467//GO:0043603//GO:0006807//GO:0019538//GO:0009058//GO:0009987//GO:0044238//GO:0006412//GO:0044271//GO:0043043//GO:0044237//GO:0008152//GO:0044260//GO:1901576//GO:0009059//GO:0043604//GO:0034645//GO:0043170//GO:0071704//GO:0006518	cellular nitrogen compound metabolic process//cellular biosynthetic process//organonitrogen compound biosynthetic process//organonitrogen compound metabolic process//biological_process//cellular protein metabolic process//gene expression//cellular amide metabolic process//nitrogen compound metabolic process//protein metabolic process//biosynthetic process//cellular process//primary metabolic proc…	GO:0043228//GO:0044444//GO:0005623//GO:0005622//GO:0044464//GO:0043226//GO:0043232//GO:0005840//GO:0044424//GO:0005737//GO:0043229//GO:0005575//GO:0032991	non-membrane-bounded organelle//cytoplasmic part//cell//intracellular//cell part//organelle//intracellular non-membrane-bounded organelle//ribosome//intracellular part//cytoplasm//intracellular organelle//cellular_component//protein-containing complex	GO:0003735//GO:0005198//GO:0003674	structural constituent of ribosome//structural molecule activity//molecular_function	K02909 large subunit ribosomal protein L31 | (RefSeq) 50S ribosomal protein L31, chloroplastic	http://www.genome.jp/dbget-bin/www_bget?sot:102598906	emb2184	L28p-like||Ribosomal protein L31
134	PGSC0003DMG400003759	658.961	63.5141	3.375	0.0040472	0.029126	UP	GO:0006810//GO:0006568//GO:0032989//GO:0051234//GO:0008150//GO:1901564//GO:0042221//GO:0065007//GO:0006521//GO:0090355//GO:0045764//GO:0034641//GO:0033240//GO:0031323//GO:0090357//GO:0009308//GO:0050789//GO:0032870//GO:0044085//GO:0032352//GO:0042430//GO:0023052//GO:0050896//GO:0009653//GO:0019752//GO:0050794//GO:0006807//GO:0040007//GO:0032502//GO:0051179//GO:0006576//GO:0071840//GO:0009914//GO:…	transport//tryptophan metabolic process//cellular component morphogenesis//establishment of localization//biological_process//organonitrogen compound metabolic process//response to chemical//biological regulation//regulation of cellular amino acid metabolic process//positive regulation of auxin metabolic process//positive regulation of cellular amino acid metabolic process//cellular nitrogen comp…	GO:0005773//GO:0044444//GO:0005623//GO:0005622//GO:0044437//GO:0031224//GO:0000325//GO:0044464//GO:0043226//GO:0009705//GO:0005737//GO:0044425//GO:0071944//GO:0044424//GO:0005575//GO:0043231//GO:0098805//GO:0016021//GO:0044422//GO:0044446//GO:0043229//GO:0005774//GO:0005886//GO:0016020//GO:0031090//GO:0043227//GO:0098588	vacuole//cytoplasmic part//cell//intracellular//vacuolar part//intrinsic component of membrane//plant-type vacuole//cell part//organelle//plant-type vacuole membrane//cytoplasm//membrane part//cell periphery//intracellular part//cellular_component//intracellular membrane-bounded organelle//whole membrane//integral component of membrane//organelle part//intracellular organelle part//intracellular …	GO:0022857//GO:0005215//GO:0003674	transmembrane transporter activity//transporter activity//molecular_function	no KO assigned | (RefSeq) protein WALLS ARE THIN 1	http://www.genome.jp/dbget-bin/www_bget?sot:102580573	WAT1	WAT1-related protein||EamA domain
135	PGSC0003DMG400003776	1568.87	712.563	1.1386	2.7411e-05	0.00052152	UP	--	--	GO:0031224//GO:0044425//GO:0005575//GO:0016021//GO:0016020	intrinsic component of membrane//membrane part//cellular_component//integral component of membrane//membrane	GO:0005515//GO:0005488//GO:0031072//GO:0051082//GO:0003674	protein binding//binding//heat shock protein binding//unfolded protein binding//molecular_function	no KO assigned | (RefSeq) protein SPA, chloroplastic	http://www.genome.jp/dbget-bin/www_bget?sot:102593418	-	Heat shock protein DnaJ, cysteine-rich domain
136	PGSC0003DMG400003806	265.037	66.0226	2.0052	1.8013e-06	5.2819e-05	UP	--	--	--	--	--	--	--	--	--	--
137	PGSC0003DMG400003990	401.416	162.15	1.3078	7.3773e-05	0.0011985	UP	--	--	--	--	--	--	no KO assigned | (RefSeq) fibrous sheath CABYR-binding protein-like	http://www.genome.jp/dbget-bin/www_bget?sot:102579224	--	--
138	PGSC0003DMG400003999	106.132	31.783	1.7395	0.0022276	0.018405	UP	GO:0036211//GO:0006468//GO:0044238//GO:0009987//GO:0019538//GO:0008037//GO:0006796//GO:0048544//GO:0009856//GO:0043412//GO:0044267//GO:0008150//GO:0016310//GO:0009875//GO:0032501//GO:0022414//GO:0044706//GO:0044703//GO:0071704//GO:0007154//GO:0043170//GO:0051704//GO:0044260//GO:0006464//GO:0008152//GO:0044237//GO:0006793	protein modification process//protein phosphorylation//primary metabolic process//cellular process//protein metabolic process//cell recognition//phosphate-containing compound metabolic process//recognition of pollen//pollination//macromolecule modification//cellular protein metabolic process//biological_process//phosphorylation//pollen-pistil interaction//multicellular organismal process//reprodu…	GO:0031224//GO:0016020//GO:0005575//GO:0016021//GO:0044425	intrinsic component of membrane//membrane//cellular_component//integral component of membrane//membrane part	GO:0097159//GO:0004674//GO:0016773//GO:0001883//GO:0030554//GO:0003824//GO:1901363//GO:0000166//GO:0016740//GO:0016772//GO:0001882//GO:0004672//GO:1901265//GO:0043167//GO:0097367//GO:0036094//GO:0003674//GO:0017076//GO:0005524//GO:0043168//GO:0032553//GO:0016301//GO:0032550//GO:0032559//GO:0032549//GO:0005488//GO:0032555//GO:0035639	organic cyclic compound binding//protein serine/threonine kinase activity//phosphotransferase activity, alcohol group as acceptor//purine nucleoside binding//adenyl nucleotide binding//catalytic activity//heterocyclic compound binding//nucleotide binding//transferase activity//transferase activity, transferring phosphorus-containing groups//nucleoside binding//protein kinase activity//nucleoside …	no KO assigned | (RefSeq) G-type lectin S-receptor-like serine/threonine-protein kinase RLK1	http://www.genome.jp/dbget-bin/www_bget?sot:102605532	-	EGF-like domain||Bulb-type lectin domain||Serine/threonine-protein kinase, active site||S-locus glycoprotein domain||Protein kinase, ATP binding site||Protein kinase-like domain||Protein kinase domain||S-receptor-like serine/threonine-protein kinase
139	PGSC0003DMG400004115	167.795	29.3522	2.5152	0.00012482	0.0018318	UP	--	--	GO:0031224//GO:0005575//GO:0016021//GO:0016020//GO:0044425	intrinsic component of membrane//cellular_component//integral component of membrane//membrane//membrane part	--	--	no KO assigned | (RefSeq) uncharacterized LOC102586185	http://www.genome.jp/dbget-bin/www_bget?sot:102586185	-	Six-bladed beta-propeller, TolB-like||NHL repeat
140	PGSC0003DMG400004150	7484.29	3025.38	1.3067	3.9512e-08	1.9342e-06	UP	GO:0042592//GO:0065008//GO:0008150//GO:0065007//GO:0050789//GO:0050794//GO:0009987//GO:0045454//GO:0019725	homeostatic process//regulation of biological quality//biological_process//biological regulation//regulation of biological process//regulation of cellular process//cellular process//cell redox homeostasis//cellular homeostasis	GO:0005737//GO:0044424//GO:0005575//GO:0043231//GO:0043229//GO:0043227//GO:0005783//GO:0044444//GO:0005623//GO:0005622//GO:0012505//GO:0044464//GO:0043226	cytoplasm//intracellular part//cellular_component//intracellular membrane-bounded organelle//intracellular organelle//membrane-bounded organelle//endoplasmic reticulum//cytoplasmic part//cell//intracellular//endomembrane system//cell part//organelle	GO:0016853//GO:0003674//GO:0003756//GO:0016864//GO:0003824//GO:0016860	isomerase activity//molecular_function//protein disulfide isomerase activity//intramolecular oxidoreductase activity, transposing S-S bonds//catalytic activity//intramolecular oxidoreductase activity	K09580 protein disulfide-isomerase A1 [EC:5.3.4.1] | (RefSeq) protein disulfide-isomerase-like	http://www.genome.jp/dbget-bin/www_bget?sot:102594080	-	Thioredoxin, conserved site||Protein disulphide isomerase||Disulphide isomerase||Thioredoxin domain||Thioredoxin-like fold
141	PGSC0003DMG400004153	1276.1	578.439	1.1415	3.4251e-05	0.00062887	UP	GO:0019752//GO:0018130//GO:0009309//GO:0042430//GO:1901607//GO:0044283//GO:0019438//GO:1901566//GO:0009308//GO:0044249//GO:0034641//GO:1901564//GO:0008150//GO:0006568//GO:0042401//GO:0043436//GO:0044238//GO:0046483//GO:0009987//GO:1901362//GO:0044281//GO:0006082//GO:0008652//GO:0042435//GO:0006576//GO:0046219//GO:0009058//GO:0006807//GO:0044237//GO:0016053//GO:0008152//GO:0044271//GO:1901360//GO:…	carboxylic acid metabolic process//heterocycle biosynthetic process//amine biosynthetic process//indole-containing compound metabolic process//alpha-amino acid biosynthetic process//small molecule biosynthetic process//aromatic compound biosynthetic process//organonitrogen compound biosynthetic process//amine metabolic process//cellular biosynthetic process//cellular nitrogen compound metabolic p…	GO:0009536//GO:0005623//GO:0044444//GO:0043226//GO:0044464//GO:0005622//GO:0044424//GO:0009507//GO:0005737//GO:0043227//GO:0043229//GO:0043231//GO:0005575	plastid//cell//cytoplasmic part//organelle//cell part//intracellular//intracellular part//chloroplast//cytoplasm//membrane-bounded organelle//intracellular organelle//intracellular membrane-bounded organelle//cellular_component	GO:0004049//GO:0003824//GO:0016830//GO:0016829//GO:0016833//GO:0003674	anthranilate synthase activity//catalytic activity//carbon-carbon lyase activity//lyase activity//oxo-acid-lyase activity//molecular_function	K01657 anthranilate synthase component I [EC:4.1.3.27] | (RefSeq) anthranilate synthase alpha subunit 2, chloroplastic-like	http://www.genome.jp/dbget-bin/www_bget?sot:102595737	ASA2	Anthranilate synthase component I, N-terminal||Chorismate-utilising enzyme, C-terminal||Anthranilate synthase component I, PabB-like||Anthranilate synthase component I-like||ADC synthase
142	PGSC0003DMG400004298	27.7163	0	Inf	0.00085233	0.0086006	UP	--	--	--	--	--	--	no KO assigned | (RefSeq) fasciclin-like arabinogalactan protein 2	http://www.genome.jp/dbget-bin/www_bget?sot:102578658	-	FAS1 domain||Fasciclin-like arabinogalactan protein
143	PGSC0003DMG400004319	1740.65	581.091	1.5828	0.0010381	0.01009	UP	--	--	GO:0016021//GO:0005575//GO:0016020//GO:0044425//GO:0031224	integral component of membrane//cellular_component//membrane//membrane part//intrinsic component of membrane	--	--	no KO assigned | (RefSeq) ankyrin repeat-containing protein At3g12360-like	http://www.genome.jp/dbget-bin/www_bget?sot:102598560	-	Ankyrin repeat-containing domain||Ankyrin repeat||PGG domain
144	PGSC0003DMG400004354	183.127	34.0901	2.4254	0.0031188	0.023741	UP	--	--	GO:0031224//GO:0005575//GO:0016021//GO:0016020//GO:0044425	intrinsic component of membrane//cellular_component//integral component of membrane//membrane//membrane part	--	--	no KO assigned | (RefSeq) uncharacterized LOC102603997	http://www.genome.jp/dbget-bin/www_bget?sot:102603997	-	AWPM-19-like
145	PGSC0003DMG400004398	246.011	60.6793	2.0194	0.0080824	0.048767	UP	--	--	GO:0016020//GO:0005575	membrane//cellular_component	GO:0005488//GO:0003674//GO:1901363//GO:0003676//GO:0097159	binding//molecular_function//heterocyclic compound binding//nucleic acid binding//organic cyclic compound binding	no KO assigned | (RefSeq) uncharacterized LOC102587887	http://www.genome.jp/dbget-bin/www_bget?sot:102587887	-	Zinc finger C2H2-type||TB2/DP1/HVA22-related protein
146	PGSC0003DMG400004518	187.921	77.4228	1.2793	0.0040201	0.028966	UP	--	--	GO:0031224//GO:0016020//GO:0005575//GO:0016021//GO:0044425	intrinsic component of membrane//membrane//cellular_component//integral component of membrane//membrane part	--	--	--	--	--	--
147	PGSC0003DMG400004665	75.7975	3.43804	4.4625	2.412e-07	9.0973e-06	UP	--	--	--	--	--	--	--	--	--	--
148	PGSC0003DMG400004703	1053.59	364.847	1.5299	0.0012844	0.011915	UP	GO:0008150//GO:0050896//GO:0006950	biological_process//response to stimulus//response to stress	--	--	--	--	no KO assigned | (RefSeq) late embryogenesis abundant protein Lea5	http://www.genome.jp/dbget-bin/www_bget?sot:102578780	-	Late embryogenesis abundant protein, LEA5-type
149	PGSC0003DMG400004734	7896.61	3170.14	1.3167	6.7471e-06	0.000163	UP	--	--	--	--	--	--	no KO assigned | (RefSeq) uncharacterized LOC102585177	http://www.genome.jp/dbget-bin/www_bget?sot:102585177	--	--
150	PGSC0003DMG400004737	37.6866	1.23244	4.9345	0.00012043	0.00178	UP	--	--	--	--	--	--	no KO assigned | (RefSeq) 14 kDa proline-rich protein DC2.15-like	http://www.genome.jp/dbget-bin/www_bget?sot:102584535	-	Bifunctional inhibitor/plant lipid transfer protein/seed storage helical domain||Hydrophobic seed protein
151	PGSC0003DMG400004822	3918.22	1792.96	1.1279	1.5388e-05	0.0003278	UP	GO:0008152//GO:0008150//GO:0055114	metabolic process//biological_process//oxidation-reduction process	--	--	GO:0003674//GO:0003824//GO:0016491	molecular_function//catalytic activity//oxidoreductase activity	no KO assigned | (RefSeq) inositol 2-dehydrogenase/D-chiro-inositol 3-dehydrogenase	http://www.genome.jp/dbget-bin/www_bget?sot:102589144	-	Oxidoreductase, C-terminal||Oxidoreductase, N-terminal||NAD(P)-binding domain
152	PGSC0003DMG400004936	2533.81	1210.68	1.0655	3.1107e-05	0.00058222	UP	GO:0044267//GO:0044249//GO:1901566//GO:0034641//GO:1901564//GO:0008150//GO:0009987//GO:0044238//GO:0006412//GO:0043603//GO:0010467//GO:0019538//GO:0009058//GO:0006807//GO:0044237//GO:0008152//GO:0044271//GO:0043043//GO:0043170//GO:0034645//GO:0006518//GO:0071704//GO:1901576//GO:0044260//GO:0009059//GO:0043604	cellular protein metabolic process//cellular biosynthetic process//organonitrogen compound biosynthetic process//cellular nitrogen compound metabolic process//organonitrogen compound metabolic process//biological_process//cellular process//primary metabolic process//translation//cellular amide metabolic process//gene expression//protein metabolic process//biosynthetic process//nitrogen compound m…	GO:0009536//GO:0044444//GO:0005623//GO:0043228//GO:0043226//GO:0044464//GO:0005622//GO:0044424//GO:0009507//GO:0005737//GO:0043232//GO:0005840//GO:0032991//GO:0043227//GO:0043229//GO:0043231//GO:0005575	plastid//cytoplasmic part//cell//non-membrane-bounded organelle//organelle//cell part//intracellular//intracellular part//chloroplast//cytoplasm//intracellular non-membrane-bounded organelle//ribosome//protein-containing complex//membrane-bounded organelle//intracellular organelle//intracellular membrane-bounded organelle//cellular_component	GO:1901363//GO:0003676//GO:0097159//GO:0005198//GO:0003723//GO:0003735//GO:0019843//GO:0005488//GO:0003674	heterocyclic compound binding//nucleic acid binding//organic cyclic compound binding//structural molecule activity//RNA binding//structural constituent of ribosome//rRNA binding//binding//molecular_function	K19035 50S ribosomal protein 6 | (RefSeq) 50S ribosomal protein 6, chloroplastic	http://www.genome.jp/dbget-bin/www_bget?sot:102599194	PSRP6	Ribosomal protein L6, chloroplast
153	PGSC0003DMG400005094	203.27	90.2757	1.171	0.0056062	0.037204	UP	--	--	--	--	--	--	--	--	--	--
154	PGSC0003DMG400005232	7992.03	3817.15	1.0661	1.2983e-05	0.00028594	UP	GO:0009987//GO:0044238//GO:0036211//GO:0016043//GO:0006457//GO:0071840//GO:0022607//GO:0019538//GO:0043933//GO:0043412//GO:0044267//GO:0044085//GO:0000413//GO:0010275//GO:0008150//GO:0065003//GO:0043170//GO:0071704//GO:0070271//GO:0034622//GO:0006464//GO:0044260//GO:0044237//GO:0018208//GO:0018193//GO:0008152	cellular process//primary metabolic process//protein modification process//cellular component organization//protein folding//cellular component organization or biogenesis//cellular component assembly//protein metabolic process//protein-containing complex subunit organization//macromolecule modification//cellular protein metabolic process//cellular component biogenesis//protein peptidyl-prolyl iso…	GO:0009533//GO:0044464//GO:0043226//GO:0009532//GO:0005622//GO:0009579//GO:0034357//GO:0009536//GO:0044444//GO:0005623//GO:0009534//GO:0044436//GO:0031976//GO:0009570//GO:0044434//GO:0031984//GO:0044435//GO:0016020//GO:0043227//GO:0009535//GO:0044422//GO:0044446//GO:0043229//GO:0005575//GO:0043231//GO:0031977//GO:0055035//GO:0044424//GO:0005737//GO:0009507//GO:0042651	chloroplast stromal thylakoid//cell part//organelle//plastid stroma//intracellular//thylakoid//photosynthetic membrane//plastid//cytoplasmic part//cell//chloroplast thylakoid//thylakoid part//plastid thylakoid//chloroplast stroma//chloroplast part//organelle subcompartment//plastid part//membrane//membrane-bounded organelle//chloroplast thylakoid membrane//organelle part//intracellular organelle …	GO:0005515//GO:0003824//GO:0016859//GO:0019901//GO:0043424//GO:0003674//GO:0019899//GO:0019900//GO:0003755//GO:0005488//GO:0016853	protein binding//catalytic activity//cis-trans isomerase activity//protein kinase binding//protein histidine kinase binding//molecular_function//enzyme binding//kinase binding//peptidyl-prolyl cis-trans isomerase activity//binding//isomerase activity	K03768 peptidyl-prolyl cis-trans isomerase B (cyclophilin B) [EC:5.2.1.8] | (RefSeq) photosynthetic NDH subunit of lumenal location 5, chloroplastic	http://www.genome.jp/dbget-bin/www_bget?sot:102602349	ATCYP20-2	Cyclophilin-type peptidyl-prolyl cis-trans isomerase||Cyclophilin-like domain||Cyclophilin-type peptidyl-prolyl cis-trans isomerase domain||Cyclophilin-type peptidyl-prolyl cis-trans isomerase, conserved site
155	PGSC0003DMG400005269	1395.86	11.6661	6.9027	0.00022978	0.0030076	UP	GO:0051179//GO:0008150//GO:0051234//GO:0006810	localization//biological_process//establishment of localization//transport	GO:0016020//GO:0005575//GO:0016021//GO:0044425//GO:0031224	membrane//cellular_component//integral component of membrane//membrane part//intrinsic component of membrane	GO:0003674//GO:0005215	molecular_function//transporter activity	K15283 solute carrier family 35, member E1 | (RefSeq) GPT; glucose-6-phosphate/phosphate translocator 2, chloroplastic	http://www.genome.jp/dbget-bin/www_bget?sot:102577730	-	Sugar phosphate transporter domain||Triose phosphate/phosphoenolpyruvate translocator
156	PGSC0003DMG400005276	1254.65	623.601	1.0086	0.00024946	0.0032105	UP	GO:0031163//GO:0008152//GO:0008150//GO:0044085//GO:0071840//GO:0022607//GO:0016226//GO:0009058//GO:0009987//GO:0016043	metallo-sulfur cluster assembly//metabolic process//biological_process//cellular component biogenesis//cellular component organization or biogenesis//cellular component assembly//iron-sulfur cluster assembly//biosynthetic process//cellular process//cellular component organization	--	--	GO:0005506//GO:0005488//GO:0003674//GO:0046872//GO:0051540//GO:0043167//GO:0046914//GO:0051536//GO:0043169	iron ion binding//binding//molecular_function//metal ion binding//metal cluster binding//ion binding//transition metal ion binding//iron-sulfur cluster binding//cation binding	no KO assigned | (RefSeq) nifU-like protein 3, chloroplastic	http://www.genome.jp/dbget-bin/www_bget?sot:102586740	NFU3	NIF system FeS cluster assembly, NifU, C-terminal||Fe-S cluster assembly domain
157	PGSC0003DMG400005390	1004.75	228.628	2.1358	1.3747e-08	7.6423e-07	UP	GO:0006950//GO:0008150//GO:0050896	response to stress//biological_process//response to stimulus	--	--	GO:0003674//GO:0005516//GO:0005488//GO:0005515	molecular_function//calmodulin binding//binding//protein binding	no KO assigned | (RefSeq) protein SAR DEFICIENT 1-like	http://www.genome.jp/dbget-bin/www_bget?sot:102604313	-	CALMODULIN-BINDING PROTEIN60
158	PGSC0003DMG400005415	1778.49	507.895	1.8081	0.0077571	0.047285	UP	--	--	--	--	--	--	no KO assigned | (RefSeq) auxin-induced in root cultures protein 12	http://www.genome.jp/dbget-bin/www_bget?sot:102581154	-	Cytochrome b561 and DOMON domain-containing protein||DOMON domain
159	PGSC0003DMG400005442	1984.28	792.339	1.3244	0.0011906	0.011229	UP	--	--	GO:0016021//GO:0005575//GO:0005886//GO:0016020//GO:0031225//GO:0031226//GO:0071944//GO:0044425//GO:0044459//GO:0046658//GO:0044464//GO:0031224//GO:0005623	integral component of membrane//cellular_component//plasma membrane//membrane//anchored component of membrane//intrinsic component of plasma membrane//cell periphery//membrane part//plasma membrane part//anchored component of plasma membrane//cell part//intrinsic component of membrane//cell	--	--	no KO assigned | (RefSeq) uncharacterized GPI-anchored protein At4g28100	http://www.genome.jp/dbget-bin/www_bget?sot:102586269	--	--
160	PGSC0003DMG400005515	611.17	208.682	1.5503	0.0025995	0.020694	UP	GO:0008152//GO:0008150//GO:0055114	metabolic process//biological_process//oxidation-reduction process	GO:0044425//GO:0016021//GO:0005575//GO:0016020//GO:0005576//GO:0031224	membrane part//integral component of membrane//cellular_component//membrane//extracellular region//intrinsic component of membrane	GO:0005488//GO:0005507//GO:0003674//GO:0046872//GO:0043167//GO:0016491//GO:0003824//GO:0046914//GO:0043169	binding//copper ion binding//molecular_function//metal ion binding//ion binding//oxidoreductase activity//catalytic activity//transition metal ion binding//cation binding	no KO assigned | (RefSeq) L-ascorbate oxidase-like	http://www.genome.jp/dbget-bin/www_bget?sot:102582168	-	L-ascorbate oxidase, plants||Multicopper oxidase, type 1||Multicopper oxidase, type 3||Multicopper oxidase, copper-binding site||Multicopper oxidase, type 2||Ascorbate oxidase, third cupredoxin domain||Multicopper oxidases, conserved site||Cupredoxin
161	PGSC0003DMG400005633	2231.61	806.965	1.4675	9.2025e-05	0.0014448	UP	--	--	GO:0044464//GO:0043226//GO:0005622//GO:0005634//GO:0005623//GO:0043227//GO:0005575//GO:0043231//GO:0043229//GO:0044424	cell part//organelle//intracellular//nucleus//cell//membrane-bounded organelle//cellular_component//intracellular membrane-bounded organelle//intracellular organelle//intracellular part	GO:0043169//GO:0046914//GO:0043167//GO:0046872//GO:0003674//GO:0008270//GO:0005488	cation binding//transition metal ion binding//ion binding//metal ion binding//molecular_function//zinc ion binding//binding	no KO assigned | (RefSeq) zinc finger protein CONSTANS-LIKE 16-like	http://www.genome.jp/dbget-bin/www_bget?sot:102595945	-	CCT domain||B-box-type zinc finger
162	PGSC0003DMG400005670	45.1063	6.78663	2.7326	0.0033984	0.025417	UP	--	--	GO:0005623//GO:0043226//GO:0044464//GO:0005634//GO:0005622//GO:0044424//GO:0043227//GO:0043229//GO:0043231//GO:0005575	cell//organelle//cell part//nucleus//intracellular//intracellular part//membrane-bounded organelle//intracellular organelle//intracellular membrane-bounded organelle//cellular_component	GO:1901363//GO:0003677//GO:0003676//GO:0097159//GO:0005488//GO:0003674	heterocyclic compound binding//DNA binding//nucleic acid binding//organic cyclic compound binding//binding//molecular_function	no KO assigned | (RefSeq) WUSCHEL-related homeobox 1	http://www.genome.jp/dbget-bin/www_bget?sot:102598012	WOX1	Homeobox domain||Homeobox domain-like
163	PGSC0003DMG400005698	55.118	0.307304	7.4867	0.00089911	0.0089758	UP	GO:0055114//GO:0008150//GO:0008152	oxidation-reduction process//biological_process//metabolic process	--	--	GO:0043169//GO:0016491//GO:0003824//GO:0003674//GO:0046872//GO:0043167//GO:0005488	cation binding//oxidoreductase activity//catalytic activity//molecular_function//metal ion binding//ion binding//binding	K04124 gibberellin 3-beta-dioxygenase [EC:1.14.11.15] | (RefSeq) GA3ox2; gibberellin 3-beta-dioxygenase 1-like	http://www.genome.jp/dbget-bin/www_bget?sot:102582924	-	Isopenicillin N synthase-like||Non-haem dioxygenase N-terminal domain||Oxoglutarate/iron-dependent dioxygenase
164	PGSC0003DMG400005719	887.329	395.851	1.1645	0.00033175	0.0040367	UP	--	--	--	--	--	--	no KO assigned | (RefSeq) LOB domain-containing protein 41-like	http://www.genome.jp/dbget-bin/www_bget?sot:102595607	-	Lateral organ boundaries, LOB
165	PGSC0003DMG400005805	12606	4884.73	1.3678	0.00019012	0.0025776	UP	GO:0009987//GO:0008150//GO:0044237//GO:0008152//GO:0015979	cellular process//biological_process//cellular metabolic process//metabolic process//photosynthesis	GO:0034357//GO:0009579//GO:0005622//GO:0043226//GO:0044464//GO:0031976//GO:0009522//GO:0098796//GO:0044434//GO:0009536//GO:0009521//GO:0044436//GO:0009534//GO:0005623//GO:0044444//GO:0044446//GO:0043229//GO:0044422//GO:0043231//GO:0005575//GO:0032991//GO:0009535//GO:0043227//GO:0016020//GO:0031984//GO:0044435//GO:0042651//GO:0044424//GO:0055035//GO:0044425//GO:0009507//GO:0005737	photosynthetic membrane//thylakoid//intracellular//organelle//cell part//plastid thylakoid//photosystem I//membrane protein complex//chloroplast part//plastid//photosystem//thylakoid part//chloroplast thylakoid//cell//cytoplasmic part//intracellular organelle part//intracellular organelle//organelle part//intracellular membrane-bounded organelle//cellular_component//protein-containing complex//ch…	--	--	K02701 photosystem I subunit PsaN | (RefSeq) photosystem I reaction center subunit N, chloroplastic	http://www.genome.jp/dbget-bin/www_bget?sot:102603293	PSAN	Photosystem I reaction centre subunit N, chloroplastic
166	PGSC0003DMG400005810	3531.59	1130.54	1.6433	0.0068331	0.043071	UP	GO:0008152//GO:0008150	metabolic process//biological_process	--	--	GO:0003674//GO:0016787//GO:0003824	molecular_function//hydrolase activity//catalytic activity	no KO assigned | (RefSeq) haloacid dehalogenase-like hydrolase domain-containing protein Sgpp	http://www.genome.jp/dbget-bin/www_bget?sot:102599074	-	Phosphoglycolate phosphatase, domain 2||HAD hydrolase, subfamily IA||HAD-like domain
167	PGSC0003DMG400005844	4241.33	1929.94	1.136	2.779e-06	7.5976e-05	UP	--	--	--	--	--	--	no KO assigned | (RefSeq) B2 protein-like	http://www.genome.jp/dbget-bin/www_bget?sot:102582648	-	Development/cell death domain
168	PGSC0003DMG400005894	1208.26	588.356	1.0382	0.00013673	0.0019718	UP	GO:0018130//GO:0050794//GO:0019438//GO:0034654//GO:0060255//GO:0010556//GO:0034641//GO:0048731//GO:0009889//GO:0016070//GO:0031323//GO:0044249//GO:0050789//GO:0006355//GO:0008150//GO:0031326//GO:0065007//GO:2000112//GO:0032774//GO:0010468//GO:0051171//GO:0009987//GO:0048513//GO:0046483//GO:0044238//GO:0007275//GO:0080090//GO:0090304//GO:1901362//GO:0010467//GO:0032502//GO:0006807//GO:0009058//GO:…	heterocycle biosynthetic process//regulation of cellular process//aromatic compound biosynthetic process//nucleobase-containing compound biosynthetic process//regulation of macromolecule metabolic process//regulation of macromolecule biosynthetic process//cellular nitrogen compound metabolic process//system development//regulation of biosynthetic process//RNA metabolic process//regulation of cell…	GO:0005623//GO:0044464//GO:0043226//GO:0005622//GO:0005634//GO:0044424//GO:0043227//GO:0043229//GO:0005575//GO:0043231	cell//cell part//organelle//intracellular//nucleus//intracellular part//membrane-bounded organelle//intracellular organelle//cellular_component//intracellular membrane-bounded organelle	GO:0046983//GO:0005515//GO:0005488//GO:0003700//GO:0003674	protein dimerization activity//protein binding//binding//DNA-binding transcription factor activity//molecular_function	no KO assigned | (RefSeq) transcription factor LHW-like	http://www.genome.jp/dbget-bin/www_bget?sot:102604574	-	Myc-type, basic helix-loop-helix (bHLH) domain||Transcription factor MYC/MYB N-terminal||Transcription factor LHW
169	PGSC0003DMG400005901	448.968	141.89	1.6618	1.0347e-06	3.2678e-05	UP	GO:0071704//GO:0043170//GO:0006508//GO:0008152//GO:0019538//GO:0044238//GO:0008150	organic substance metabolic process//macromolecule metabolic process//proteolysis//metabolic process//protein metabolic process//primary metabolic process//biological_process	--	--	GO:0003674//GO:0004190//GO:0008233//GO:0016787//GO:0004175//GO:0070011//GO:0070001//GO:0003824	molecular_function//aspartic-type endopeptidase activity//peptidase activity//hydrolase activity//endopeptidase activity//peptidase activity, acting on L-amino acid peptides//aspartic-type peptidase activity//catalytic activity	no KO assigned | (RefSeq) aspartic proteinase nepenthesin-1	http://www.genome.jp/dbget-bin/www_bget?sot:102579167	-	Aspartic peptidase domain||Xylanase inhibitor, N-terminal||Peptidase family A1 domain||Xylanase inhibitor, C-terminal||Aspartic peptidase A1 family||Pepsin-like domain, plant
170	PGSC0003DMG400006129	777.897	374.464	1.0548	0.00025176	0.0032358	UP	--	--	--	--	--	--	no KO assigned | (RefSeq) uncharacterized LOC102593432	http://www.genome.jp/dbget-bin/www_bget?sot:102593432	-	Domain of unknown function DUF630||Domain of unknown function DUF632
171	PGSC0003DMG400006280	1281.02	389.495	1.7176	0.00054497	0.0059959	UP	GO:0008152//GO:0044237//GO:0006793//GO:0016310//GO:0071704//GO:0043170//GO:0044260//GO:0006464//GO:0043412//GO:0044267//GO:0008150//GO:0036211//GO:0044238//GO:0006468//GO:0009987//GO:0019538//GO:0006796	metabolic process//cellular metabolic process//phosphorus metabolic process//phosphorylation//organic substance metabolic process//macromolecule metabolic process//cellular macromolecule metabolic process//cellular protein modification process//macromolecule modification//cellular protein metabolic process//biological_process//protein modification process//primary metabolic process//protein phosp…	GO:0044425//GO:0016020//GO:0005575//GO:0016021//GO:0031224	membrane part//membrane//cellular_component//integral component of membrane//intrinsic component of membrane	GO:0005524//GO:0043168//GO:0032553//GO:0016301//GO:0032550//GO:0032559//GO:0032549//GO:0032555//GO:0005488//GO:0035639//GO:1901265//GO:0043167//GO:0097367//GO:0036094//GO:0003674//GO:0017076//GO:0001883//GO:0030554//GO:0003824//GO:1901363//GO:0000166//GO:0016740//GO:0016772//GO:0001882//GO:0004672//GO:0097159//GO:0016773	ATP binding//anion binding//ribonucleotide binding//kinase activity//purine ribonucleoside binding//adenyl ribonucleotide binding//ribonucleoside binding//purine ribonucleotide binding//binding//purine ribonucleoside triphosphate binding//nucleoside phosphate binding//ion binding//carbohydrate derivative binding//small molecule binding//molecular_function//purine nucleotide binding//purine nucleo…	no KO assigned | (RefSeq) leucine-rich repeat receptor-like serine/threonine-protein kinase BAM3	http://www.genome.jp/dbget-bin/www_bget?sot:102585300	BAM3	Leucine-rich repeat domain, L domain-like||Leucine-rich repeat, typical subtype||Serine/threonine-protein kinase, active site||Leucine-rich repeat-containing N-terminal, plant-type||Leucine-rich repeat||Protein kinase domain||Protein kinase-like domain
172	PGSC0003DMG400006309	121.019	25.9348	2.2223	5.1572e-05	0.00088466	UP	--	--	--	--	--	--	no KO assigned | (RefSeq) uncharacterized LOC102598002	http://www.genome.jp/dbget-bin/www_bget?sot:102598002	-	DC1
173	PGSC0003DMG400006339	8868.91	3768.46	1.2348	4.6308e-07	1.6275e-05	UP	--	--	--	--	--	--	no KO assigned | (RefSeq) glutamic acid-rich protein-like	http://www.genome.jp/dbget-bin/www_bget?sot:102603157	--	--
174	PGSC0003DMG400006354	1006.08	480.556	1.066	0.00022549	0.0029619	UP	GO:0008152//GO:0055114//GO:0008150	metabolic process//oxidation-reduction process//biological_process	--	--	GO:0003674//GO:0043167//GO:0046872//GO:0004497//GO:0005488//GO:0005506//GO:0046906//GO:0046914//GO:0097159//GO:0043169//GO:0016705//GO:0016491//GO:0003824//GO:0020037//GO:1901363	molecular_function//ion binding//metal ion binding//monooxygenase activity//binding//iron ion binding//tetrapyrrole binding//transition metal ion binding//organic cyclic compound binding//cation binding//oxidoreductase activity, acting on paired donors, with incorporation or reduction of molecular oxygen//oxidoreductase activity//catalytic activity//heme binding//heterocyclic compound binding	K20562 biphenyl-4-hydroxylase | (RefSeq) cytochrome P450 CYP736A12-like	http://www.genome.jp/dbget-bin/www_bget?sot:102579200	-	Cytochrome P450, E-class, group I||Cytochrome P450||Cytochrome P450, conserved site
175	PGSC0003DMG400006400	63.5994	0.307304	7.6932	0.00024227	0.0031368	UP	--	--	--	--	--	--	--	--	--	--
176	PGSC0003DMG400006410	799.651	244.131	1.7117	2.3889e-07	9.0444e-06	UP	--	--	GO:0016020//GO:0005575//GO:0016021//GO:0044425//GO:0031224	membrane//cellular_component//integral component of membrane//membrane part//intrinsic component of membrane	--	--	no KO assigned | (RefSeq) pimeloyl-[acyl-carrier protein] methyl ester esterase-like	http://www.genome.jp/dbget-bin/www_bget?sot:102581390	-	Alpha/beta hydrolase fold-1||Alpha/Beta hydrolase fold
177	PGSC0003DMG400006413	647.015	312.474	1.0501	0.00060855	0.0065566	UP	--	--	--	--	--	--	K15448 multifunctional methyltransferase subunit TRM112 | (RefSeq) multifunctional methyltransferase subunit TRM112-like protein At1g22270	http://www.genome.jp/dbget-bin/www_bget?sot:102579838	-	Uncharacterised protein family UPF0434/Trm112
178	PGSC0003DMG400006429	3725.76	1535.17	1.2791	6.1333e-07	2.0647e-05	UP	GO:0006796//GO:0016311//GO:0019538//GO:0044238//GO:0009987//GO:0036211//GO:0008150//GO:0043412//GO:0044267//GO:0044260//GO:0006464//GO:0071704//GO:0043170//GO:0035335//GO:0006793//GO:0044237//GO:0006470//GO:0008152	phosphate-containing compound metabolic process//dephosphorylation//protein metabolic process//primary metabolic process//cellular process//protein modification process//biological_process//macromolecule modification//cellular protein metabolic process//cellular macromolecule metabolic process//cellular protein modification process//organic substance metabolic process//macromolecule metabolic pro…	--	--	GO:0016788//GO:0004725//GO:0042578//GO:0003824//GO:0016791//GO:0003674//GO:0004721//GO:0016787	hydrolase activity, acting on ester bonds//protein tyrosine phosphatase activity//phosphoric ester hydrolase activity//catalytic activity//phosphatase activity//molecular_function//phosphoprotein phosphatase activity//hydrolase activity	K18045 tyrosine-protein phosphatase SIW14 [EC:3.1.3.48] | (RefSeq) probable tyrosine-protein phosphatase At1g05000	http://www.genome.jp/dbget-bin/www_bget?sot:102584322	-	Protein-tyrosine phosphatase, active site||Protein-tyrosine phosphatase-like||Protein-tyrosine phosphatase, SIW14-like||Protein-tyrosine phosphatase SIW14-like, eukaryotic
179	PGSC0003DMG400006454	641.711	284.207	1.175	8.7576e-05	0.0013808	UP	--	--	GO:0044425//GO:0016021//GO:0005575//GO:0016020//GO:0031224	membrane part//integral component of membrane//cellular_component//membrane//intrinsic component of membrane	--	--	no KO assigned | (RefSeq) uncharacterized LOC102601116	http://www.genome.jp/dbget-bin/www_bget?sot:102601116	--	--
180	PGSC0003DMG400006588	79.6879	19.0255	2.0664	0.0068627	0.043203	UP	--	--	--	--	--	--	K03155 timeless | (RefSeq) protein timeless homolog	http://www.genome.jp/dbget-bin/www_bget?sot:102579745	-	Timeless C-terminal
181	PGSC0003DMG400006655	78.4733	19.6149	2.0003	0.0022886	0.018804	UP	--	--	GO:0031224//GO:0005575//GO:0016021//GO:0016020//GO:0044425	intrinsic component of membrane//cellular_component//integral component of membrane//membrane//membrane part	--	--	no KO assigned | (RefSeq) receptor-like protein 12	http://www.genome.jp/dbget-bin/www_bget?sot:102587895	-	Leucine-rich repeat domain, L domain-like||Leucine-rich repeat, typical subtype||Leucine-rich repeat-containing N-terminal, plant-type||Leucine-rich repeat
182	PGSC0003DMG400006663	800.267	222.772	1.8449	0.0021323	0.017769	UP	GO:0008150//GO:0050896//GO:0006950	biological_process//response to stimulus//response to stress	--	--	--	--	no KO assigned | (RefSeq) ci21B; abscisic stress-ripening protein 2	http://www.genome.jp/dbget-bin/www_bget?sot:102583792	-	ABA/WDS induced protein
183	PGSC0003DMG400006844	34.7719	4.28664	3.02	0.0058096	0.038247	UP	GO:0044238//GO:0019538//GO:0008150//GO:0043170//GO:0071704//GO:0008152//GO:0006508	primary metabolic process//protein metabolic process//biological_process//macromolecule metabolic process//organic substance metabolic process//metabolic process//proteolysis	--	--	GO:0070011//GO:0003824//GO:0017171//GO:0008236//GO:0003674//GO:0008233//GO:0004252//GO:0016787//GO:0004175	peptidase activity, acting on L-amino acid peptides//catalytic activity//serine hydrolase activity//serine-type peptidase activity//molecular_function//peptidase activity//serine-type endopeptidase activity//hydrolase activity//endopeptidase activity	--	--	-	Peptidase S8/S53 domain||Peptidase S8, subtilisin, Ser-active site
184	PGSC0003DMG400006845	157.049	26.7753	2.5522	1.7683e-06	5.1953e-05	UP	GO:0008150//GO:0044238//GO:0019538//GO:0008152//GO:0006508//GO:0043170//GO:0071704	biological_process//primary metabolic process//protein metabolic process//metabolic process//proteolysis//macromolecule metabolic process//organic substance metabolic process	--	--	GO:0003824//GO:0017171//GO:0070011//GO:0004252//GO:0016787//GO:0004175//GO:0008236//GO:0003674//GO:0008233	catalytic activity//serine hydrolase activity//peptidase activity, acting on L-amino acid peptides//serine-type endopeptidase activity//hydrolase activity//endopeptidase activity//serine-type peptidase activity//molecular_function//peptidase activity	--	--	-	Cucumisin-like catalytic domain||Peptidase S8, subtilisin, His-active site||Peptidase S8/S53 domain||Peptidase S8 propeptide/proteinase inhibitor I9||Peptidase S8, subtilisin-related
185	PGSC0003DMG400006863	2706.63	876.683	1.6264	4.6906e-06	0.0001195	UP	GO:0090304//GO:0080090//GO:1901362//GO:0009987//GO:0051171//GO:0044238//GO:0046483//GO:0006807//GO:0009058//GO:0010467//GO:0034654//GO:0019438//GO:0010556//GO:0060255//GO:0018130//GO:0050794//GO:0006355//GO:0031326//GO:0008150//GO:0065007//GO:0010468//GO:0032774//GO:2000112//GO:0009889//GO:0034641//GO:0016070//GO:0044249//GO:0031323//GO:0050789//GO:0019222//GO:0006725//GO:0043170//GO:0034645//GO:…	nucleic acid metabolic process//regulation of primary metabolic process//organic cyclic compound biosynthetic process//cellular process//regulation of nitrogen compound metabolic process//primary metabolic process//heterocycle metabolic process//nitrogen compound metabolic process//biosynthetic process//gene expression//nucleobase-containing compound biosynthetic process//aromatic compound biosyn…	GO:0044798//GO:0044464//GO:0043226//GO:0005622//GO:0005634//GO:0016602//GO:0005623//GO:0005667//GO:0090575//GO:0044428//GO:0043227//GO:0032991//GO:0005575//GO:0043231//GO:0044422//GO:0044446//GO:0043229//GO:0044424	nuclear transcription factor complex//cell part//organelle//intracellular//nucleus//CCAAT-binding factor complex//cell//transcription factor complex//RNA polymerase II transcription factor complex//nuclear part//membrane-bounded organelle//protein-containing complex//cellular_component//intracellular membrane-bounded organelle//organelle part//intracellular organelle part//intracellular organelle…	GO:0097159//GO:0003676//GO:0003677//GO:1901363//GO:0003700//GO:0003674//GO:0005488	organic cyclic compound binding//nucleic acid binding//DNA binding//heterocyclic compound binding//DNA-binding transcription factor activity//molecular_function//binding	K08064 nuclear transcription factor Y, alpha | (RefSeq) nuclear transcription factor Y subunit A-7-like	http://www.genome.jp/dbget-bin/www_bget?sot:102589526	-	CCAAT-binding factor, conserved site||Nuclear transcription factor Y subunit A
186	PGSC0003DMG400006914	380.342	160.406	1.2456	0.0041845	0.029863	UP	--	--	--	--	--	--	no KO assigned | (RefSeq) LOB domain-containing protein 25	http://www.genome.jp/dbget-bin/www_bget?sot:102602640	-	Lateral organ boundaries, LOB
187	PGSC0003DMG400007018	249.093	67.6139	1.8813	2.6902e-05	0.0005138	UP	GO:0009987//GO:0043436//GO:0044238//GO:1901362//GO:0044281//GO:0006082//GO:0008652//GO:0009058//GO:0043650//GO:0006807//GO:0019752//GO:0044283//GO:0019438//GO:0044249//GO:1901566//GO:0046417//GO:0008150//GO:1901564//GO:0009423//GO:0009073//GO:0071704//GO:0006725//GO:0009072//GO:0043648//GO:1901576//GO:0006520//GO:0046394//GO:0016053//GO:0044237//GO:0008152//GO:1901360	cellular process//oxoacid metabolic process//primary metabolic process//organic cyclic compound biosynthetic process//small molecule metabolic process//organic acid metabolic process//cellular amino acid biosynthetic process//biosynthetic process//dicarboxylic acid biosynthetic process//nitrogen compound metabolic process//carboxylic acid metabolic process//small molecule biosynthetic process//ar…	--	--	GO:0016765//GO:0003824//GO:0003866//GO:0016740//GO:0003674	transferase activity, transferring alkyl or aryl (other than methyl) groups//catalytic activity//3-phosphoshikimate 1-carboxyvinyltransferase activity//transferase activity//molecular_function	K00800 3-phosphoshikimate 1-carboxyvinyltransferase [EC:2.5.1.19] | (RefSeq) 3-phosphoshikimate 1-carboxyvinyltransferase, chloroplastic	http://www.genome.jp/dbget-bin/www_bget?sot:102600915	-	3-phosphoshikimate 1-carboxyvinyltransferase||3-phosphoshikimate 1-carboxyvinyltransferase, conserved site||Enolpyruvate transferase domain||RNA 3'-terminal phosphate cyclase/enolpyruvate transferase, alpha/beta
188	PGSC0003DMG400007056	309.77	151.814	1.0289	0.0047976	0.033185	UP	GO:0006082//GO:0009058//GO:0044238//GO:0043436//GO:0009987//GO:0044281//GO:0008150//GO:0006629//GO:0019752//GO:1901576//GO:0006631//GO:0071704//GO:0044255//GO:0009813//GO:0032787//GO:0044237//GO:0009812//GO:0008152	organic acid metabolic process//biosynthetic process//primary metabolic process//oxoacid metabolic process//cellular process//small molecule metabolic process//biological_process//lipid metabolic process//carboxylic acid metabolic process//organic substance biosynthetic process//fatty acid metabolic process//organic substance metabolic process//cellular lipid metabolic process//flavonoid biosynth…	GO:0005622//GO:0044464//GO:0043226//GO:0009532//GO:0009570//GO:0044434//GO:0009536//GO:0005623//GO:0044444//GO:0044422//GO:0043229//GO:0044446//GO:0005575//GO:0043231//GO:0044435//GO:0043227//GO:0044424//GO:0005737//GO:0009507	intracellular//cell part//organelle//plastid stroma//chloroplast stroma//chloroplast part//plastid//cell//cytoplasmic part//organelle part//intracellular organelle//intracellular organelle part//cellular_component//intracellular membrane-bounded organelle//plastid part//membrane-bounded organelle//intracellular part//cytoplasm//chloroplast	GO:0008289//GO:0003824//GO:0045430//GO:0031406//GO:0003674//GO:0036094//GO:0005504//GO:0043167//GO:0043177//GO:0005488//GO:0016853//GO:0016872//GO:0033293//GO:0043168	lipid binding//catalytic activity//chalcone isomerase activity//carboxylic acid binding//molecular_function//small molecule binding//fatty acid binding//ion binding//organic acid binding//binding//isomerase activity//intramolecular lyase activity//monocarboxylic acid binding//anion binding	no KO assigned | (RefSeq) fatty-acid-binding protein 3, chloroplastic	http://www.genome.jp/dbget-bin/www_bget?sot:102592573	-	Chalcone isomerase, orthogonal bundle domain||Chalcone isomerase||Chalcone isomerase, 3-layer sandwich
189	PGSC0003DMG400007062	4650.4	2227.94	1.0616	1.9596e-05	0.00039924	UP	GO:0044267//GO:0008150//GO:1901564//GO:0034641//GO:1901566//GO:0044249//GO:0006412//GO:0044238//GO:0009987//GO:0006807//GO:0009058//GO:0019538//GO:0010467//GO:0043603//GO:0008152//GO:0044237//GO:0043043//GO:0044271//GO:0006518//GO:0071704//GO:0034645//GO:0043170//GO:0043604//GO:0009059//GO:0044260//GO:1901576	cellular protein metabolic process//biological_process//organonitrogen compound metabolic process//cellular nitrogen compound metabolic process//organonitrogen compound biosynthetic process//cellular biosynthetic process//translation//primary metabolic process//cellular process//nitrogen compound metabolic process//biosynthetic process//protein metabolic process//gene expression//cellular amide m…	GO:0005623//GO:0044444//GO:0043228//GO:0044464//GO:0043226//GO:0005622//GO:0005737//GO:0044424//GO:0005840//GO:0043232//GO:0032991//GO:0005575//GO:0043229	cell//cytoplasmic part//non-membrane-bounded organelle//cell part//organelle//intracellular//cytoplasm//intracellular part//ribosome//intracellular non-membrane-bounded organelle//protein-containing complex//cellular_component//intracellular organelle	GO:0005198//GO:0003735//GO:0003674	structural molecule activity//structural constituent of ribosome//molecular_function	K02871 large subunit ribosomal protein L13 | (RefSeq) 50S ribosomal protein L13, chloroplastic	http://www.genome.jp/dbget-bin/www_bget?sot:102587160	-	Ribosomal protein L13, bacterial-type||Ribosomal protein L13, conserved site||Ribosomal protein L13
190	PGSC0003DMG400007112	62.573	10.532	2.5708	0.001139	0.010843	UP	--	--	GO:0043227//GO:0005575//GO:0043231//GO:0043229//GO:0044424//GO:0044464//GO:0043226//GO:0005622//GO:0005634//GO:0005623	membrane-bounded organelle//cellular_component//intracellular membrane-bounded organelle//intracellular organelle//intracellular part//cell part//organelle//intracellular//nucleus//cell	GO:0003674//GO:0005488//GO:0097159//GO:0003676//GO:1901363	molecular_function//binding//organic cyclic compound binding//nucleic acid binding//heterocyclic compound binding	no KO assigned | (RefSeq) zinc finger protein WIP3	http://www.genome.jp/dbget-bin/www_bget?sot:102604176	WIP3	Zinc finger C2H2-type
191	PGSC0003DMG400007161	90.9973	18.7403	2.2797	0.000385	0.0045568	UP	GO:0044267//GO:0008150//GO:0009987//GO:0044238//GO:0019538//GO:0006457//GO:0008152//GO:0044237//GO:0043170//GO:0071704//GO:0044260	cellular protein metabolic process//biological_process//cellular process//primary metabolic process//protein metabolic process//protein folding//metabolic process//cellular metabolic process//macromolecule metabolic process//organic substance metabolic process//cellular macromolecule metabolic process	--	--	GO:0030554//GO:0001883//GO:0000166//GO:1901363//GO:0001882//GO:0097159//GO:0005515//GO:0032553//GO:0043168//GO:0005524//GO:0051082//GO:0032549//GO:0032559//GO:0032550//GO:0035639//GO:0005488//GO:0032555//GO:1901265//GO:0043167//GO:0097367//GO:0003674//GO:0036094//GO:0017076	adenyl nucleotide binding//purine nucleoside binding//nucleotide binding//heterocyclic compound binding//nucleoside binding//organic cyclic compound binding//protein binding//ribonucleotide binding//anion binding//ATP binding//unfolded protein binding//ribonucleoside binding//adenyl ribonucleotide binding//purine ribonucleoside binding//purine ribonucleoside triphosphate binding//binding//purine …	--	--	-	GroEL-like apical domain||Chaperonin Cpn60/TCP-1 family||T-complex protein 1, beta subunit||GroEL-like equatorial domain
192	PGSC0003DMG400007170	627.946	212.793	1.5612	0.008248	0.049546	UP	--	--	--	--	GO:0005515//GO:0003674//GO:0008092//GO:0003779//GO:0005488	protein binding//molecular_function//cytoskeletal protein binding//actin binding//binding	no KO assigned | (RefSeq) stomatal closure-related actin-binding protein 3-like	http://www.genome.jp/dbget-bin/www_bget?sot:102582276	-	Stomatal closure-related actin-binding protein, coiled-coil domain||Stomatal closure-related actin-binding protein, fused Ig-PH domain||Stomatal closure-related actin-binding protein, actin-binding domain
193	PGSC0003DMG400007457	458.986	144.081	1.6716	0.004444	0.031215	UP	--	--	--	--	GO:0003674//GO:0005488//GO:0005515//GO:0046983	molecular_function//binding//protein binding//protein dimerization activity	no KO assigned | (RefSeq) transcription factor bHLH30	http://www.genome.jp/dbget-bin/www_bget?sot:102587263	-	Myc-type, basic helix-loop-helix (bHLH) domain
194	PGSC0003DMG400007517	998.751	256.802	1.9595	6.2681e-05	0.0010444	UP	GO:0043170//GO:0071704//GO:0016310//GO:0006464//GO:0044260//GO:0044237//GO:0008152//GO:0006793//GO:0009987//GO:0044238//GO:0006468//GO:0036211//GO:0006796//GO:0019538//GO:0044267//GO:0043412//GO:0008150	macromolecule metabolic process//organic substance metabolic process//phosphorylation//cellular protein modification process//cellular macromolecule metabolic process//cellular metabolic process//metabolic process//phosphorus metabolic process//cellular process//primary metabolic process//protein phosphorylation//protein modification process//phosphate-containing compound metabolic process//prote…	GO:0016020//GO:0016021//GO:0005575//GO:0044425//GO:0031224	membrane//integral component of membrane//cellular_component//membrane part//intrinsic component of membrane	GO:0097367//GO:1901265//GO:0043167//GO:0017076//GO:0003674//GO:0036094//GO:0016301//GO:0032553//GO:0043168//GO:0005524//GO:0035639//GO:0032555//GO:0005488//GO:0032549//GO:0032559//GO:0032550//GO:0004674//GO:0097159//GO:0016773//GO:0000166//GO:1901363//GO:0003824//GO:0030554//GO:0001883//GO:0004672//GO:0001882//GO:0016772//GO:0016740	carbohydrate derivative binding//nucleoside phosphate binding//ion binding//purine nucleotide binding//molecular_function//small molecule binding//kinase activity//ribonucleotide binding//anion binding//ATP binding//purine ribonucleoside triphosphate binding//purine ribonucleotide binding//binding//ribonucleoside binding//adenyl ribonucleotide binding//purine ribonucleoside binding//protein serin…	no KO assigned | (RefSeq) protein NSP-INTERACTING KINASE 1-like	http://www.genome.jp/dbget-bin/www_bget?sot:102601043	-	Leucine-rich repeat||Protein kinase, ATP binding site||Leucine-rich repeat-containing N-terminal, plant-type||Protein kinase domain||Leucine-rich repeat domain, L domain-like||Serine/threonine-protein kinase, active site||Protein kinase-like domain
195	PGSC0003DMG400007526	86.7697	28.8575	1.5882	0.0073153	0.045393	UP	--	--	GO:0016021//GO:0005575//GO:0016020//GO:0044425//GO:0031224	integral component of membrane//cellular_component//membrane//membrane part//intrinsic component of membrane	--	--	--	--	--	--
196	PGSC0003DMG400007528	94.2266	25.4448	1.8888	0.0014425	0.013066	UP	--	--	GO:0044425//GO:0005575//GO:0016021//GO:0016020//GO:0031224	membrane part//cellular_component//integral component of membrane//membrane//intrinsic component of membrane	--	--	--	--	--	--
197	PGSC0003DMG400007596	39.161	5.04193	2.9574	0.0044059	0.030999	UP	GO:0008152//GO:0071704//GO:1901576//GO:0006629//GO:0008150//GO:0044238//GO:0008610//GO:0009058//GO:0055114	metabolic process//organic substance metabolic process//organic substance biosynthetic process//lipid metabolic process//biological_process//primary metabolic process//lipid biosynthetic process//biosynthetic process//oxidation-reduction process	GO:0044425//GO:0016020//GO:0016021//GO:0005575//GO:0031224	membrane part//membrane//integral component of membrane//cellular_component//intrinsic component of membrane	GO:0005506//GO:0005488//GO:0046872//GO:0043167//GO:0003674//GO:0003824//GO:0016491//GO:0043169//GO:0046914	iron ion binding//binding//metal ion binding//ion binding//molecular_function//catalytic activity//oxidoreductase activity//cation binding//transition metal ion binding	K19706 dihydroceramide fatty acyl 2-hydroxylase [EC:1.14.18.7] | (RefSeq) fatty acid 2-hydroxylase 1-like	http://www.genome.jp/dbget-bin/www_bget?sot:102601993	-	Fatty acid hydroxylase
198	PGSC0003DMG400007621	93.2636	23.5803	1.9837	0.0019061	0.016247	UP	--	--	--	--	--	--	no KO assigned | (RefSeq) protein GAST1-like	http://www.genome.jp/dbget-bin/www_bget?sot:102603432	-	Gibberellin regulated protein
199	PGSC0003DMG400007893	923.372	401.613	1.2011	1.8073e-05	0.0003746	UP	GO:0051179//GO:0008150//GO:0051234//GO:0006810	localization//biological_process//establishment of localization//transport	--	--	GO:0005215//GO:0003674	transporter activity//molecular_function	K03098 apolipoprotein D and lipocalin family protein | (RefSeq) TIL; temperature-induced lipocalin-1-like	http://www.genome.jp/dbget-bin/www_bget?sot:102588695	-	Calycin||Lipocalin, ApoD type||Lipocalin, bacterial||Lipocalin/cytosolic fatty-acid binding domain||Lipocalin family conserved site
200	PGSC0003DMG400007916	49.9249	9.7066	2.3627	0.0053134	0.035768	UP	--	--	GO:0031224//GO:0044425//GO:0016020//GO:0016021//GO:0005575	intrinsic component of membrane//membrane part//membrane//integral component of membrane//cellular_component	--	--	--	--	--	--
201	PGSC0003DMG400007964	37.0027	1.59744	4.5338	0.0012172	0.011418	UP	--	--	--	--	GO:0046983//GO:0005515//GO:0005488//GO:0003674	protein dimerization activity//protein binding//binding//molecular_function	no KO assigned | (RefSeq) transcription factor HEC2-like	http://www.genome.jp/dbget-bin/www_bget?sot:102592363	-	Myc-type, basic helix-loop-helix (bHLH) domain
202	PGSC0003DMG400008001	185.912	8.85141	4.3926	0.004623	0.032186	UP	--	--	GO:0043226//GO:0044464//GO:0005634//GO:0005622//GO:0005623//GO:0043227//GO:0043229//GO:0043231//GO:0005575//GO:0044424	organelle//cell part//nucleus//intracellular//cell//membrane-bounded organelle//intracellular organelle//intracellular membrane-bounded organelle//cellular_component//intracellular part	--	--	K14505 cyclin D3, plant | (RefSeq) CYCD3.3; D-type cyclin family 3 subgroup 3	http://www.genome.jp/dbget-bin/www_bget?sot:102577538	-	Cyclin-like||Cyclin, N-terminal||Cyclin, C-terminal domain
203	PGSC0003DMG400008006	916.844	410.906	1.1579	0.0080983	0.048813	UP	--	--	--	--	--	--	K10395 kinesin family member 4/21/27 | (RefSeq) kinesin-like protein FRA1	http://www.genome.jp/dbget-bin/www_bget?sot:102588053	--	--
204	PGSC0003DMG400008089	798.689	392.579	1.0247	0.00034678	0.0041889	UP	GO:0034220//GO:0055085//GO:0006811//GO:0051179//GO:0009987//GO:0051234//GO:0006810//GO:0008150	ion transmembrane transport//transmembrane transport//ion transport//localization//cellular process//establishment of localization//transport//biological_process	GO:0005575//GO:0016021//GO:0016020//GO:0044425//GO:0031224	cellular_component//integral component of membrane//membrane//membrane part//intrinsic component of membrane	GO:0003674//GO:0005216//GO:0015267//GO:0022838//GO:0005215//GO:0022803//GO:0022857//GO:0015075	molecular_function//ion channel activity//channel activity//substrate-specific channel activity//transporter activity//passive transmembrane transporter activity//transmembrane transporter activity//ion transmembrane transporter activity	K05391 cyclic nucleotide gated channel, other eukaryote | (RefSeq) putative cyclic nucleotide-gated ion channel 15	http://www.genome.jp/dbget-bin/www_bget?sot:102583901	-	Ion transport domain||RmlC-like jelly roll fold||Cyclic nucleotide-binding domain||Cyclic nucleotide-binding-like||IQ motif, EF-hand binding site
205	PGSC0003DMG400008112	113.363	21.4486	2.402	0.0022016	0.018276	UP	GO:0006952//GO:0050896//GO:0008150//GO:0006950	defense response//response to stimulus//biological_process//response to stress	GO:0031224//GO:0016020//GO:0005575//GO:0016021//GO:0044425	intrinsic component of membrane//membrane//cellular_component//integral component of membrane//membrane part	--	--	K08472 mlo protein | (RefSeq) MLO-like protein 6	http://www.genome.jp/dbget-bin/www_bget?sot:102602773	-	Mlo-related protein
206	PGSC0003DMG400008137	80.721	7.72132	3.386	1.0673e-05	0.00024182	UP	GO:0008152//GO:0008150	metabolic process//biological_process	--	--	GO:0016757//GO:0003674//GO:0016758//GO:0016740//GO:0003824	transferase activity, transferring glycosyl groups//molecular_function//transferase activity, transferring hexosyl groups//transferase activity//catalytic activity	K13495 cis-zeatin O-glucosyltransferase [EC:2.4.1.215] | (RefSeq) zeatin O-glucosyltransferase-like	http://www.genome.jp/dbget-bin/www_bget?sot:102592693	-	UDP-glycosyltransferase family, conserved site||UDP-glucuronosyl/UDP-glucosyltransferase
207	PGSC0003DMG400008172	82.295	16.6812	2.3026	0.00089603	0.0089592	UP	--	--	--	--	--	--	no KO assigned | (RefSeq) protein IQ-DOMAIN 14-like	http://www.genome.jp/dbget-bin/www_bget?sot:102589668	-	Domain of unknown function DUF4005
208	PGSC0003DMG400008188	296.867	84.2697	1.8167	1.713e-06	5.052e-05	UP	GO:0044237//GO:0051252//GO:0008152//GO:0006139//GO:1901360//GO:1903506//GO:0044271//GO:0043170//GO:0034645//GO:0006351//GO:0071704//GO:0097659//GO:0019222//GO:0006725//GO:2001141//GO:1901576//GO:0044260//GO:0019219//GO:0009059//GO:0018130//GO:0050794//GO:0034654//GO:0019438//GO:0010556//GO:0060255//GO:0009889//GO:0034641//GO:0016070//GO:0044249//GO:0031323//GO:0050789//GO:0006355//GO:0031326//GO:…	cellular metabolic process//regulation of RNA metabolic process//metabolic process//nucleobase-containing compound metabolic process//organic cyclic compound metabolic process//regulation of nucleic acid-templated transcription//cellular nitrogen compound biosynthetic process//macromolecule metabolic process//cellular macromolecule biosynthetic process//transcription, DNA-templated//organic subst…	--	--	GO:0005488//GO:0003700//GO:0003674//GO:0003676//GO:0003677//GO:1901363//GO:0043565//GO:0097159	binding//DNA-binding transcription factor activity//molecular_function//nucleic acid binding//DNA binding//heterocyclic compound binding//sequence-specific DNA binding//organic cyclic compound binding	no KO assigned | (RefSeq) probable WRKY transcription factor 51	http://www.genome.jp/dbget-bin/www_bget?sot:102602279	-	WRKY domain
209	PGSC0003DMG400008318	60.151	11.9765	2.3284	0.0020281	0.017082	UP	--	--	--	--	--	--	--	--	--	--
210	PGSC0003DMG400008643	30.8446	2.51935	3.6139	0.0065112	0.041577	UP	--	--	GO:0031224//GO:0016021//GO:0044425//GO:0005575//GO:0016020	intrinsic component of membrane//integral component of membrane//membrane part//cellular_component//membrane	--	--	no KO assigned | (RefSeq) uncharacterized LOC102593994	http://www.genome.jp/dbget-bin/www_bget?sot:102593994	-	Armadillo-type fold||Armadillo-like helical
211	PGSC0003DMG400008659	424.308	207.585	1.0314	0.0023701	0.019305	UP	GO:0023052//GO:0008150//GO:0050789//GO:0009987//GO:0050794//GO:0050896//GO:0065007//GO:0007165//GO:0035556//GO:0007264//GO:0051716//GO:0007154	signaling//biological_process//regulation of biological process//cellular process//regulation of cellular process//response to stimulus//biological regulation//signal transduction//intracellular signal transduction//small GTPase mediated signal transduction//cellular response to stimulus//cell communication	GO:0016020//GO:0005575//GO:0005623//GO:0044464//GO:0005622	membrane//cellular_component//cell//cell part//intracellular	GO:0003824//GO:1901363//GO:0019001//GO:0097159//GO:0016462//GO:0032553//GO:0032550//GO:0016787//GO:0032555//GO:0035639//GO:0043167//GO:0036094//GO:0016818//GO:0003674//GO:0001883//GO:0005525//GO:0000166//GO:0001882//GO:0032561//GO:0017111//GO:0043168//GO:0003924//GO:0032549//GO:0016817//GO:0005488//GO:1901265//GO:0097367//GO:0017076	catalytic activity//heterocyclic compound binding//guanyl nucleotide binding//organic cyclic compound binding//pyrophosphatase activity//ribonucleotide binding//purine ribonucleoside binding//hydrolase activity//purine ribonucleotide binding//purine ribonucleoside triphosphate binding//ion binding//small molecule binding//hydrolase activity, acting on acid anhydrides, in phosphorus-containing anh…	K04392 Ras-related C3 botulinum toxin substrate 1 | (RefSeq) rac-like GTP-binding protein ARAC7	http://www.genome.jp/dbget-bin/www_bget?sot:102578267	-	P-loop containing nucleoside triphosphate hydrolase||Small GTP-binding protein domain||Small GTPase superfamily||Small GTPase superfamily, Rho type
212	PGSC0003DMG400008673	8542.8	1773.89	2.2678	6.9648e-20	3.0634e-17	UP	GO:1901135//GO:0006030//GO:1901575//GO:0006807//GO:0044238//GO:0071554//GO:0006026//GO:0006032//GO:0044237//GO:1901071//GO:0043170//GO:0016998//GO:0008150//GO:1901564//GO:1901072//GO:1901136//GO:0006040//GO:0046348//GO:0009056//GO:0009987//GO:0009057//GO:0044248//GO:0044036//GO:0008152//GO:1901565//GO:0044260//GO:0005975//GO:0006022//GO:0071704	carbohydrate derivative metabolic process//chitin metabolic process//organic substance catabolic process//nitrogen compound metabolic process//primary metabolic process//cell wall organization or biogenesis//aminoglycan catabolic process//chitin catabolic process//cellular metabolic process//glucosamine-containing compound metabolic process//macromolecule metabolic process//cell wall macromolecul…	--	--	GO:0016798//GO:0004568//GO:0003824//GO:0016787//GO:0004553//GO:0003674	hydrolase activity, acting on glycosyl bonds//chitinase activity//catalytic activity//hydrolase activity//hydrolase activity, hydrolyzing O-glycosyl compounds//molecular_function	K01183 chitinase [EC:3.2.1.14] | (RefSeq) SK2, chitinase; basic endochitinase	http://www.genome.jp/dbget-bin/www_bget?sot:102590998	-	Glycoside hydrolase, family 19, catalytic||Lysozyme-like domain||Glycoside hydrolase, family 19
213	PGSC0003DMG400008724	813.117	159.255	2.3521	1.7938e-14	3.4837e-12	UP	GO:0008152//GO:0055114//GO:0008150	metabolic process//oxidation-reduction process//biological_process	--	--	GO:0003674//GO:0003824//GO:0016491	molecular_function//catalytic activity//oxidoreductase activity	no KO assigned | (RefSeq) putative quinone-oxidoreductase homolog, chloroplastic	http://www.genome.jp/dbget-bin/www_bget?sot:102582629	-	NAD(P)-binding domain||GroES-like||Alcohol dehydrogenase, N-terminal||Polyketide synthase, enoylreductase domain
214	PGSC0003DMG400008731	11222.4	4528.53	1.3093	6.0223e-08	2.7882e-06	UP	--	--	--	--	--	--	--	--	--	--
215	PGSC0003DMG400008749	107.831	0	Inf	8.5186e-05	0.0013531	UP	GO:0008152//GO:0071704//GO:0008150//GO:0016042//GO:0009056//GO:0006950//GO:0006629//GO:0050896//GO:0006952//GO:1901575//GO:0044238	metabolic process//organic substance metabolic process//biological_process//lipid catabolic process//catabolic process//response to stress//lipid metabolic process//response to stimulus//defense response//organic substance catabolic process//primary metabolic process	GO:0005737//GO:0005575//GO:0043231//GO:0043227//GO:0005773//GO:0043226//GO:0044424//GO:0043229//GO:0044444//GO:0005623//GO:0005622//GO:0044464	cytoplasm//cellular_component//intracellular membrane-bounded organelle//membrane-bounded organelle//vacuole//organelle//intracellular part//intracellular organelle//cytoplasmic part//cell//intracellular//cell part	GO:0016787//GO:0003674//GO:0003824//GO:0045735	hydrolase activity//molecular_function//catalytic activity//nutrient reservoir activity	no KO assigned | (RefSeq) Patatin-01, Patatin-02, Patatin-03, Patatin-05, Patatin-07, Patatin-13, Patatin-16, pat1, pat1-k1; patatin-05-like	http://www.genome.jp/dbget-bin/www_bget?sot:102605260	-	Patatin-like phospholipase domain||Acyl transferase/acyl hydrolase/lysophospholipase
216	PGSC0003DMG400008932	1496.15	440.237	1.7649	8.3276e-05	0.0013263	UP	GO:0050896//GO:0046686//GO:0044237//GO:0006796//GO:0010035//GO:0009987//GO:0010038//GO:0042221//GO:0008150//GO:0006793//GO:0008152	response to stimulus//response to cadmium ion//cellular metabolic process//phosphate-containing compound metabolic process//response to inorganic substance//cellular process//response to metal ion//response to chemical//biological_process//phosphorus metabolic process//metabolic process	GO:0005622//GO:0044464//GO:0044444//GO:0005623//GO:0044424//GO:0005829//GO:0005575//GO:0005737	intracellular//cell part//cytoplasmic part//cell//intracellular part//cytosol//cellular_component//cytoplasm	GO:0043169//GO:0046872//GO:0004427//GO:0016817//GO:0005488//GO:0016462//GO:0003824//GO:0016818//GO:0003674//GO:0043167//GO:0016787//GO:0000287	cation binding//metal ion binding//inorganic diphosphatase activity//hydrolase activity, acting on acid anhydrides//binding//pyrophosphatase activity//catalytic activity//hydrolase activity, acting on acid anhydrides, in phosphorus-containing anhydrides//molecular_function//ion binding//hydrolase activity//magnesium ion binding	K01507 inorganic pyrophosphatase [EC:3.6.1.1] | (RefSeq) ppa2; soluble inorganic pyrophosphatase 4	http://www.genome.jp/dbget-bin/www_bget?sot:102587659	AtPPa4	Inorganic pyrophosphatase
217	PGSC0003DMG400008960	120.031	26.9401	2.1556	0.0010846	0.010429	UP	GO:0055114//GO:0008150//GO:0008152	oxidation-reduction process//biological_process//metabolic process	GO:0005575//GO:0016020//GO:0031224//GO:0016021//GO:0044425	cellular_component//membrane//intrinsic component of membrane//integral component of membrane//membrane part	GO:0097159//GO:0016491//GO:0003824//GO:1901363//GO:0003674//GO:0043167//GO:0005506//GO:0046906//GO:0046914//GO:0043169//GO:0016705//GO:0020037//GO:0046872//GO:0005488	organic cyclic compound binding//oxidoreductase activity//catalytic activity//heterocyclic compound binding//molecular_function//ion binding//iron ion binding//tetrapyrrole binding//transition metal ion binding//cation binding//oxidoreductase activity, acting on paired donors, with incorporation or reduction of molecular oxygen//heme binding//metal ion binding//binding	no KO assigned | (RefSeq) cytochrome P450 94C1-like	http://www.genome.jp/dbget-bin/www_bget?sot:102590366	-	Cytochrome P450, E-class, group I||Cytochrome P450
218	PGSC0003DMG400009109	109.118	20.5334	2.4099	0.0060698	0.03947	UP	GO:0044262//GO:0071704//GO:0005984//GO:1901576//GO:0005975//GO:0009311//GO:0008152//GO:0006793//GO:0009987//GO:0009312//GO:0006796//GO:0046351//GO:0008150//GO:0016051//GO:0044249//GO:0005992//GO:0044237//GO:0044238//GO:0016311//GO:0009058//GO:0005991//GO:0034637	cellular carbohydrate metabolic process//organic substance metabolic process//disaccharide metabolic process//organic substance biosynthetic process//carbohydrate metabolic process//oligosaccharide metabolic process//metabolic process//phosphorus metabolic process//cellular process//oligosaccharide biosynthetic process//phosphate-containing compound metabolic process//disaccharide biosynthetic pr…	--	--	GO:0003674//GO:0016791//GO:0016787//GO:0003824//GO:0016788//GO:0019203//GO:0004805//GO:0042578	molecular_function//phosphatase activity//hydrolase activity//catalytic activity//hydrolase activity, acting on ester bonds//carbohydrate phosphatase activity//trehalose-phosphatase activity//phosphoric ester hydrolase activity	K01087 trehalose 6-phosphate phosphatase [EC:3.1.3.12] | (RefSeq) probable trehalose-phosphate phosphatase 2	http://www.genome.jp/dbget-bin/www_bget?sot:102584086	-	HAD-superfamily hydrolase, subfamily IIB||Trehalose-phosphatase||HAD-like domain
219	PGSC0003DMG400009208	87.3813	6.75152	3.694	0.0027168	0.021426	UP	GO:0009987//GO:0015893//GO:0006855//GO:0006810//GO:0051234//GO:0008150//GO:0042221//GO:0055085//GO:0051179//GO:0042493//GO:0050896	cellular process//drug transport//drug transmembrane transport//transport//establishment of localization//biological_process//response to chemical//transmembrane transport//localization//response to drug//response to stimulus	GO:0005575//GO:0016020//GO:0016021//GO:0044425//GO:0031224	cellular_component//membrane//integral component of membrane//membrane part//intrinsic component of membrane	GO:0003674//GO:0015291//GO:0015297//GO:0015238//GO:0022857//GO:0005215//GO:0022804	molecular_function//secondary active transmembrane transporter activity//antiporter activity//drug transmembrane transporter activity//transmembrane transporter activity//transporter activity//active transmembrane transporter activity	K03327 multidrug resistance protein, MATE family | (RefSeq) protein DETOXIFICATION 54	http://www.genome.jp/dbget-bin/www_bget?sot:102595555	-	Multi antimicrobial extrusion protein
220	PGSC0003DMG400009405	225.454	46.3596	2.2819	1.1082e-05	0.00024941	UP	--	--	GO:0031224//GO:0044425//GO:0016021//GO:0016020//GO:0005575	intrinsic component of membrane//membrane part//integral component of membrane//membrane//cellular_component	--	--	K19038 E3 ubiquitin-protein ligase ATL41 [EC:2.3.2.27] | (RefSeq) E3 ubiquitin-protein ligase ATL41-like	http://www.genome.jp/dbget-bin/www_bget?sot:102592686	-	Zinc finger, RING-type||Zinc finger, RING/FYVE/PHD-type
221	PGSC0003DMG400009434	76.7947	4.99404	3.9427	9.2715e-07	2.9677e-05	UP	--	--	--	--	--	--	--	--	--	--
222	PGSC0003DMG400009442	21.6173	0.723538	4.901	0.0032296	0.024405	UP	--	--	--	--	--	--	no KO assigned | (RefSeq) VQ motif-containing protein 22-like	http://www.genome.jp/dbget-bin/www_bget?sot:102597894	-	VQ
223	PGSC0003DMG400009743	791.369	379.218	1.0613	0.0003287	0.0040094	UP	GO:0006793//GO:0008152//GO:0044260//GO:0071704//GO:0008150//GO:0043412//GO:0006796//GO:0009987//GO:0044237//GO:0006464//GO:0016310//GO:0043170//GO:0044267//GO:0019538//GO:0036211//GO:0044238//GO:0006468	phosphorus metabolic process//metabolic process//cellular macromolecule metabolic process//organic substance metabolic process//biological_process//macromolecule modification//phosphate-containing compound metabolic process//cellular process//cellular metabolic process//cellular protein modification process//phosphorylation//macromolecule metabolic process//cellular protein metabolic process//pro…	--	--	GO:0016301//GO:0003674//GO:0016740//GO:0003824//GO:0016772//GO:0004672//GO:0016773	kinase activity//molecular_function//transferase activity//catalytic activity//transferase activity, transferring phosphorus-containing groups//protein kinase activity//phosphotransferase activity, alcohol group as acceptor	no KO assigned | (RefSeq) receptor-like serine/threonine-protein kinase ALE2	http://www.genome.jp/dbget-bin/www_bget?sot:102580082	-	Serine-threonine/tyrosine-protein kinase, catalytic domain||Protein kinase-like domain
224	PGSC0003DMG400009782	311.101	123.731	1.3302	0.00070347	0.0073644	UP	--	--	--	--	--	--	no KO assigned | (RefSeq) uncharacterized LOC102593466	http://www.genome.jp/dbget-bin/www_bget?sot:102593466	-	SWIB/MDM2 domain||SWIB domain
225	PGSC0003DMG400009852	147.884	54.4216	1.4422	0.0031395	0.023875	UP	--	--	--	--	--	--	no KO assigned | (RefSeq) uncharacterized LOC102597431	http://www.genome.jp/dbget-bin/www_bget?sot:102597431	--	--
226	PGSC0003DMG400009864	112.903	36.5427	1.6274	0.0030313	0.023235	UP	--	--	--	--	--	--	no KO assigned | (RefSeq) uncharacterized LOC102598014	http://www.genome.jp/dbget-bin/www_bget?sot:102598014	--	--
227	PGSC0003DMG400009886	745.56	222.488	1.7446	1.7399e-07	6.9384e-06	UP	GO:0055085//GO:0051179//GO:0009987//GO:0008150//GO:0006810//GO:0051234	transmembrane transport//localization//cellular process//biological_process//transport//establishment of localization	GO:0016021//GO:0044425//GO:0031224//GO:0016020//GO:0005575	integral component of membrane//membrane part//intrinsic component of membrane//membrane//cellular_component	GO:0005215//GO:0003674	transporter activity//molecular_function	no KO assigned | (RefSeq) tetracycline resistance protein, class A-like	http://www.genome.jp/dbget-bin/www_bget?sot:102583153	-	Tetracycline resistance protein TetA/multidrug resistance protein MdtG||Major facilitator superfamily||Major facilitator superfamily domain
228	PGSC0003DMG400009919	248.693	106.354	1.2255	0.0015189	0.013634	UP	--	--	GO:0016021//GO:0044425//GO:0031224//GO:0016020//GO:0005575	integral component of membrane//membrane part//intrinsic component of membrane//membrane//cellular_component	--	--	no KO assigned | (RefSeq) RING-H2 finger protein ATL80	http://www.genome.jp/dbget-bin/www_bget?sot:102579592	-	Zinc finger, RING-type||Zinc finger, RING/FYVE/PHD-type
229	PGSC0003DMG400009985	329.724	66.5689	2.3083	9.8759e-05	0.0015265	UP	GO:0006796//GO:0009987//GO:0008150//GO:0043412//GO:0044260//GO:0071704//GO:0006793//GO:0008152//GO:0019538//GO:0044238//GO:0006468//GO:0036211//GO:0044267//GO:0006464//GO:0043170//GO:0016310//GO:0044237	phosphate-containing compound metabolic process//cellular process//biological_process//macromolecule modification//cellular macromolecule metabolic process//organic substance metabolic process//phosphorus metabolic process//metabolic process//protein metabolic process//primary metabolic process//protein phosphorylation//protein modification process//cellular protein metabolic process//cellular pr…	--	--	GO:0097159//GO:0016740//GO:1901363//GO:0030554//GO:0003824//GO:0003674//GO:0036094//GO:0043167//GO:0035639//GO:0032555//GO:0032550//GO:0016301//GO:0032553//GO:0005524//GO:0016773//GO:0004674//GO:0004672//GO:0001882//GO:0016772//GO:0000166//GO:0001883//GO:0017076//GO:0097367//GO:1901265//GO:0005488//GO:0032559//GO:0032549//GO:0043168	organic cyclic compound binding//transferase activity//heterocyclic compound binding//adenyl nucleotide binding//catalytic activity//molecular_function//small molecule binding//ion binding//purine ribonucleoside triphosphate binding//purine ribonucleotide binding//purine ribonucleoside binding//kinase activity//ribonucleotide binding//ATP binding//phosphotransferase activity, alcohol group as acc…	K04733 interleukin-1 receptor-associated kinase 4 [EC:2.7.11.1] | (RefSeq) probable serine/threonine-protein kinase NAK	http://www.genome.jp/dbget-bin/www_bget?sot:102600547	-	Protein kinase-like domain||Serine-threonine/tyrosine-protein kinase, catalytic domain||Serine/threonine-protein kinase, active site||Protein kinase domain||Protein kinase, ATP binding site
230	PGSC0003DMG400009995	620.806	62.6248	3.3093	0.0018417	0.015838	UP	GO:0055085//GO:0051179//GO:0009987//GO:0051234//GO:0006810//GO:0008150	transmembrane transport//localization//cellular process//establishment of localization//transport//biological_process	GO:0016021//GO:0044425//GO:0031224//GO:0005575//GO:0016020	integral component of membrane//membrane part//intrinsic component of membrane//cellular_component//membrane	GO:0005215//GO:0003674//GO:0022857	transporter activity//molecular_function//transmembrane transporter activity	K08176 MFS transporter, PHS family, inorganic phosphate transporter | (RefSeq) probable inorganic phosphate transporter 1-9	http://www.genome.jp/dbget-bin/www_bget?sot:102581157	-	Sugar transporter, conserved site||Major facilitator superfamily domain||Major facilitator, sugar transporter-like
231	PGSC0003DMG400010027	272.495	50.057	2.4446	0.0010116	0.0098756	UP	GO:0019219//GO:0009059//GO:0019222//GO:0043170//GO:1901360//GO:0006139//GO:0044271//GO:0044237//GO:0006807//GO:0009058//GO:0010467//GO:0090304//GO:0044238//GO:0046483//GO:0032774//GO:0010468//GO:0065007//GO:0016070//GO:0034641//GO:0060255//GO:0010556//GO:0034654//GO:0050794//GO:0018130//GO:0044260//GO:1901576//GO:2001141//GO:0006725//GO:0097659//GO:0071704//GO:0034645//GO:0006351//GO:1903506//GO:…	regulation of nucleobase-containing compound metabolic process//macromolecule biosynthetic process//regulation of metabolic process//macromolecule metabolic process//organic cyclic compound metabolic process//nucleobase-containing compound metabolic process//cellular nitrogen compound biosynthetic process//cellular metabolic process//nitrogen compound metabolic process//biosynthetic process//gene…	GO:0043229//GO:0044424//GO:0005622//GO:0005634//GO:0044464//GO:0005623//GO:0005575//GO:0043231//GO:0043227//GO:0043226	intracellular organelle//intracellular part//intracellular//nucleus//cell part//cell//cellular_component//intracellular membrane-bounded organelle//membrane-bounded organelle//organelle	GO:0005488//GO:0003677//GO:0003674//GO:0097159//GO:0003676//GO:1901363	binding//DNA binding//molecular_function//organic cyclic compound binding//nucleic acid binding//heterocyclic compound binding	no KO assigned | (RefSeq) dof zinc finger protein DOF3.5-like	http://www.genome.jp/dbget-bin/www_bget?sot:102595797	-	Zinc finger, Dof-type
232	PGSC0003DMG400010128	353.361	0.669073	9.0448	0.0010117	0.0098756	UP	GO:0006508//GO:0010466//GO:0008152//GO:0050790//GO:0044092//GO:0044260//GO:0010951//GO:0010605//GO:0071704//GO:0008150//GO:0031323//GO:0050789//GO:0043086//GO:0051246//GO:0048519//GO:0080090//GO:0009987//GO:0009892//GO:0051336//GO:0044237//GO:0032268//GO:0019222//GO:0043170//GO:0030162//GO:0065007//GO:0048523//GO:0051346//GO:0051248//GO:0052548//GO:0060255//GO:0050794//GO:0032269//GO:0044267//GO:…	proteolysis//negative regulation of peptidase activity//metabolic process//regulation of catalytic activity//negative regulation of molecular function//cellular macromolecule metabolic process//negative regulation of endopeptidase activity//negative regulation of macromolecule metabolic process//organic substance metabolic process//biological_process//regulation of cellular metabolic process//reg…	GO:0005737//GO:0043231//GO:0005575//GO:0016020//GO:0043227//GO:0005773//GO:0043226//GO:0044425//GO:0044424//GO:0043229//GO:0016021//GO:0044444//GO:0005623//GO:0005622//GO:0031224//GO:0044464	cytoplasm//intracellular membrane-bounded organelle//cellular_component//membrane//membrane-bounded organelle//vacuole//organelle//membrane part//intracellular part//intracellular organelle//integral component of membrane//cytoplasmic part//cell//intracellular//intrinsic component of membrane//cell part	GO:0016787//GO:0030234//GO:0004866//GO:0003674//GO:0061134//GO:0003824//GO:0004867//GO:0030414//GO:0098772//GO:0008233//GO:0004857//GO:0061135	hydrolase activity//enzyme regulator activity//endopeptidase inhibitor activity//molecular_function//peptidase regulator activity//catalytic activity//serine-type endopeptidase inhibitor activity//peptidase inhibitor activity//molecular function regulator//peptidase activity//enzyme inhibitor activity//endopeptidase regulator activity	no KO assigned | (RefSeq) AM66, KTI-B, PIG, PIGEN1, PKI1, PSPI-21, STPIA, STPIB, gCDI-B1, pF4, pKEN14-28; Kunitz-type protease inhibitor precursor	http://www.genome.jp/dbget-bin/www_bget?sot:102577642	-	Kunitz inhibitor ST1-like||Proteinase inhibitor I3, Kunitz legume
233	PGSC0003DMG400010158	158.435	39.8434	1.9915	5.3206e-05	0.00090955	UP	--	--	--	--	GO:0003779//GO:0005488//GO:0005515//GO:0003674//GO:0008092	actin binding//binding//protein binding//molecular_function//cytoskeletal protein binding	no KO assigned | (RefSeq) kinase-interacting family protein	http://www.genome.jp/dbget-bin/www_bget?sot:102601518	-	Protein Networked (NET), actin-binding (NAB) domain
234	PGSC0003DMG400010215	116.662	34.0914	1.7749	0.00090392	0.0090118	UP	GO:0071704//GO:0006508//GO:0008152//GO:0008150//GO:0043170//GO:0019538//GO:0044238	organic substance metabolic process//proteolysis//metabolic process//biological_process//macromolecule metabolic process//protein metabolic process//primary metabolic process	--	--	GO:0003674//GO:0008234//GO:0016787//GO:0070011//GO:0003824//GO:0008233	molecular_function//cysteine-type peptidase activity//hydrolase activity//peptidase activity, acting on L-amino acid peptides//catalytic activity//peptidase activity	K13441 cysteine protease | (RefSeq) RCR3; fruit bromelain-like	http://www.genome.jp/dbget-bin/www_bget?sot:102595400	-	Cysteine peptidase, cysteine active site||Cysteine peptidase, histidine active site||Peptidase C1A||Cathepsin propeptide inhibitor domain (I29)||Peptidase C1A, papain C-terminal||Cysteine peptidase, asparagine active site
235	PGSC0003DMG400010224	10791.2	3365.25	1.6811	3.1328e-08	1.5748e-06	UP	GO:0008150//GO:0006508//GO:0008152//GO:0071704//GO:0019538//GO:0044238//GO:0043170	biological_process//proteolysis//metabolic process//organic substance metabolic process//protein metabolic process//primary metabolic process//macromolecule metabolic process	--	--	GO:0003824//GO:0070011//GO:0016787//GO:0003674//GO:0008234//GO:0008233	catalytic activity//peptidase activity, acting on L-amino acid peptides//hydrolase activity//molecular_function//cysteine-type peptidase activity//peptidase activity	no KO assigned | (RefSeq) zingipain-2-like	http://www.genome.jp/dbget-bin/www_bget?sot:102599335	-	Cathepsin propeptide inhibitor domain (I29)||Peptidase C1A||Cysteine peptidase, histidine active site||Cysteine peptidase, cysteine active site||Cysteine peptidase, asparagine active site||Peptidase C1A, papain C-terminal
236	PGSC0003DMG400010225	91.6772	19.745	2.2151	0.00064331	0.0068481	UP	GO:0008152//GO:0006508//GO:0071704//GO:0008150//GO:0043170//GO:0044238//GO:0019538	metabolic process//proteolysis//organic substance metabolic process//biological_process//macromolecule metabolic process//primary metabolic process//protein metabolic process	--	--	GO:0016787//GO:0003674//GO:0008234//GO:0003824//GO:0070011//GO:0008233	hydrolase activity//molecular_function//cysteine-type peptidase activity//catalytic activity//peptidase activity, acting on L-amino acid peptides//peptidase activity	no KO assigned | (RefSeq) zingipain-2-like	http://www.genome.jp/dbget-bin/www_bget?sot:102599662	-	Cysteine peptidase, asparagine active site||Peptidase C1A, papain C-terminal||Cathepsin propeptide inhibitor domain (I29)||Peptidase C1A||Cysteine peptidase, histidine active site||Cysteine peptidase, cysteine active site
237	PGSC0003DMG400010246	467.592	222.469	1.0716	0.0035367	0.026189	UP	--	--	--	--	--	--	no KO assigned | (RefSeq) protein CHUP1, chloroplastic	http://www.genome.jp/dbget-bin/www_bget?sot:102600315	--	--
238	PGSC0003DMG400010267	92.2302	20.5938	2.163	0.00065773	0.0069709	UP	--	--	--	--	--	--	no KO assigned | (RefSeq) remorin-like	http://www.genome.jp/dbget-bin/www_bget?sot:102605024	-	Remorin, C-terminal
239	PGSC0003DMG400010356	34.3223	3.13396	3.4531	0.0031079	0.02367	UP	--	--	GO:0016021//GO:0044425//GO:0031224//GO:0016020//GO:0005575	integral component of membrane//membrane part//intrinsic component of membrane//membrane//cellular_component	--	--	no KO assigned | (RefSeq) uncharacterized LOC102603128	http://www.genome.jp/dbget-bin/www_bget?sot:102603128	-	Domain of unknown function DUF4220||Protein of unknown function DUF594
240	PGSC0003DMG400010369	161.22	1.44708	6.7997	1.7229e-06	5.0669e-05	UP	GO:0006812//GO:0055085//GO:0006811//GO:0051179//GO:0006810//GO:0051234//GO:0008150//GO:0030001//GO:0009987	cation transport//transmembrane transport//ion transport//localization//transport//establishment of localization//biological_process//metal ion transport//cellular process	GO:0044425//GO:0016021//GO:0031224//GO:0005575//GO:0016020	membrane part//integral component of membrane//intrinsic component of membrane//cellular_component//membrane	GO:0022890//GO:0015075//GO:0008324//GO:0046873//GO:0005215//GO:0003674//GO:0022857	inorganic cation transmembrane transporter activity//ion transmembrane transporter activity//cation transmembrane transporter activity//metal ion transmembrane transporter activity//transporter activity//molecular_function//transmembrane transporter activity	K14709 solute carrier family 39 (zinc transporter), member 1/2/3 | (RefSeq) fe(2+) transport protein 1-like	http://www.genome.jp/dbget-bin/www_bget?sot:102581599	-	Zinc/iron permease
241	PGSC0003DMG400010406	264.287	98.0644	1.4303	0.0002776	0.0035028	UP	--	--	GO:0031224//GO:0016021//GO:0044425//GO:0016020//GO:0005575	intrinsic component of membrane//integral component of membrane//membrane part//membrane//cellular_component	--	--	no KO assigned | (RefSeq) uncharacterized protein At5g65660-like	http://www.genome.jp/dbget-bin/www_bget?sot:102596976	--	--
242	PGSC0003DMG400010440	108.623	31.5916	1.7817	0.00098318	0.0096572	UP	--	--	GO:0016021//GO:0044425//GO:0031224//GO:0016020//GO:0005575	integral component of membrane//membrane part//intrinsic component of membrane//membrane//cellular_component	--	--	no KO assigned | (RefSeq) ankyrin repeat-containing protein At3g12360-like	http://www.genome.jp/dbget-bin/www_bget?sot:102597396	-	PGG domain||Ankyrin repeat-containing domain||Ankyrin repeat
243	PGSC0003DMG400010484	616.509	252.778	1.2863	2.478e-05	0.00048314	UP	GO:0008150//GO:0043412//GO:0006796//GO:0009987//GO:0006793//GO:0008152//GO:0044260//GO:0071704//GO:0044267//GO:0019538//GO:0036211//GO:0044238//GO:0006468//GO:0044237//GO:0006464//GO:0043170//GO:0016310	biological_process//macromolecule modification//phosphate-containing compound metabolic process//cellular process//phosphorus metabolic process//metabolic process//cellular macromolecule metabolic process//organic substance metabolic process//cellular protein metabolic process//protein metabolic process//protein modification process//primary metabolic process//protein phosphorylation//cellular me…	--	--	GO:0016740//GO:1901363//GO:0003824//GO:0030554//GO:0097159//GO:0032555//GO:0035639//GO:0032550//GO:0016301//GO:0005524//GO:0032553//GO:0036094//GO:0003674//GO:0043167//GO:0004672//GO:0016772//GO:0001882//GO:0000166//GO:0001883//GO:0016773//GO:0004674//GO:0005488//GO:0032549//GO:0032559//GO:0043168//GO:0017076//GO:0097367//GO:1901265	transferase activity//heterocyclic compound binding//catalytic activity//adenyl nucleotide binding//organic cyclic compound binding//purine ribonucleotide binding//purine ribonucleoside triphosphate binding//purine ribonucleoside binding//kinase activity//ATP binding//ribonucleotide binding//small molecule binding//molecular_function//ion binding//protein kinase activity//transferase activity, tr…	no KO assigned | (RefSeq) glycerophosphodiester phosphodiesterase protein kinase domain-containing GDPDL2-like	http://www.genome.jp/dbget-bin/www_bget?sot:102585361	-	Protein kinase-like domain||Serine-threonine/tyrosine-protein kinase, catalytic domain||Serine/threonine-protein kinase, active site||Protein kinase, ATP binding site||Protein kinase domain
244	PGSC0003DMG400010489	438.675	139.126	1.6568	1.1166e-06	3.4969e-05	UP	--	--	--	--	--	--	K04733 interleukin-1 receptor-associated kinase 4 [EC:2.7.11.1] | (RefSeq) probable receptor-like protein kinase At1g67000	http://www.genome.jp/dbget-bin/www_bget?sot:102586943	--	--
245	PGSC0003DMG400010501	238.768	58.097	2.0391	1.7767e-06	5.215e-05	UP	--	--	--	--	--	--	--	--	--	--
246	PGSC0003DMG400010504	802.881	350.735	1.1948	3.2936e-05	0.00060695	UP	GO:0019538//GO:0044238//GO:0006468//GO:0036211//GO:0044267//GO:0006464//GO:0016310//GO:0043170//GO:0044237//GO:0006796//GO:0009987//GO:0008150//GO:0043412//GO:0044260//GO:0071704//GO:0006793//GO:0008152	protein metabolic process//primary metabolic process//protein phosphorylation//protein modification process//cellular protein metabolic process//cellular protein modification process//phosphorylation//macromolecule metabolic process//cellular metabolic process//phosphate-containing compound metabolic process//cellular process//biological_process//macromolecule modification//cellular macromolecule…	--	--	GO:0016773//GO:0001882//GO:0016772//GO:0004672//GO:0001883//GO:0000166//GO:0017076//GO:1901265//GO:0097367//GO:0032549//GO:0032559//GO:0005488//GO:0043168//GO:0097159//GO:0016740//GO:0003824//GO:0030554//GO:1901363//GO:0003674//GO:0036094//GO:0043167//GO:0032550//GO:0035639//GO:0032555//GO:0032553//GO:0005524//GO:0016301	phosphotransferase activity, alcohol group as acceptor//nucleoside binding//transferase activity, transferring phosphorus-containing groups//protein kinase activity//purine nucleoside binding//nucleotide binding//purine nucleotide binding//nucleoside phosphate binding//carbohydrate derivative binding//ribonucleoside binding//adenyl ribonucleotide binding//binding//anion binding//organic cyclic co…	no KO assigned | (RefSeq) probable receptor-like protein kinase At1g67000	http://www.genome.jp/dbget-bin/www_bget?sot:102587279	-	Protein kinase domain||Protein kinase, ATP binding site||Protein kinase-like domain
247	PGSC0003DMG400010542	42.0157	6.12724	2.7776	0.0042007	0.02995	UP	--	--	--	--	--	--	no KO assigned | (RefSeq) protein LIGHT-DEPENDENT SHORT HYPOCOTYLS 10-like	http://www.genome.jp/dbget-bin/www_bget?sot:102600485	-	ALOG domain
248	PGSC0003DMG400010587	19197.7	8893.69	1.1101	0.00020393	0.0027217	UP	GO:0008152//GO:0008150	metabolic process//biological_process	--	--	GO:0005488//GO:0010333//GO:0016835//GO:0016838//GO:0046872//GO:0043169//GO:0000287//GO:0016829//GO:0003674//GO:0043167//GO:0003824	binding//terpene synthase activity//carbon-oxygen lyase activity//carbon-oxygen lyase activity, acting on phosphates//metal ion binding//cation binding//magnesium ion binding//lyase activity//molecular_function//ion binding//catalytic activity	K15803 (-)-germacrene D synthase [EC:4.2.3.22 4.2.3.75] | (RefSeq) (-)-germacrene D synthase-like	http://www.genome.jp/dbget-bin/www_bget?sot:102598796	-	Isoprenoid synthase domain||Terpene synthase, metal-binding domain||Terpenoid cyclases/protein prenyltransferase alpha-alpha toroid||Terpene synthase, N-terminal domain
249	PGSC0003DMG400010668	36.2377	2.16081	4.0678	0.0047888	0.03314	UP	GO:0034641//GO:0016070//GO:0065007//GO:0032774//GO:0010468//GO:0018130//GO:0050794//GO:0034654//GO:0060255//GO:0010556//GO:0010467//GO:0006807//GO:0009058//GO:0044238//GO:0046483//GO:0090304//GO:1901360//GO:0006139//GO:0044271//GO:0044237//GO:0019219//GO:0009059//GO:0043170//GO:0019222//GO:0009889//GO:0044249//GO:0031323//GO:0050789//GO:0006355//GO:0008150//GO:0031326//GO:2000112//GO:0019438//GO:…	cellular nitrogen compound metabolic process//RNA metabolic process//biological regulation//RNA biosynthetic process//regulation of gene expression//heterocycle biosynthetic process//regulation of cellular process//nucleobase-containing compound biosynthetic process//regulation of macromolecule metabolic process//regulation of macromolecule biosynthetic process//gene expression//nitrogen compound…	GO:0005623//GO:0005622//GO:0005634//GO:0044464//GO:0044424//GO:0043229//GO:0043226//GO:0005575//GO:0043231//GO:0043227	cell//intracellular//nucleus//cell part//intracellular part//intracellular organelle//organelle//cellular_component//intracellular membrane-bounded organelle//membrane-bounded organelle	GO:0003677//GO:0005488//GO:0003676//GO:1901363//GO:0097159//GO:0003674	DNA binding//binding//nucleic acid binding//heterocyclic compound binding//organic cyclic compound binding//molecular_function	no KO assigned | (RefSeq) B3 domain-containing protein At5g60140-like	http://www.genome.jp/dbget-bin/www_bget?sot:102599396	-	B3 DNA binding domain||DNA-binding pseudobarrel domain
250	PGSC0003DMG400010696	212.25	64.8462	1.7107	6.0197e-05	0.0010098	UP	--	--	--	--	--	--	K04733 interleukin-1 receptor-associated kinase 4 [EC:2.7.11.1] | (RefSeq) probable receptor-like protein kinase At1g67000	http://www.genome.jp/dbget-bin/www_bget?sot:102586943	-	Protein kinase-like domain
251	PGSC0003DMG400010701	351.403	97.4999	1.8497	5.4227e-07	1.8642e-05	UP	GO:0044267//GO:0006468//GO:0044238//GO:0036211//GO:0019538//GO:0044237//GO:0016310//GO:0043170//GO:0006464//GO:0043412//GO:0008150//GO:0009987//GO:0006796//GO:0008152//GO:0006793//GO:0071704//GO:0044260	cellular protein metabolic process//protein phosphorylation//primary metabolic process//protein modification process//protein metabolic process//cellular metabolic process//phosphorylation//macromolecule metabolic process//cellular protein modification process//macromolecule modification//biological_process//cellular process//phosphate-containing compound metabolic process//metabolic process//pho…	--	--	GO:0001883//GO:0000166//GO:0001882//GO:0016772//GO:0004672//GO:0030247//GO:0016773//GO:0043168//GO:0032559//GO:0032549//GO:0005488//GO:1901265//GO:0097367//GO:0017076//GO:0030554//GO:0003824//GO:1901363//GO:0016740//GO:0030246//GO:0097159//GO:0001871//GO:0032553//GO:0005524//GO:0016301//GO:0032550//GO:0035639//GO:0032555//GO:0043167//GO:0003674//GO:0036094	purine nucleoside binding//nucleotide binding//nucleoside binding//transferase activity, transferring phosphorus-containing groups//protein kinase activity//polysaccharide binding//phosphotransferase activity, alcohol group as acceptor//anion binding//adenyl ribonucleotide binding//ribonucleoside binding//binding//nucleoside phosphate binding//carbohydrate derivative binding//purine nucleotide bi…	K04733 interleukin-1 receptor-associated kinase 4 [EC:2.7.11.1] | (RefSeq) probable receptor-like protein kinase At1g67000	http://www.genome.jp/dbget-bin/www_bget?sot:102587903	-	Protein kinase-like domain||Serine/threonine-protein kinase, active site||Protein kinase domain||Wall-associated receptor kinase, galacturonan-binding domain||Protein kinase, ATP binding site
252	PGSC0003DMG400010738	390.195	174.47	1.1612	0.00075671	0.007807	UP	--	--	--	--	--	--	no KO assigned | (RefSeq) E3 ubiquitin-protein ligase RNF8-A-like	http://www.genome.jp/dbget-bin/www_bget?sot:102593857	-	Zinc finger, RING-type
253	PGSC0003DMG400010751	997.335	428.134	1.22	1.8161e-05	0.00037566	UP	--	--	--	--	--	--	K14550 U3 small nucleolar RNA-associated protein 10 | (RefSeq) uncharacterized protein At3g06530	http://www.genome.jp/dbget-bin/www_bget?sot:102587093	-	Armadillo-like helical||Armadillo-type fold
254	PGSC0003DMG400010866	26.4075	2.17062	3.6048	0.0049612	0.034041	UP	--	--	GO:0005575//GO:0016020//GO:0016021//GO:0044425//GO:0031224	cellular_component//membrane//integral component of membrane//membrane part//intrinsic component of membrane	--	--	no KO assigned | (RefSeq) lysine histidine transporter-like 8	http://www.genome.jp/dbget-bin/www_bget?sot:102585770	LHT7	Amino acid transporter, transmembrane domain
255	PGSC0003DMG400010949	61.7623	11.147	2.4701	0.0015881	0.014099	UP	--	--	--	--	--	--	no KO assigned | (RefSeq) putative receptor-like protein kinase At3g47110	http://www.genome.jp/dbget-bin/www_bget?sot:102589771	--	--
256	PGSC0003DMG400010973	1096.1	489.215	1.1638	0.00011366	0.0017065	UP	--	--	GO:0009536//GO:0043226//GO:0009507//GO:0005737//GO:0043227//GO:0043231//GO:0005575//GO:0044444//GO:0005623//GO:0044464//GO:0005622//GO:0044424//GO:0043229	plastid//organelle//chloroplast//cytoplasm//membrane-bounded organelle//intracellular membrane-bounded organelle//cellular_component//cytoplasmic part//cell//cell part//intracellular//intracellular part//intracellular organelle	--	--	K07253 phenylpyruvate tautomerase [EC:5.3.2.1] | (RefSeq) macrophage migration inhibitory factor homolog	http://www.genome.jp/dbget-bin/www_bget?sot:102582498	-	Macrophage migration inhibitory factor||Tautomerase/MIF superfamily
257	PGSC0003DMG400011018	589.103	62.7858	3.23	0.0075314	0.046336	UP	--	--	--	--	--	--	no KO assigned | (RefSeq) UPF0503 protein At3g09070, chloroplastic-like	http://www.genome.jp/dbget-bin/www_bget?sot:102583781	-	Uncharacterised protein family UPF0503
258	PGSC0003DMG400011087	1642.33	416.771	1.9784	2.8455e-06	7.7653e-05	UP	--	--	--	--	--	--	no KO assigned | (RefSeq) uncharacterized LOC102585649	http://www.genome.jp/dbget-bin/www_bget?sot:102585649	-	PAR1
259	PGSC0003DMG400011113	106.864	24.2977	2.1369	0.0002941	0.003662	UP	--	--	--	--	--	--	no KO assigned | (RefSeq) putative disease resistance protein RGA4	http://www.genome.jp/dbget-bin/www_bget?sot:102585486	-	Leucine-rich repeat domain, L domain-like
260	PGSC0003DMG400011190	20.9101	0.982831	4.4111	0.0075855	0.046558	UP	GO:0008150//GO:0050789//GO:0043086//GO:0048519//GO:0008152//GO:0050790//GO:0044092//GO:0065007//GO:0065009//GO:0009892//GO:0019222	biological_process//regulation of biological process//negative regulation of catalytic activity//negative regulation of biological process//metabolic process//regulation of catalytic activity//negative regulation of molecular function//biological regulation//regulation of molecular function//negative regulation of metabolic process//regulation of metabolic process	--	--	GO:0030234//GO:0003674//GO:0046910//GO:0098772//GO:0004857	enzyme regulator activity//molecular_function//pectinesterase inhibitor activity//molecular function regulator//enzyme inhibitor activity	--	--	-	Pectinesterase inhibitor domain||Pectinesterase inhibitor, plant
261	PGSC0003DMG400011214	226.156	102.666	1.1394	0.0058937	0.038637	UP	--	--	GO:0016021//GO:0044425//GO:0031224//GO:0016020//GO:0005575	integral component of membrane//membrane part//intrinsic component of membrane//membrane//cellular_component	--	--	--	--	--	--
262	PGSC0003DMG400011247	475.191	185.826	1.3546	4.0221e-05	0.00071394	UP	GO:0008150//GO:0051234//GO:0006810//GO:0098655//GO:0009987//GO:0034220//GO:0051179//GO:0006811//GO:0006812//GO:0055085	biological_process//establishment of localization//transport//cation transmembrane transport//cellular process//ion transmembrane transport//localization//ion transport//cation transport//transmembrane transport	GO:0016020//GO:0005575//GO:0031224//GO:0044425//GO:0016021	membrane//cellular_component//intrinsic component of membrane//membrane part//integral component of membrane	GO:0022857//GO:0003674//GO:0015075//GO:0008324//GO:0005215	transmembrane transporter activity//molecular_function//ion transmembrane transporter activity//cation transmembrane transporter activity//transporter activity	no KO assigned | (RefSeq) metal tolerance protein 9-like	http://www.genome.jp/dbget-bin/www_bget?sot:102589902	-	Cation efflux protein, cytoplasmic domain||Cation efflux protein
263	PGSC0003DMG400011337	987.461	393.578	1.3271	0.0027755	0.021736	UP	GO:0007165//GO:0050896//GO:0050794//GO:0065007//GO:0007154//GO:0051716//GO:0009987//GO:0023052//GO:0008150//GO:0050789	signal transduction//response to stimulus//regulation of cellular process//biological regulation//cell communication//cellular response to stimulus//cellular process//signaling//biological_process//regulation of biological process	--	--	--	--	no KO assigned | (RefSeq) putative E3 ubiquitin-protein ligase LIN	http://www.genome.jp/dbget-bin/www_bget?sot:102584479	-	WD40/YVTN repeat-like-containing domain||Armadillo-like helical||WD40 repeat, conserved site||WD40 repeat||Guanine nucleotide-binding protein, beta subunit||Armadillo-type fold||WD40-repeat-containing domain
264	PGSC0003DMG400011508	260.741	118.202	1.1414	0.002515	0.020161	UP	--	--	--	--	--	--	no KO assigned | (RefSeq) uncharacterized LOC102587531	http://www.genome.jp/dbget-bin/www_bget?sot:102587531	--	--
265	PGSC0003DMG400011708	216.762	75.2718	1.5259	0.0004266	0.0049359	UP	--	--	GO:0044425//GO:0016021//GO:0031224//GO:0016020//GO:0005575	membrane part//integral component of membrane//intrinsic component of membrane//membrane//cellular_component	--	--	no KO assigned | (RefSeq) receptor-like protein 12	http://www.genome.jp/dbget-bin/www_bget?sot:102585364	-	Leucine-rich repeat domain, L domain-like||Leucine-rich repeat
266	PGSC0003DMG400011719	21812.9	9172.68	1.2498	1.0528e-07	4.492e-06	UP	--	--	--	--	--	--	K13993 HSP20 family protein | (RefSeq) 18.1 kDa class I heat shock protein-like	http://www.genome.jp/dbget-bin/www_bget?sot:102601300	-	HSP20-like chaperone||Small heat shock protein HSP20||Alpha crystallin/Hsp20 domain
267	PGSC0003DMG400011724	43.0959	4.21927	3.3525	0.00098026	0.0096348	UP	--	--	--	--	--	--	no KO assigned | (RefSeq) uncharacterized LOC102582579	http://www.genome.jp/dbget-bin/www_bget?sot:102582579	--	--
268	PGSC0003DMG400011758	1303.86	635.756	1.0362	0.00012401	0.0018254	UP	--	--	--	--	--	--	no KO assigned | (RefSeq) uncharacterized LOC102590250	http://www.genome.jp/dbget-bin/www_bget?sot:102590250	-	Zinc finger, RING/FYVE/PHD-type
269	PGSC0003DMG400011824	192.72	57.4691	1.7457	0.00010894	0.0016497	UP	GO:0006793//GO:0008152//GO:0008150//GO:0006796//GO:0009987//GO:0044237//GO:0016311	phosphorus metabolic process//metabolic process//biological_process//phosphate-containing compound metabolic process//cellular process//cellular metabolic process//dephosphorylation	--	--	GO:0016787//GO:0008252//GO:0003674//GO:0016791//GO:0016788//GO:0003824//GO:0042578	hydrolase activity//nucleotidase activity//molecular_function//phosphatase activity//hydrolase activity, acting on ester bonds//catalytic activity//phosphoric ester hydrolase activity	K03787 5'-nucleotidase [EC:3.1.3.5] | (RefSeq) 5'-nucleotidase SurE-like	http://www.genome.jp/dbget-bin/www_bget?sot:102599953	-	Survival protein SurE-like phosphatase/nucleotidase||Survival protein SurE
270	PGSC0003DMG400011902	87.9884	4.07213	4.4335	2.3362e-06	6.5547e-05	UP	--	--	--	--	--	--	K06911 uncharacterized protein | (RefSeq) pirin-like protein	http://www.genome.jp/dbget-bin/www_bget?sot:102582065	-	RmlC-like jelly roll fold||Pirin, C-terminal domain||Pirin||RmlC-like cupin domain||Pirin, N-terminal domain
271	PGSC0003DMG400012067	273.964	106.412	1.3643	0.00038619	0.0045655	UP	--	--	GO:0005575//GO:0016020//GO:0031224//GO:0044425//GO:0016021	cellular_component//membrane//intrinsic component of membrane//membrane part//integral component of membrane	--	--	--	--	-	PGG domain||Ankyrin repeat-containing domain||Ankyrin repeat
272	PGSC0003DMG400012156	1084.13	374.182	1.5347	3.5951e-05	0.00065325	UP	GO:0008150//GO:0009987//GO:0008152//GO:0071704//GO:0005975//GO:0044238//GO:0071554//GO:0016043//GO:0045229//GO:0071840//GO:0071555	biological_process//cellular process//metabolic process//organic substance metabolic process//carbohydrate metabolic process//primary metabolic process//cell wall organization or biogenesis//cellular component organization//external encapsulating structure organization//cellular component organization or biogenesis//cell wall organization	GO:0005575//GO:0005576	cellular_component//extracellular region	GO:0003824//GO:0016829//GO:0004553//GO:0016787//GO:0003674//GO:0004650//GO:0016798	catalytic activity//lyase activity//hydrolase activity, hydrolyzing O-glycosyl compounds//hydrolase activity//molecular_function//polygalacturonase activity//hydrolase activity, acting on glycosyl bonds	no KO assigned | (RefSeq) probable polygalacturonase	http://www.genome.jp/dbget-bin/www_bget?sot:102591521	-	Parallel beta-helix repeat||Pectin lyase fold/virulence factor||Pectin lyase fold||Glycoside hydrolase, family 28
273	PGSC0003DMG400012191	277.625	96.1531	1.5297	0.00097871	0.0096227	UP	GO:0008150//GO:0008152	biological_process//metabolic process	--	--	GO:0003824//GO:0003674	catalytic activity//molecular_function	no KO assigned | (RefSeq) phosphoglycerate mutase-like protein AT74	http://www.genome.jp/dbget-bin/www_bget?sot:102588114	-	Histidine phosphatase superfamily, clade-1||Phosphoglycerate/bisphosphoglycerate mutase, active site||Histidine phosphatase superfamily
274	PGSC0003DMG400012225	3153.9	1224.78	1.3646	6.1726e-08	2.8446e-06	UP	GO:0008152//GO:0043604//GO:1901576//GO:0044260//GO:0034645//GO:0006518//GO:0071704//GO:1901564//GO:0008150//GO:0044249//GO:1901566//GO:0009987//GO:0043043//GO:0044271//GO:0044237//GO:0009059//GO:0043170//GO:0034641//GO:0044267//GO:0006807//GO:0019538//GO:0009058//GO:0010467//GO:0043603//GO:0006412//GO:0044238	metabolic process//amide biosynthetic process//organic substance biosynthetic process//cellular macromolecule metabolic process//cellular macromolecule biosynthetic process//peptide metabolic process//organic substance metabolic process//organonitrogen compound metabolic process//biological_process//cellular biosynthetic process//organonitrogen compound biosynthetic process//cellular process//pep…	GO:0005840//GO:0005737//GO:0005575//GO:0032991//GO:0043226//GO:0043232//GO:0044424//GO:0043229//GO:0043228//GO:0044444//GO:0005623//GO:0005622//GO:0044464	ribosome//cytoplasm//cellular_component//protein-containing complex//organelle//intracellular non-membrane-bounded organelle//intracellular part//intracellular organelle//non-membrane-bounded organelle//cytoplasmic part//cell//intracellular//cell part	GO:0003674//GO:0003735//GO:0005198	molecular_function//structural constituent of ribosome//structural molecule activity	K02867 large subunit ribosomal protein L11 | (RefSeq) 50S ribosomal protein L11	http://www.genome.jp/dbget-bin/www_bget?sot:102582361	-	Ribosomal protein L11, bacterial-type||Ribosomal protein L11, conserved site||Ribosomal protein L11/L12||Ribosomal protein L11, N-terminal||Ribosomal protein L11, C-terminal
275	PGSC0003DMG400012265	1017.46	488.948	1.0572	0.00029456	0.0036662	UP	--	--	--	--	--	--	no KO assigned | (RefSeq) uncharacterized LOC102578852	http://www.genome.jp/dbget-bin/www_bget?sot:102578852	--	--
276	PGSC0003DMG400012280	489.562	211.62	1.21	0.0002013	0.0026966	UP	--	--	--	--	--	--	--	--	--	--
277	PGSC0003DMG400012315	295.389	50.7069	2.5424	1.266e-08	7.1445e-07	UP	--	--	GO:0031224//GO:0016021//GO:0044425//GO:0016020//GO:0005575	intrinsic component of membrane//integral component of membrane//membrane part//membrane//cellular_component	--	--	--	--	-	Immunoglobulin-like fold
278	PGSC0003DMG400012466	629.387	210.118	1.5827	0.0023191	0.018994	UP	GO:0006950//GO:0006952//GO:0050896//GO:0008150	response to stress//defense response//response to stimulus//biological_process	--	--	GO:0043168//GO:0032549//GO:0032559//GO:0005488//GO:1901265//GO:0097367//GO:0017076//GO:0001883//GO:0000166//GO:0001882//GO:0032553//GO:0032550//GO:0032555//GO:0043531//GO:0043167//GO:0036094//GO:0003674//GO:0030554//GO:1901363//GO:0097159	anion binding//ribonucleoside binding//adenyl ribonucleotide binding//binding//nucleoside phosphate binding//carbohydrate derivative binding//purine nucleotide binding//purine nucleoside binding//nucleotide binding//nucleoside binding//ribonucleotide binding//purine ribonucleoside binding//purine ribonucleotide binding//ADP binding//ion binding//small molecule binding//molecular_function//adenyl …	K13459 disease resistance protein RPS2 | (RefSeq) disease resistance protein At4g27190-like	http://www.genome.jp/dbget-bin/www_bget?sot:102589378	-	Winged helix-turn-helix DNA-binding domain||P-loop containing nucleoside triphosphate hydrolase||NB-ARC||Leucine-rich repeat domain, L domain-like
279	PGSC0003DMG400012573	97.8884	21.1473	2.2107	0.00038684	0.0045695	UP	--	--	--	--	--	--	no KO assigned | (RefSeq) LMBR1 domain-containing protein 2 homolog A-like	http://www.genome.jp/dbget-bin/www_bget?sot:102601612	--	--
280	PGSC0003DMG400012591	2066.24	827.562	1.3201	4.7634e-07	1.6722e-05	UP	GO:0043170//GO:0006464//GO:0044237//GO:0036211//GO:0044238//GO:0019538//GO:0006091//GO:0044267//GO:0019684//GO:0018298//GO:0071704//GO:0009765//GO:0044260//GO:0015979//GO:0008152//GO:0009987//GO:0043412//GO:0008150	macromolecule metabolic process//cellular protein modification process//cellular metabolic process//protein modification process//primary metabolic process//protein metabolic process//generation of precursor metabolites and energy//cellular protein metabolic process//photosynthesis, light reaction//protein-chromophore linkage//organic substance metabolic process//photosynthesis, light harvesting/…	GO:0009535//GO:0044435//GO:0044446//GO:0043229//GO:0016021//GO:0044422//GO:0044425//GO:0044424//GO:0055035//GO:0042651//GO:0031224//GO:0044464//GO:0005622//GO:0009534//GO:0044444//GO:0005623//GO:0009521//GO:0044434//GO:0009523//GO:0009522//GO:0016020//GO:0043227//GO:0031984//GO:0032991//GO:0043231//GO:0005575//GO:0009507//GO:0005737//GO:0043226//GO:0034357//GO:0009579//GO:0044436//GO:0009536//GO:…	chloroplast thylakoid membrane//plastid part//intracellular organelle part//intracellular organelle//integral component of membrane//organelle part//membrane part//intracellular part//plastid thylakoid membrane//thylakoid membrane//intrinsic component of membrane//cell part//intracellular//chloroplast thylakoid//cytoplasmic part//cell//photosystem//chloroplast part//photosystem II//photosystem I/…	GO:0005488//GO:0003674//GO:0016168//GO:0046906//GO:0097159//GO:1901363	binding//molecular_function//chlorophyll binding//tetrapyrrole binding//organic cyclic compound binding//heterocyclic compound binding	K08917 light-harvesting complex II chlorophyll a/b binding protein 6 | (RefSeq) chlorophyll a-b binding protein CP24 10A, chloroplastic	http://www.genome.jp/dbget-bin/www_bget?sot:102586836	-	Chlorophyll a/b binding protein domain||Chlorophyll A-B binding protein||Chlorophyll A-B binding protein, plant
281	PGSC0003DMG400012607	406.229	198.332	1.0344	0.0019244	0.016384	UP	GO:0090304//GO:0044238//GO:0046483//GO:0006807//GO:0009058//GO:0010467//GO:0034654//GO:0010556//GO:0060255//GO:0018130//GO:0050794//GO:0065007//GO:0010468//GO:0032774//GO:0034641//GO:0016070//GO:0019222//GO:0043170//GO:0019219//GO:0009059//GO:0044237//GO:0006139//GO:1901360//GO:0044271//GO:0080090//GO:1901362//GO:0009987//GO:0051171//GO:0019438//GO:0006355//GO:0031326//GO:0008150//GO:2000112//GO:…	nucleic acid metabolic process//primary metabolic process//heterocycle metabolic process//nitrogen compound metabolic process//biosynthetic process//gene expression//nucleobase-containing compound biosynthetic process//regulation of macromolecule biosynthetic process//regulation of macromolecule metabolic process//heterocycle biosynthetic process//regulation of cellular process//biological regula…	GO:0044464//GO:0005622//GO:0005634//GO:0005623//GO:0043229//GO:0044424//GO:0043226//GO:0043227//GO:0005575//GO:0043231	cell part//intracellular//nucleus//cell//intracellular organelle//intracellular part//organelle//membrane-bounded organelle//cellular_component//intracellular membrane-bounded organelle	GO:0003677//GO:0005488//GO:0097159//GO:0003676//GO:1901363//GO:0003674	DNA binding//binding//organic cyclic compound binding//nucleic acid binding//heterocyclic compound binding//molecular_function	no KO assigned | (RefSeq) NAC domain-containing protein 8	http://www.genome.jp/dbget-bin/www_bget?sot:102582119	-	NAC domain
282	PGSC0003DMG400012615	570.171	277.797	1.0374	0.0064036	0.041047	UP	GO:0008152//GO:0008150//GO:0032259	metabolic process//biological_process//methylation	--	--	GO:0008168//GO:0003674//GO:0016741//GO:0016740//GO:0003824	methyltransferase activity//molecular_function//transferase activity, transferring one-carbon groups//transferase activity//catalytic activity	no KO assigned | (RefSeq) uncharacterized LOC102583120	http://www.genome.jp/dbget-bin/www_bget?sot:102583120	-	Methyltransferase type 11||S-adenosyl-L-methionine-dependent methyltransferase
283	PGSC0003DMG400012625	184.277	58.2146	1.6624	0.00030283	0.003749	UP	--	--	GO:0044425//GO:0016021//GO:0031224//GO:0016020//GO:0005575	membrane part//integral component of membrane//intrinsic component of membrane//membrane//cellular_component	--	--	K12386 cystinosin | (RefSeq) cystinosin homolog	http://www.genome.jp/dbget-bin/www_bget?sot:102589926	-	PQ-loop repeat||Lysosomal cystine transporter
284	PGSC0003DMG400012669	182.612	29.583	2.6259	1.565e-07	6.4122e-06	UP	GO:0008152//GO:0008150//GO:0055114	metabolic process//biological_process//oxidation-reduction process	--	--	GO:0005506//GO:0046906//GO:0003674//GO:0043167//GO:0016491//GO:1901363//GO:0003824//GO:0097159//GO:0005488//GO:0046872//GO:0016705//GO:0020037//GO:0046914//GO:0043169	iron ion binding//tetrapyrrole binding//molecular_function//ion binding//oxidoreductase activity//heterocyclic compound binding//catalytic activity//organic cyclic compound binding//binding//metal ion binding//oxidoreductase activity, acting on paired donors, with incorporation or reduction of molecular oxygen//heme binding//transition metal ion binding//cation binding	K10717 cytokinin trans-hydroxylase | (RefSeq) cytokinin hydroxylase-like	http://www.genome.jp/dbget-bin/www_bget?sot:102603015	-	Cytochrome P450, E-class, group I||Cytochrome P450
285	PGSC0003DMG400012718	51.5287	6.91827	2.8969	0.00082247	0.008358	UP	GO:0006807//GO:0046483//GO:0065007//GO:0034754//GO:0010817//GO:0042445//GO:0044237//GO:0055114//GO:0009987//GO:0008150//GO:1901564//GO:0009308//GO:0065008//GO:0009690//GO:0006725//GO:0071704//GO:0008152	nitrogen compound metabolic process//heterocycle metabolic process//biological regulation//cellular hormone metabolic process//regulation of hormone levels//hormone metabolic process//cellular metabolic process//oxidation-reduction process//cellular process//biological_process//organonitrogen compound metabolic process//amine metabolic process//regulation of biological quality//cytokinin metaboli…	--	--	GO:0000166//GO:0048037//GO:0016614//GO:1901265//GO:0005488//GO:0043168//GO:0097159//GO:0050660//GO:0050662//GO:0019139//GO:0016491//GO:0003824//GO:0016645//GO:1901363//GO:0003674//GO:0036094//GO:0043167	nucleotide binding//cofactor binding//oxidoreductase activity, acting on CH-OH group of donors//nucleoside phosphate binding//binding//anion binding//organic cyclic compound binding//flavin adenine dinucleotide binding//coenzyme binding//cytokinin dehydrogenase activity//oxidoreductase activity//catalytic activity//oxidoreductase activity, acting on the CH-NH group of donors//heterocyclic compoun…	K00279 cytokinin dehydrogenase [EC:1.5.99.12] | (RefSeq) cytokinin oxidase/dehydrogenase 1	http://www.genome.jp/dbget-bin/www_bget?sot:102577758	-	FAD linked oxidase, N-terminal||FAD-linked oxidase-like, C-terminal||CO dehydrogenase flavoprotein-like, FAD-binding, subdomain 2||FAD-binding, type 2||Cytokinin dehydrogenase 1, FAD/cytokinin binding domain||FAD-binding, type 2, subdomain 1||Vanillyl-alcohol oxidase/Cytokinin dehydrogenase C-terminal domain||Oxygen oxidoreductase covalent FAD-binding site
286	PGSC0003DMG400012795	932.947	308.018	1.5988	0.00011345	0.001705	UP	GO:0008150//GO:0055114//GO:0008152	biological_process//oxidation-reduction process//metabolic process	--	--	GO:0016705//GO:0020037//GO:0046914//GO:0043169//GO:0004497//GO:0005488//GO:0046872//GO:0016491//GO:0003824//GO:1901363//GO:0097159//GO:0005506//GO:0046906//GO:0003674//GO:0043167	oxidoreductase activity, acting on paired donors, with incorporation or reduction of molecular oxygen//heme binding//transition metal ion binding//cation binding//monooxygenase activity//binding//metal ion binding//oxidoreductase activity//catalytic activity//heterocyclic compound binding//organic cyclic compound binding//iron ion binding//tetrapyrrole binding//molecular_function//ion binding	K20562 biphenyl-4-hydroxylase | (RefSeq) cytochrome P450 CYP736A12-like	http://www.genome.jp/dbget-bin/www_bget?sot:102583882	-	Cytochrome P450, E-class, group I||Cytochrome P450||Cytochrome P450, conserved site
287	PGSC0003DMG400012879	60.3619	13.807	2.1282	0.0058552	0.03848	UP	--	--	--	--	--	--	K04120 ent-copalyl diphosphate synthase [EC:5.5.1.13] | (RefSeq) ent-copalyl diphosphate synthase, chloroplastic-like	http://www.genome.jp/dbget-bin/www_bget?sot:102596242	--	--
288	PGSC0003DMG400012894	1972.31	947.418	1.0578	0.00012617	0.0018472	UP	--	--	--	--	--	--	--	--	--	--
289	PGSC0003DMG400013010	97.0317	0.310531	8.2876	0.00052911	0.0058612	UP	--	--	GO:0005576//GO:0005575	extracellular region//cellular_component	GO:0043169//GO:0046914//GO:0030145//GO:0005488//GO:0046872//GO:0045735//GO:0043167//GO:0003674	cation binding//transition metal ion binding//manganese ion binding//binding//metal ion binding//nutrient reservoir activity//ion binding//molecular_function	no KO assigned | (RefSeq) auxin-binding protein ABP19a-like	http://www.genome.jp/dbget-bin/www_bget?sot:102602789	-	Germin, manganese binding site||Cupin 1||RmlC-like cupin domain||Germin||RmlC-like jelly roll fold
290	PGSC0003DMG400013037	896.97	355.386	1.3357	0.00013955	0.0020067	UP	--	--	--	--	--	--	no KO assigned | (RefSeq) uncharacterized LOC102588062	http://www.genome.jp/dbget-bin/www_bget?sot:102588062	--	--
291	PGSC0003DMG400013101	162.212	48.9445	1.7287	0.00041527	0.0048423	UP	--	--	--	--	--	--	K08233 polyneuridine-aldehyde esterase [EC:3.1.1.78] | (RefSeq) salicylic acid-binding protein 2-like	http://www.genome.jp/dbget-bin/www_bget?sot:102583962	-	Alpha/beta hydrolase fold-1||Alpha/Beta hydrolase fold
292	PGSC0003DMG400013130	87.2393	24.813	1.8139	0.0041918	0.029894	UP	--	--	--	--	--	--	no KO assigned | (RefSeq) protein FAF-like, chloroplastic	http://www.genome.jp/dbget-bin/www_bget?sot:102581020	-	The fantastic four family
293	PGSC0003DMG400013285	3192.26	1223.85	1.3831	0.0015486	0.013835	UP	GO:0046486//GO:1901617//GO:1901615//GO:0006629//GO:0034637//GO:0019751//GO:0044282//GO:0044238//GO:0009058//GO:0030258//GO:1901575//GO:0016311//GO:0046488//GO:0046164//GO:0044237//GO:0046838//GO:0016310//GO:0044255//GO:0046173//GO:0046165//GO:0006644//GO:0044283//GO:0016051//GO:0008150//GO:0044249//GO:0044281//GO:0046854//GO:0046434//GO:0009987//GO:0009056//GO:0019637//GO:0006796//GO:0043647//GO:…	glycerolipid metabolic process//organic hydroxy compound biosynthetic process//organic hydroxy compound metabolic process//lipid metabolic process//cellular carbohydrate biosynthetic process//polyol metabolic process//small molecule catabolic process//primary metabolic process//biosynthetic process//lipid modification//organic substance catabolic process//dephosphorylation//phosphatidylinositol m…	--	--	GO:0052833//GO:0042578//GO:0043169//GO:0052834//GO:0052832//GO:0005488//GO:0046872//GO:0003824//GO:0016788//GO:0008934//GO:0052745//GO:0016787//GO:0043167//GO:0003674//GO:0016791	inositol monophosphate 4-phosphatase activity//phosphoric ester hydrolase activity//cation binding//inositol monophosphate phosphatase activity//inositol monophosphate 3-phosphatase activity//binding//metal ion binding//catalytic activity//hydrolase activity, acting on ester bonds//inositol monophosphate 1-phosphatase activity//inositol phosphate phosphatase activity//hydrolase activity//ion bind…	K10047 inositol-phosphate phosphatase / L-galactose 1-phosphate phosphatase [EC:3.1.3.25 3.1.3.93] | (RefSeq) inositol monophosphatase 3	http://www.genome.jp/dbget-bin/www_bget?sot:102594242	-	Inositol monophosphatase, Lithium-sensitive||Inositol monophosphatase, conserved site||Inositol monophosphatase||Inositol monophosphatase, metal-binding site||Inositol monophosphatase-like
294	PGSC0003DMG400013337	201.799	91.6326	1.139	0.0074251	0.045857	UP	--	--	GO:0016020//GO:0005575//GO:0031224//GO:0044425//GO:0016021	membrane//cellular_component//intrinsic component of membrane//membrane part//integral component of membrane	--	--	no KO assigned | (RefSeq) uncharacterized membrane protein At1g16860	http://www.genome.jp/dbget-bin/www_bget?sot:102603744	--	--
295	PGSC0003DMG400013338	1659.89	701.134	1.2433	2.7132e-06	7.4518e-05	UP	--	--	--	--	--	--	no KO assigned | (RefSeq) uncharacterized LOC102603076	http://www.genome.jp/dbget-bin/www_bget?sot:102603076	--	--
296	PGSC0003DMG400013352	26.4999	1.33815	4.3077	0.0025393	0.020329	UP	GO:0008152//GO:0055114//GO:0008150	metabolic process//oxidation-reduction process//biological_process	GO:0016021//GO:0044425//GO:0031224//GO:0016020//GO:0005575	integral component of membrane//membrane part//intrinsic component of membrane//membrane//cellular_component	--	--	no KO assigned | (RefSeq) cytochrome b561 and DOMON domain-containing protein At5g47530	http://www.genome.jp/dbget-bin/www_bget?sot:102593912	-	Cytochrome b561/ferric reductase transmembrane||Cytochrome b561 and DOMON domain-containing protein||DOMON domain
297	PGSC0003DMG400013367	433.844	135.525	1.6786	1.0937e-06	3.429e-05	UP	--	--	--	--	--	--	--	--	--	--
298	PGSC0003DMG400013399	1477.56	211.831	2.8022	0.0075421	0.046377	UP	--	--	GO:0031224//GO:0016021//GO:0044425//GO:0016020//GO:0005575	intrinsic component of membrane//integral component of membrane//membrane part//membrane//cellular_component	--	--	no KO assigned | (RefSeq) uncharacterized LOC102599623	http://www.genome.jp/dbget-bin/www_bget?sot:102599623	-	HR-like lesion-inducer
299	PGSC0003DMG400013416	41.2892	4.37931	3.237	0.0019666	0.016686	UP	GO:0019684//GO:0018298//GO:0006091//GO:0044267//GO:0019538//GO:0036211//GO:0044238//GO:0044237//GO:0006464//GO:0043170//GO:0008150//GO:0043412//GO:0009987//GO:0015979//GO:0008152//GO:0009765//GO:0044260//GO:0071704	photosynthesis, light reaction//protein-chromophore linkage//generation of precursor metabolites and energy//cellular protein metabolic process//protein metabolic process//protein modification process//primary metabolic process//cellular metabolic process//cellular protein modification process//macromolecule metabolic process//biological_process//macromolecule modification//cellular process//phot…	GO:0044434//GO:0009523//GO:0009522//GO:0009534//GO:0044444//GO:0005623//GO:0009521//GO:0005622//GO:0031224//GO:0044464//GO:0042651//GO:0044425//GO:0055035//GO:0044424//GO:0044446//GO:0043229//GO:0016021//GO:0044422//GO:0009535//GO:0044435//GO:0031976//GO:0098796//GO:0044436//GO:0009536//GO:0034357//GO:0009579//GO:0043226//GO:0009507//GO:0005737//GO:0043231//GO:0005575//GO:0016020//GO:0043227//GO:…	chloroplast part//photosystem II//photosystem I//chloroplast thylakoid//cytoplasmic part//cell//photosystem//intracellular//intrinsic component of membrane//cell part//thylakoid membrane//membrane part//plastid thylakoid membrane//intracellular part//intracellular organelle part//intracellular organelle//integral component of membrane//organelle part//chloroplast thylakoid membrane//plastid part/…	GO:0005488//GO:1901363//GO:0097159//GO:0046906//GO:0003674//GO:0016168	binding//heterocyclic compound binding//organic cyclic compound binding//tetrapyrrole binding//molecular_function//chlorophyll binding	K08912 light-harvesting complex II chlorophyll a/b binding protein 1 | (RefSeq) chlorophyll a-b binding protein 3C, chloroplastic-like	http://www.genome.jp/dbget-bin/www_bget?sot:102604990	-	Chlorophyll A-B binding protein||Chlorophyll a/b binding protein domain||Chlorophyll A-B binding protein, plant
300	PGSC0003DMG400013433	310.138	127.635	1.2809	0.0020491	0.017215	UP	--	--	--	--	--	--	no KO assigned | (RefSeq) uncharacterized LOC102591035	http://www.genome.jp/dbget-bin/www_bget?sot:102591035	-	HSP20-like chaperone
301	PGSC0003DMG400013474	177.659	29.528	2.589	0.0055907	0.037117	UP	--	--	GO:0005575//GO:0016020//GO:0016021//GO:0044425//GO:0031224	cellular_component//membrane//integral component of membrane//membrane part//intrinsic component of membrane	--	--	no KO assigned | (RefSeq) uncharacterized LOC102591376	http://www.genome.jp/dbget-bin/www_bget?sot:102591376	--	--
302	PGSC0003DMG400013489	930.293	423.853	1.1341	0.0050372	0.034389	UP	GO:0009987//GO:0006796//GO:0043412//GO:0008150//GO:0071704//GO:0044260//GO:0008152//GO:0006793//GO:0036211//GO:0044238//GO:0006468//GO:0019538//GO:0044267//GO:0043170//GO:0016310//GO:0006464//GO:0044237	cellular process//phosphate-containing compound metabolic process//macromolecule modification//biological_process//organic substance metabolic process//cellular macromolecule metabolic process//metabolic process//phosphorus metabolic process//protein modification process//primary metabolic process//protein phosphorylation//protein metabolic process//cellular protein metabolic process//macromolecu…	GO:0016020//GO:0005575//GO:0031224//GO:0016021//GO:0044425	membrane//cellular_component//intrinsic component of membrane//integral component of membrane//membrane part	GO:0097159//GO:1901363//GO:0003824//GO:0030554//GO:0016740//GO:0043167//GO:0036094//GO:0003674//GO:0016301//GO:0005524//GO:0032553//GO:0032555//GO:0035639//GO:0032550//GO:0004674//GO:0016773//GO:0000166//GO:0001883//GO:0004672//GO:0016772//GO:0001882//GO:0097367//GO:1901265//GO:0017076//GO:0043168//GO:0005488//GO:0032549//GO:0032559	organic cyclic compound binding//heterocyclic compound binding//catalytic activity//adenyl nucleotide binding//transferase activity//ion binding//small molecule binding//molecular_function//kinase activity//ATP binding//ribonucleotide binding//purine ribonucleotide binding//purine ribonucleoside triphosphate binding//purine ribonucleoside binding//protein serine/threonine kinase activity//phospho…	no KO assigned | (RefSeq) protein NSP-INTERACTING KINASE 3-like	http://www.genome.jp/dbget-bin/www_bget?sot:102584311	-	Protein kinase-like domain||Leucine-rich repeat domain, L domain-like||Serine/threonine-protein kinase, active site||Leucine-rich repeat-containing N-terminal, plant-type||Protein kinase, ATP binding site||Leucine-rich repeat||Protein kinase domain
303	PGSC0003DMG400013548	240.06	83.9611	1.5156	0.0080965	0.048813	UP	--	--	GO:0005575//GO:0016020//GO:0031224//GO:0016021//GO:0044425	cellular_component//membrane//intrinsic component of membrane//integral component of membrane//membrane part	--	--	K06890 uncharacterized protein | (RefSeq) BI1-like protein	http://www.genome.jp/dbget-bin/www_bget?sot:102597327	-	Bax inhibitor 1-related
304	PGSC0003DMG400013587	54.7182	3.09898	4.1422	0.0013236	0.01223	UP	GO:1901362//GO:0080090//GO:0051171//GO:0009987//GO:0032502//GO:0019438//GO:2000112//GO:0006355//GO:0031326//GO:0008150//GO:0031323//GO:0044249//GO:0050789//GO:0009889//GO:0006725//GO:0006351//GO:0034645//GO:0071704//GO:0097659//GO:2001141//GO:1901576//GO:0044260//GO:0008152//GO:0051252//GO:1903506//GO:0090304//GO:0007275//GO:0046483//GO:0044238//GO:0009058//GO:0006807//GO:0010467//GO:0034654//GO:…	organic cyclic compound biosynthetic process//regulation of primary metabolic process//regulation of nitrogen compound metabolic process//cellular process//developmental process//aromatic compound biosynthetic process//regulation of cellular macromolecule biosynthetic process//regulation of transcription, DNA-templated//regulation of cellular biosynthetic process//biological_process//regulation o…	GO:0043226//GO:0043227//GO:0043231//GO:0005575//GO:0044464//GO:0005634//GO:0005622//GO:0005623//GO:0043229//GO:0044424	organelle//membrane-bounded organelle//intracellular membrane-bounded organelle//cellular_component//cell part//nucleus//intracellular//cell//intracellular organelle//intracellular part	GO:0097159//GO:1901363//GO:0003676//GO:0003700//GO:0003674//GO:0003677//GO:0005488	organic cyclic compound binding//heterocyclic compound binding//nucleic acid binding//DNA-binding transcription factor activity//molecular_function//DNA binding//binding	K09285 AP2-like factor, ANT lineage | (RefSeq) AP2-like ethylene-responsive transcription factor AIL1	http://www.genome.jp/dbget-bin/www_bget?sot:102587301	-	AP2-like ethylene-responsive transcription factor||DNA-binding domain||AP2/ERF domain
305	PGSC0003DMG400013648	213.767	89.6057	1.2544	0.002272	0.018699	UP	GO:0009987//GO:0008150//GO:0051234//GO:0006810//GO:0051179//GO:0055085	cellular process//biological_process//establishment of localization//transport//localization//transmembrane transport	GO:0005575//GO:0016020//GO:0031224//GO:0016021//GO:0044425	cellular_component//membrane//intrinsic component of membrane//integral component of membrane//membrane part	GO:0022857//GO:0003674//GO:0005215	transmembrane transporter activity//molecular_function//transporter activity	no KO assigned | (RefSeq) monosaccharide-sensing protein 2-like	http://www.genome.jp/dbget-bin/www_bget?sot:102599888	-	Sugar/inositol transporter||Major facilitator, sugar transporter-like||Major facilitator superfamily domain||Sugar transporter, conserved site
306	PGSC0003DMG400013702	43.2254	7.22868	2.5801	0.0052495	0.035498	UP	GO:1901576//GO:0009226//GO:0055086//GO:0071704//GO:0009117//GO:0006725//GO:0006793//GO:1901137//GO:0019673//GO:0008152//GO:0006796//GO:0019637//GO:0009987//GO:1901362//GO:0044281//GO:0044249//GO:0009298//GO:0008150//GO:0019438//GO:0006139//GO:1901360//GO:0044271//GO:0006753//GO:0044237//GO:0006807//GO:0009058//GO:0046483//GO:0044238//GO:0009225//GO:1901293//GO:0034641//GO:0090407//GO:0009165//GO:…	organic substance biosynthetic process//nucleotide-sugar biosynthetic process//nucleobase-containing small molecule metabolic process//organic substance metabolic process//nucleotide metabolic process//cellular aromatic compound metabolic process//phosphorus metabolic process//carbohydrate derivative biosynthetic process//GDP-mannose metabolic process//metabolic process//phosphate-containing comp…	GO:0005575//GO:0005737//GO:0044424//GO:0005622//GO:0044464//GO:0005623	cellular_component//cytoplasm//intracellular part//intracellular//cell part//cell	GO:0003674//GO:0016853//GO:0004615//GO:0003824//GO:0016866//GO:0016868	molecular_function//isomerase activity//phosphomannomutase activity//catalytic activity//intramolecular transferase activity//intramolecular transferase activity, phosphotransferases	K17497 phosphomannomutase [EC:5.4.2.8] | (RefSeq) phosphomannomutase-like	http://www.genome.jp/dbget-bin/www_bget?sot:102595382	-	HAD-like domain||HAD-superfamily hydrolase, subfamily IIB||Phosphomannomutase
307	PGSC0003DMG400013884	179.384	52.1466	1.7824	9.7971e-05	0.0015166	UP	GO:0008152//GO:0006793//GO:0071704//GO:0044260//GO:0043412//GO:0008150//GO:0009987//GO:0006796//GO:0044237//GO:0043170//GO:0016310//GO:0006464//GO:0044267//GO:0006468//GO:0044238//GO:0036211//GO:0019538	metabolic process//phosphorus metabolic process//organic substance metabolic process//cellular macromolecule metabolic process//macromolecule modification//biological_process//cellular process//phosphate-containing compound metabolic process//cellular metabolic process//macromolecule metabolic process//phosphorylation//cellular protein modification process//cellular protein metabolic process//pro…	--	--	GO:0016301//GO:0032553//GO:0005524//GO:0035639//GO:0032555//GO:0032550//GO:0043167//GO:0003674//GO:0036094//GO:1901363//GO:0030554//GO:0003824//GO:0016740//GO:0097159//GO:0043168//GO:0005488//GO:0032559//GO:0032549//GO:0097367//GO:1901265//GO:0017076//GO:0000166//GO:0001883//GO:0004672//GO:0001882//GO:0016772//GO:0004674//GO:0016773	kinase activity//ribonucleotide binding//ATP binding//purine ribonucleoside triphosphate binding//purine ribonucleotide binding//purine ribonucleoside binding//ion binding//molecular_function//small molecule binding//heterocyclic compound binding//adenyl nucleotide binding//catalytic activity//transferase activity//organic cyclic compound binding//anion binding//binding//adenyl ribonucleotide bin…	K04733 interleukin-1 receptor-associated kinase 4 [EC:2.7.11.1] | (RefSeq) glycerophosphodiester phosphodiesterase protein kinase domain-containing GDPDL2-like	http://www.genome.jp/dbget-bin/www_bget?sot:102605410	-	Protein kinase, ATP binding site||Protein kinase domain||Serine/threonine-protein kinase, active site||Protein kinase-like domain
308	PGSC0003DMG400013888	57.5681	12.1173	2.2482	0.0031424	0.023879	UP	--	--	--	--	GO:0003674//GO:0043167//GO:0005509//GO:0046872//GO:0005488//GO:0043169	molecular_function//ion binding//calcium ion binding//metal ion binding//binding//cation binding	no KO assigned | (RefSeq) calcium-binding protein PBP1-like	http://www.genome.jp/dbget-bin/www_bget?sot:102586681	-	EF-Hand 1, calcium-binding site||EF-hand domain||EF-hand domain pair
309	PGSC0003DMG400013942	45.2475	6.38976	2.824	0.0026398	0.020915	UP	--	--	--	--	--	--	K17275 plastin-1 | (RefSeq) fimbrin-2-like	http://www.genome.jp/dbget-bin/www_bget?sot:102594188	-	Calponin homology domain
310	PGSC0003DMG400013995	911.67	283.122	1.6871	0.0017635	0.015328	UP	GO:0043170//GO:0019538//GO:0044238//GO:0006508//GO:0008152//GO:0071704//GO:0008150	macromolecule metabolic process//protein metabolic process//primary metabolic process//proteolysis//metabolic process//organic substance metabolic process//biological_process	--	--	GO:0008233//GO:0008238//GO:0070008//GO:0016787//GO:0003674//GO:0004185//GO:0008236//GO:0017171//GO:0003824//GO:0070011//GO:0004180	peptidase activity//exopeptidase activity//serine-type exopeptidase activity//hydrolase activity//molecular_function//serine-type carboxypeptidase activity//serine-type peptidase activity//serine hydrolase activity//catalytic activity//peptidase activity, acting on L-amino acid peptides//carboxypeptidase activity	K16298 serine carboxypeptidase-like clade IV [EC:3.4.16.-] | (RefSeq) serine carboxypeptidase-like	http://www.genome.jp/dbget-bin/www_bget?sot:102591865	-	Alpha/Beta hydrolase fold||Serine carboxypeptidases, histidine active site||Serine carboxypeptidase, serine active site||Peptidase S10, serine carboxypeptidase
311	PGSC0003DMG400014028	100.194	6.78663	3.884	0.0034769	0.025881	UP	--	--	GO:0005575//GO:0016020//GO:0031224//GO:0016021//GO:0044425	cellular_component//membrane//intrinsic component of membrane//integral component of membrane//membrane part	--	--	--	--	--	--
312	PGSC0003DMG400014093	302.592	104.445	1.5346	9.3148e-05	0.0014571	UP	GO:0051552//GO:1901615//GO:1901617//GO:0009058//GO:0009813//GO:0009812//GO:0051555//GO:0008150//GO:0051554//GO:0046148//GO:0055114//GO:0051553//GO:0042440//GO:0008152//GO:1901576//GO:0071704	flavone metabolic process//organic hydroxy compound metabolic process//organic hydroxy compound biosynthetic process//biosynthetic process//flavonoid biosynthetic process//flavonoid metabolic process//flavonol biosynthetic process//biological_process//flavonol metabolic process//pigment biosynthetic process//oxidation-reduction process//flavone biosynthetic process//pigment metabolic process//met…	GO:0005623//GO:0005622//GO:0044464//GO:0044424//GO:0005737//GO:0005575	cell//intracellular//cell part//intracellular part//cytoplasm//cellular_component	GO:0016705//GO:0045486//GO:0031418//GO:0043169//GO:0005488//GO:0043168//GO:0031406//GO:0019842//GO:0046872//GO:0045431//GO:0016491//GO:0030246//GO:0003824//GO:0051213//GO:0016706//GO:0003674//GO:0036094//GO:0043167//GO:0043177//GO:0048029	oxidoreductase activity, acting on paired donors, with incorporation or reduction of molecular oxygen//naringenin 3-dioxygenase activity//L-ascorbic acid binding//cation binding//binding//anion binding//carboxylic acid binding//vitamin binding//metal ion binding//flavonol synthase activity//oxidoreductase activity//carbohydrate binding//catalytic activity//dioxygenase activity//oxidoreductase act…	K05278 flavonol synthase [EC:1.14.11.23] | (RefSeq) FLS; flavonol synthase	http://www.genome.jp/dbget-bin/www_bget?sot:102577717	-	Isopenicillin N synthase-like||Non-haem dioxygenase N-terminal domain||Oxoglutarate/iron-dependent dioxygenase
313	PGSC0003DMG400014221	2098.85	962.102	1.1253	0.0015725	0.013998	UP	--	--	--	--	GO:0043168//GO:0005488//GO:0032559//GO:0032549//GO:0097367//GO:1901265//GO:0017076//GO:0000166//GO:0001883//GO:0001882//GO:0032553//GO:0005524//GO:0035639//GO:0032555//GO:0032550//GO:0043167//GO:0003674//GO:0036094//GO:1901363//GO:0030554//GO:0097159	anion binding//binding//adenyl ribonucleotide binding//ribonucleoside binding//carbohydrate derivative binding//nucleoside phosphate binding//purine nucleotide binding//nucleotide binding//purine nucleoside binding//nucleoside binding//ribonucleotide binding//ATP binding//purine ribonucleoside triphosphate binding//purine ribonucleotide binding//purine ribonucleoside binding//ion binding//molecul…	no KO assigned | (RefSeq) ribulose bisphosphate carboxylase/oxygenase activase, chloroplastic	http://www.genome.jp/dbget-bin/www_bget?sot:102595386	-	P-loop containing nucleoside triphosphate hydrolase||ATPase, AAA-type, core
314	PGSC0003DMG400014253	601.565	182.346	1.722	9.514e-08	4.13e-06	UP	GO:0016053//GO:0044237//GO:0044255//GO:0046394//GO:0006633//GO:0019752//GO:0006629//GO:0043436//GO:0044238//GO:0009058//GO:0008152//GO:0032787//GO:0071704//GO:1901576//GO:0006631//GO:0044283//GO:0044249//GO:0008150//GO:0009987//GO:0044281//GO:0006082//GO:0008610//GO:0072330	organic acid biosynthetic process//cellular metabolic process//cellular lipid metabolic process//carboxylic acid biosynthetic process//fatty acid biosynthetic process//carboxylic acid metabolic process//lipid metabolic process//oxoacid metabolic process//primary metabolic process//biosynthetic process//metabolic process//monocarboxylic acid metabolic process//organic substance metabolic process//…	--	--	--	--	no KO assigned | (RefSeq) acyl carrier protein-like	http://www.genome.jp/dbget-bin/www_bget?sot:102585547	ACP4	Phosphopantetheine binding ACP domain||Acyl carrier protein (ACP)||Phosphopantetheine attachment site
315	PGSC0003DMG400014259	19.6596	0.307304	5.9994	0.0029105	0.022517	UP	--	--	GO:0005575//GO:0016020//GO:0031224//GO:0044425//GO:0016021	cellular_component//membrane//intrinsic component of membrane//membrane part//integral component of membrane	--	--	--	--	--	--
316	PGSC0003DMG400014264	251.377	104.915	1.2606	0.0017978	0.015541	UP	--	--	--	--	--	--	no KO assigned | (RefSeq) traB domain-containing protein	http://www.genome.jp/dbget-bin/www_bget?sot:102588375	-	Pheromone shutdown, TraB
317	PGSC0003DMG400014268	552.825	271.632	1.0252	0.0011623	0.011022	UP	GO:0016053//GO:0044237//GO:0009067//GO:0009089//GO:0046394//GO:0006553//GO:1901607//GO:0019752//GO:0006091//GO:0046451//GO:0019684//GO:0044238//GO:0043436//GO:0009058//GO:0006807//GO:0015979//GO:0008152//GO:0009085//GO:1901605//GO:0071704//GO:0006520//GO:0043648//GO:1901576//GO:0044283//GO:1901564//GO:0008150//GO:0044249//GO:1901566//GO:0044281//GO:0009987//GO:0009066//GO:0055114//GO:0008652//GO:…	organic acid biosynthetic process//cellular metabolic process//aspartate family amino acid biosynthetic process//lysine biosynthetic process via diaminopimelate//carboxylic acid biosynthetic process//lysine metabolic process//alpha-amino acid biosynthetic process//carboxylic acid metabolic process//generation of precursor metabolites and energy//diaminopimelate metabolic process//photosynthesis, …	GO:0044424//GO:0044435//GO:0044446//GO:0043229//GO:0044422//GO:0044444//GO:0005623//GO:0044434//GO:0044464//GO:0005622//GO:0009507//GO:0005737//GO:0043227//GO:0043231//GO:0005575//GO:0009536//GO:0009570//GO:0009532//GO:0043226	intracellular part//plastid part//intracellular organelle part//intracellular organelle//organelle part//cytoplasmic part//cell//chloroplast part//cell part//intracellular//chloroplast//cytoplasm//membrane-bounded organelle//intracellular membrane-bounded organelle//cellular_component//plastid//chloroplast stroma//plastid stroma//organelle	GO:0016627//GO:0016628//GO:0008839//GO:0003674//GO:0003824//GO:0016491	oxidoreductase activity, acting on the CH-CH group of donors//oxidoreductase activity, acting on the CH-CH group of donors, NAD or NADP as acceptor//4-hydroxy-tetrahydrodipicolinate reductase//molecular_function//catalytic activity//oxidoreductase activity	K16908 chloroplast NAD(P)H dehydrogenase [EC:1.6.99.-] | (RefSeq) dihydrodipicolinate reductase-like protein CRR1, chloroplastic	http://www.genome.jp/dbget-bin/www_bget?sot:102586399	crr1	Dihydrodipicolinate reductase, N-terminal||Dihydrodipicolinate reductase, C-terminal||Dihydrodipicolinate reductase||NAD(P)-binding domain
318	PGSC0003DMG400014322	194.999	17.4151	3.4851	2.4518e-08	1.2557e-06	UP	--	--	--	--	--	--	no KO assigned | (RefSeq) CEN-like protein 1	http://www.genome.jp/dbget-bin/www_bget?sot:102579229	-	Phosphatidylethanolamine-binding protein||Phosphatidylethanolamine-binding, conserved site
319	PGSC0003DMG400014371	1056.7	488.945	1.1118	8.3098e-05	0.0013241	UP	GO:0008150//GO:0043412//GO:0000413//GO:0009987//GO:0008152//GO:0044260//GO:0071704//GO:0044267//GO:0019538//GO:0036211//GO:0044238//GO:0044237//GO:0018193//GO:0018208//GO:0006464//GO:0043170	biological_process//macromolecule modification//protein peptidyl-prolyl isomerization//cellular process//metabolic process//cellular macromolecule metabolic process//organic substance metabolic process//cellular protein metabolic process//protein metabolic process//protein modification process//primary metabolic process//cellular metabolic process//peptidyl-amino acid modification//peptidyl-proli…	GO:0009536//GO:0043226//GO:0009507//GO:0005737//GO:0043231//GO:0005575//GO:0043227//GO:0044444//GO:0005623//GO:0005622//GO:0044464//GO:0044424//GO:0043229	plastid//organelle//chloroplast//cytoplasm//intracellular membrane-bounded organelle//cellular_component//membrane-bounded organelle//cytoplasmic part//cell//intracellular//cell part//intracellular part//intracellular organelle	GO:0016859//GO:0003824//GO:0003755//GO:0016853//GO:0003674	cis-trans isomerase activity//catalytic activity//peptidyl-prolyl cis-trans isomerase activity//isomerase activity//molecular_function	no KO assigned | (RefSeq) peptidyl-prolyl cis-trans isomerase FKBP16-1, chloroplastic	http://www.genome.jp/dbget-bin/www_bget?sot:102604423	-	Peptidyl-prolyl cis-trans isomerase, FKBP-type||FKBP-type peptidyl-prolyl cis-trans isomerase domain
320	PGSC0003DMG400014386	17873.8	7667.41	1.221	6.3451e-05	0.0010544	UP	GO:0043412//GO:0008150//GO:0009987//GO:0015979//GO:0008152//GO:0071704//GO:0044260//GO:0009765//GO:0006091//GO:0044267//GO:0018298//GO:0019684//GO:0036211//GO:0044238//GO:0019538//GO:0044237//GO:0043170//GO:0006464	macromolecule modification//biological_process//cellular process//photosynthesis//metabolic process//organic substance metabolic process//cellular macromolecule metabolic process//photosynthesis, light harvesting//generation of precursor metabolites and energy//cellular protein metabolic process//protein-chromophore linkage//photosynthesis, light reaction//protein modification process//primary me…	GO:0009536//GO:0044436//GO:0031976//GO:0098796//GO:0043226//GO:0034357//GO:0009579//GO:0009507//GO:0005737//GO:0032991//GO:0016020//GO:0043227//GO:0031984//GO:0043231//GO:0005575//GO:0009521//GO:0009534//GO:0044444//GO:0005623//GO:0009523//GO:0009522//GO:0044434//GO:0044464//GO:0031224//GO:0005622//GO:0055035//GO:0044424//GO:0044425//GO:0042651//GO:0009535//GO:0044435//GO:0043229//GO:0044446//GO:…	plastid//thylakoid part//plastid thylakoid//membrane protein complex//organelle//photosynthetic membrane//thylakoid//chloroplast//cytoplasm//protein-containing complex//membrane//membrane-bounded organelle//organelle subcompartment//intracellular membrane-bounded organelle//cellular_component//photosystem//chloroplast thylakoid//cytoplasmic part//cell//photosystem II//photosystem I//chloroplast p…	GO:1901363//GO:0097159//GO:0046906//GO:0016168//GO:0003674//GO:0005488	heterocyclic compound binding//organic cyclic compound binding//tetrapyrrole binding//chlorophyll binding//molecular_function//binding	K08908 light-harvesting complex I chlorophyll a/b binding protein 2 | (RefSeq) chlorophyll a-b binding protein 7, chloroplastic	http://www.genome.jp/dbget-bin/www_bget?sot:102594790	LHCA2	Chlorophyll A-B binding protein, plant||Chlorophyll a/b binding protein domain||Chlorophyll A-B binding protein
321	PGSC0003DMG400014394	1289.59	505.722	1.3505	1.1212e-06	3.5076e-05	UP	GO:0009628//GO:0050896//GO:0044085//GO:0070727//GO:0051179//GO:0006996//GO:0071840//GO:0022607//GO:0045184//GO:0006886//GO:0090391//GO:0016043//GO:0015031//GO:0008104//GO:0051234//GO:0006810//GO:0008150//GO:0080167//GO:0009658//GO:0046907//GO:0009987//GO:0051641//GO:0071702//GO:0009657//GO:0033036//GO:0034613//GO:0051649	response to abiotic stimulus//response to stimulus//cellular component biogenesis//cellular macromolecule localization//localization//organelle organization//cellular component organization or biogenesis//cellular component assembly//establishment of protein localization//intracellular protein transport//granum assembly//cellular component organization//protein transport//protein localization//es…	GO:0031967//GO:0044434//GO:0044444//GO:0005623//GO:0005622//GO:0044464//GO:0009941//GO:0044424//GO:0044422//GO:0044446//GO:0043229//GO:0044435//GO:0009570//GO:0009536//GO:0043226//GO:0031975//GO:0009532//GO:0005737//GO:0009507//GO:0005575//GO:0009526//GO:0043231//GO:0043227	organelle envelope//chloroplast part//cytoplasmic part//cell//intracellular//cell part//chloroplast envelope//intracellular part//organelle part//intracellular organelle part//intracellular organelle//plastid part//chloroplast stroma//plastid//organelle//envelope//plastid stroma//cytoplasm//chloroplast//cellular_component//plastid envelope//intracellular membrane-bounded organelle//membrane-bound…	--	--	no KO assigned | (RefSeq) protein LHCP TRANSLOCATION DEFECT	http://www.genome.jp/dbget-bin/www_bget?sot:102589462	GDC1	Ankyrin repeat-containing domain
322	PGSC0003DMG400014408	984.51	138.526	2.8292	0.002599	0.020694	UP	--	--	GO:0016021//GO:0044425//GO:0031224//GO:0016020//GO:0005575	integral component of membrane//membrane part//intrinsic component of membrane//membrane//cellular_component	--	--	no KO assigned | (RefSeq) fasciclin-like arabinogalactan protein 1	http://www.genome.jp/dbget-bin/www_bget?sot:102601845	-	Fasciclin-like arabinogalactan protein||FAS1 domain
323	PGSC0003DMG400014490	56.8926	8.01907	2.8267	0.0020918	0.017504	UP	--	--	--	--	--	--	no KO assigned | (RefSeq) uncharacterized LOC102586738	http://www.genome.jp/dbget-bin/www_bget?sot:102586738	--	--
324	PGSC0003DMG400014549	19.8723	0	Inf	0.00080489	0.0082078	UP	GO:0071704//GO:1901576//GO:0006631//GO:0008152//GO:0032787//GO:0009987//GO:0044281//GO:0006082//GO:0008610//GO:0072330//GO:0044283//GO:0044249//GO:0008150//GO:0044255//GO:0046394//GO:0016053//GO:0044237//GO:0043436//GO:0044238//GO:0009058//GO:0006633//GO:0019752//GO:0006629	organic substance metabolic process//organic substance biosynthetic process//fatty acid metabolic process//metabolic process//monocarboxylic acid metabolic process//cellular process//small molecule metabolic process//organic acid metabolic process//lipid biosynthetic process//monocarboxylic acid biosynthetic process//small molecule biosynthetic process//cellular biosynthetic process//biological_p…	GO:0016020//GO:0005575//GO:0016021//GO:0044425//GO:0031224	membrane//cellular_component//integral component of membrane//membrane part//intrinsic component of membrane	GO:0003674//GO:0016746//GO:0003824//GO:0016747//GO:0016740	molecular_function//transferase activity, transferring acyl groups//catalytic activity//transferase activity, transferring acyl groups other than amino-acyl groups//transferase activity	K15397 3-ketoacyl-CoA synthase [EC:2.3.1.199] | (RefSeq) 3-ketoacyl-CoA synthase 6-like	http://www.genome.jp/dbget-bin/www_bget?sot:102579720	-	3-Oxoacyl-[acyl-carrier-protein (ACP)] synthase III, C-terminal||Thiolase-like||Very-long-chain 3-ketoacyl-CoA synthase||FAE1/Type III polyketide synthase-like protein
325	PGSC0003DMG400014553	37.163	3.75825	3.3057	0.0026746	0.021151	UP	--	--	--	--	GO:0003674//GO:0097159//GO:1901363//GO:0003676//GO:0005488	molecular_function//organic cyclic compound binding//heterocyclic compound binding//nucleic acid binding//binding	no KO assigned | (RefSeq) zinc finger protein 6-like	http://www.genome.jp/dbget-bin/www_bget?sot:102581382	-	Zinc finger C2H2-type
326	PGSC0003DMG400014558	654.393	148.793	2.1369	0.0010465	0.010156	UP	GO:0009607//GO:0032101//GO:0002376//GO:0050789//GO:0002682//GO:0008150//GO:0045088//GO:0051707//GO:0048583//GO:0009627//GO:0043207//GO:0009814//GO:0006955//GO:0098542//GO:0010112//GO:0031347//GO:0065007//GO:0006952//GO:0050896//GO:0050776//GO:0045087//GO:0043900//GO:0002831//GO:0051704//GO:0009605//GO:0006950//GO:0080134	response to biotic stimulus//regulation of response to external stimulus//immune system process//regulation of biological process//regulation of immune system process//biological_process//regulation of innate immune response//response to other organism//regulation of response to stimulus//systemic acquired resistance//response to external biotic stimulus//defense response, incompatible interactio…	--	--	--	--	no KO assigned | (RefSeq) uncharacterized LOC102602124	http://www.genome.jp/dbget-bin/www_bget?sot:102602124	-	NPR1/NH1-interacting protein||Protein NIM1-INTERACTING 2
327	PGSC0003DMG400014560	110.37	36.4568	1.5981	0.0038157	0.027754	UP	GO:1901575//GO:0006807//GO:0090304//GO:0046483//GO:0044238//GO:0006259//GO:0034641//GO:1901361//GO:0034655//GO:0006308//GO:0043170//GO:0006139//GO:1901360//GO:0044237//GO:0090305//GO:0009056//GO:0009057//GO:0044248//GO:0009987//GO:0008150//GO:0044270//GO:0019439//GO:0044260//GO:0046700//GO:0006725//GO:0071704//GO:0008152//GO:0044265	organic substance catabolic process//nitrogen compound metabolic process//nucleic acid metabolic process//heterocycle metabolic process//primary metabolic process//DNA metabolic process//cellular nitrogen compound metabolic process//organic cyclic compound catabolic process//nucleobase-containing compound catabolic process//DNA catabolic process//macromolecule metabolic process//nucleobase-contai…	--	--	GO:0004519//GO:0005488//GO:0004518//GO:0097159//GO:0016788//GO:0003824//GO:0003676//GO:1901363//GO:0003674//GO:0016787	endonuclease activity//binding//nuclease activity//organic cyclic compound binding//hydrolase activity, acting on ester bonds//catalytic activity//nucleic acid binding//heterocyclic compound binding//molecular_function//hydrolase activity	no KO assigned | (RefSeq) endonuclease 2	http://www.genome.jp/dbget-bin/www_bget?sot:102603473	ENDO 2	Phospholipase C/P1 nuclease domain||S1/P1 nuclease
328	PGSC0003DMG400014577	447.27	115.958	1.9475	1.8469e-08	9.971e-07	UP	GO:0044267//GO:0019538//GO:0036211//GO:0044238//GO:0006468//GO:0044237//GO:0006464//GO:0016310//GO:0043170//GO:0008150//GO:0043412//GO:0006796//GO:0009987//GO:0006793//GO:0008152//GO:0044260//GO:0071704	cellular protein metabolic process//protein metabolic process//protein modification process//primary metabolic process//protein phosphorylation//cellular metabolic process//cellular protein modification process//phosphorylation//macromolecule metabolic process//biological_process//macromolecule modification//phosphate-containing compound metabolic process//cellular process//phosphorus metabolic p…	GO:0031224//GO:0044425//GO:0016021//GO:0005575//GO:0016020	intrinsic component of membrane//membrane part//integral component of membrane//cellular_component//membrane	GO:0016772//GO:0001882//GO:0004672//GO:0001883//GO:0000166//GO:0016773//GO:0032559//GO:0032549//GO:0005488//GO:0043168//GO:0017076//GO:1901265//GO:0097367//GO:0016740//GO:0030554//GO:0003824//GO:1901363//GO:0097159//GO:0032550//GO:0032555//GO:0035639//GO:0005524//GO:0032553//GO:0016301//GO:0036094//GO:0003674//GO:0043167	transferase activity, transferring phosphorus-containing groups//nucleoside binding//protein kinase activity//purine nucleoside binding//nucleotide binding//phosphotransferase activity, alcohol group as acceptor//adenyl ribonucleotide binding//ribonucleoside binding//binding//anion binding//purine nucleotide binding//nucleoside phosphate binding//carbohydrate derivative binding//transferase activ…	K04733 interleukin-1 receptor-associated kinase 4 [EC:2.7.11.1] | (RefSeq) probable receptor-like protein kinase At1g67000	http://www.genome.jp/dbget-bin/www_bget?sot:102605277	-	Protein kinase-like domain||Wall-associated receptor kinase, C-terminal||Serine/threonine-protein kinase, active site||Protein kinase, ATP binding site||Protein kinase domain
329	PGSC0003DMG400014578	123.088	44.8568	1.4563	0.0046653	0.032412	UP	GO:0044237//GO:0016310//GO:0043170//GO:0006464//GO:0044267//GO:0006468//GO:0044238//GO:0036211//GO:0019538//GO:0008152//GO:0006793//GO:0071704//GO:0044260//GO:0043412//GO:0008150//GO:0009987//GO:0006796	cellular metabolic process//phosphorylation//macromolecule metabolic process//cellular protein modification process//cellular protein metabolic process//protein phosphorylation//primary metabolic process//protein modification process//protein metabolic process//metabolic process//phosphorus metabolic process//organic substance metabolic process//cellular macromolecule metabolic process//macromole…	--	--	GO:0043168//GO:0032559//GO:0032549//GO:0005488//GO:1901265//GO:0097367//GO:0017076//GO:0001883//GO:0000166//GO:0001882//GO:0016772//GO:0004672//GO:0016773//GO:0032553//GO:0005524//GO:0016301//GO:0032550//GO:0035639//GO:0032555//GO:0043167//GO:0003674//GO:0036094//GO:0030554//GO:0003824//GO:1901363//GO:0016740//GO:0097159	anion binding//adenyl ribonucleotide binding//ribonucleoside binding//binding//nucleoside phosphate binding//carbohydrate derivative binding//purine nucleotide binding//purine nucleoside binding//nucleotide binding//nucleoside binding//transferase activity, transferring phosphorus-containing groups//protein kinase activity//phosphotransferase activity, alcohol group as acceptor//ribonucleotide bi…	no KO assigned | (RefSeq) probable receptor-like protein kinase At1g67000	http://www.genome.jp/dbget-bin/www_bget?sot:102578953	-	Protein kinase domain||Serine/threonine-protein kinase, active site||Protein kinase-like domain
330	PGSC0003DMG400014590	418.739	121.41	1.7862	0.00011584	0.0017341	UP	GO:0009987//GO:0008150//GO:0006334//GO:0070271//GO:0071824//GO:0051276//GO:0034728//GO:0022607//GO:0071840//GO:0006996//GO:0016043//GO:0031497//GO:0006325//GO:0065003//GO:0071103//GO:0044085//GO:0043933//GO:0034622//GO:0065004//GO:0006333//GO:0006323	cellular process//biological_process//nucleosome assembly//obsolete protein complex biogenesis//protein-DNA complex subunit organization//chromosome organization//nucleosome organization//cellular component assembly//cellular component organization or biogenesis//organelle organization//cellular component organization//chromatin assembly//chromatin organization//protein-containing complex assembl…	GO:0043226//GO:0032993//GO:0000785//GO:0043231//GO:0005575//GO:0044815//GO:0000786//GO:0043227//GO:0032991//GO:0005634//GO:0005622//GO:0044464//GO:0043228//GO:0044427//GO:0005623//GO:0043229//GO:0044446//GO:0044422//GO:0005694//GO:0043232//GO:0044424	organelle//protein-DNA complex//chromatin//intracellular membrane-bounded organelle//cellular_component//DNA packaging complex//nucleosome//membrane-bounded organelle//protein-containing complex//nucleus//intracellular//cell part//non-membrane-bounded organelle//chromosomal part//cell//intracellular organelle//intracellular organelle part//organelle part//chromosome//intracellular non-membrane-bo…	GO:0097159//GO:1901363//GO:0003676//GO:0003674//GO:0003677//GO:0005488	organic cyclic compound binding//heterocyclic compound binding//nucleic acid binding//molecular_function//DNA binding//binding	no KO assigned | (RefSeq) HMG-Y-related protein B-like	http://www.genome.jp/dbget-bin/www_bget?sot:102597480	-	Linker histone H1/H5, domain H15||AT hook, DNA-binding motif||Winged helix-turn-helix DNA-binding domain||High mobility group protein HMGA, plant
331	PGSC0003DMG400014617	50.2981	4.11356	3.612	0.00018505	0.0025279	UP	GO:0008152//GO:0008150	metabolic process//biological_process	--	--	GO:0016758//GO:0016757//GO:0003674//GO:0016740//GO:0003824	transferase activity, transferring hexosyl groups//transferase activity, transferring glycosyl groups//molecular_function//transferase activity//catalytic activity	no KO assigned | (RefSeq) cinnamate beta-D-glucosyltransferase-like	http://www.genome.jp/dbget-bin/www_bget?sot:102603881	-	UDP-glucuronosyl/UDP-glucosyltransferase||UDP-glycosyltransferase family, conserved site
332	PGSC0003DMG400014620	67.238	2.89415	4.5381	0.00090038	0.0089824	UP	--	--	--	--	--	--	--	--	--	--
333	PGSC0003DMG400014703	1672.59	796.886	1.0696	6.4901e-05	0.001076	UP	--	--	GO:0005575//GO:0016020//GO:0031224//GO:0016021//GO:0044425	cellular_component//membrane//intrinsic component of membrane//integral component of membrane//membrane part	--	--	no KO assigned | (RefSeq) uncharacterized LOC102582274	http://www.genome.jp/dbget-bin/www_bget?sot:102582274	--	--
334	PGSC0003DMG400014712	291.069	123.402	1.238	0.002826	0.02204	UP	--	--	--	--	--	--	no KO assigned | (RefSeq) protein FLUORESCENT IN BLUE LIGHT, chloroplastic-like	http://www.genome.jp/dbget-bin/www_bget?sot:102586913	-	Tetratricopeptide-like helical domain||Tetratricopeptide repeat-containing domain
335	PGSC0003DMG400014778	1754.72	496.246	1.8221	5.1689e-12	6.259e-10	UP	--	--	--	--	GO:0050366//GO:0016410//GO:0016407//GO:0016740//GO:0016747//GO:0003824//GO:0003674//GO:0008080//GO:0016746	tyramine N-feruloyltransferase activity//N-acyltransferase activity//acetyltransferase activity//transferase activity//transferase activity, transferring acyl groups other than amino-acyl groups//catalytic activity//molecular_function//N-acetyltransferase activity//transferase activity, transferring acyl groups	no KO assigned | (RefSeq) tyramine N-feruloyltransferase 4/11-like	http://www.genome.jp/dbget-bin/www_bget?sot:102580051	-	GNAT domain||Acyl-CoA N-acyltransferase
336	PGSC0003DMG400014798	365.337	164.544	1.1508	0.0076503	0.046849	UP	--	--	GO:0005575//GO:0016020//GO:0044425//GO:0016021//GO:0031224	cellular_component//membrane//membrane part//integral component of membrane//intrinsic component of membrane	--	--	no KO assigned | (RefSeq) uncharacterized LOC102577732	http://www.genome.jp/dbget-bin/www_bget?sot:102577732	--	--
337	PGSC0003DMG400015132	118.835	38.2874	1.634	0.0067156	0.04251	UP	GO:0008150//GO:0006952//GO:0050896//GO:0006950	biological_process//defense response//response to stimulus//response to stress	--	--	--	--	no KO assigned | (RefSeq) defensin J1-2	http://www.genome.jp/dbget-bin/www_bget?sot:102603276	-	Knottin, scorpion toxin-like||Defensin, plant
338	PGSC0003DMG400015165	7167.63	3419.17	1.0679	0.00079568	0.008132	UP	GO:0008152//GO:0008150	metabolic process//biological_process	GO:0009526//GO:0005575//GO:0043231//GO:0043227//GO:0005737//GO:0009507//GO:0043226//GO:0031975//GO:0009532//GO:0009570//GO:0009536//GO:0044422//GO:0043229//GO:0044446//GO:0044435//GO:0044424//GO:0005622//GO:0009941//GO:0044464//GO:0031967//GO:0044434//GO:0044444//GO:0005623	plastid envelope//cellular_component//intracellular membrane-bounded organelle//membrane-bounded organelle//cytoplasm//chloroplast//organelle//envelope//plastid stroma//chloroplast stroma//plastid//organelle part//intracellular organelle//intracellular organelle part//plastid part//intracellular part//intracellular//chloroplast envelope//cell part//organelle envelope//chloroplast part//cytoplasmi…	GO:0003674//GO:0016787//GO:0003824	molecular_function//hydrolase activity//catalytic activity	no KO assigned | (RefSeq) haloacid dehalogenase-like hydrolase domain-containing protein At3g48420	http://www.genome.jp/dbget-bin/www_bget?sot:102605195	-	HAD-like domain||HAD hydrolase, subfamily IA
339	PGSC0003DMG400015290	81.4284	18.9168	2.1059	0.0012568	0.011717	UP	GO:0044237//GO:0051336//GO:0009892//GO:0043170//GO:0030162//GO:0019222//GO:0032268//GO:0032269//GO:0044267//GO:0050794//GO:0051248//GO:0052548//GO:0060255//GO:0051346//GO:0065007//GO:0048523//GO:0031324//GO:0044238//GO:0065009//GO:0019538//GO:0045861//GO:0052547//GO:0050790//GO:0010466//GO:0008152//GO:0006508//GO:0071704//GO:0010951//GO:0010605//GO:0044260//GO:0044092//GO:0051246//GO:0043086//GO:…	cellular metabolic process//regulation of hydrolase activity//negative regulation of metabolic process//macromolecule metabolic process//regulation of proteolysis//regulation of metabolic process//regulation of cellular protein metabolic process//negative regulation of cellular protein metabolic process//cellular protein metabolic process//regulation of cellular process//negative regulation of pr…	--	--	GO:0098772//GO:0030414//GO:0004857//GO:0061135//GO:0004866//GO:0030234//GO:0061134//GO:0003674//GO:0004867	molecular function regulator//peptidase inhibitor activity//enzyme inhibitor activity//endopeptidase regulator activity//endopeptidase inhibitor activity//enzyme regulator activity//peptidase regulator activity//molecular_function//serine-type endopeptidase inhibitor activity	no KO assigned | (RefSeq) pin2; proteinase inhibitor type-2	http://www.genome.jp/dbget-bin/www_bget?sot:102581269	-	Proteinase inhibitor I20
340	PGSC0003DMG400015345	29.4438	3.23966	3.184	0.0081698	0.049185	UP	--	--	--	--	--	--	no KO assigned | (RefSeq) receptor-like protein 12	http://www.genome.jp/dbget-bin/www_bget?sot:102597584	-	Leucine-rich repeat||Leucine-rich repeat domain, L domain-like||Leucine-rich repeat, typical subtype
341	PGSC0003DMG400015414	3464.34	826.91	2.0668	1.5555e-10	1.3684e-08	UP	--	--	--	--	GO:0005509//GO:0043167//GO:0003674//GO:0005488//GO:0046872//GO:0043169	calcium ion binding//ion binding//molecular_function//binding//metal ion binding//cation binding	--	--	-	EF-hand domain pair||EF-hand domain||EF-Hand 1, calcium-binding site
342	PGSC0003DMG400015419	242.914	39.7634	2.6109	5.5198e-09	3.3203e-07	UP	--	--	--	--	--	--	no KO assigned | (RefSeq) uncharacterized LOC102603124	http://www.genome.jp/dbget-bin/www_bget?sot:102603124	--	--
343	PGSC0003DMG400015492	103.414	30.7044	1.7519	0.0018224	0.01569	UP	--	--	--	--	GO:1901363//GO:0030554//GO:0097159//GO:0005524//GO:0032553//GO:0032555//GO:0035639//GO:0032550//GO:0043167//GO:0036094//GO:0003674//GO:0000166//GO:0001883//GO:0001882//GO:0043168//GO:0005488//GO:0032559//GO:0032549//GO:0097367//GO:1901265//GO:0017076	heterocyclic compound binding//adenyl nucleotide binding//organic cyclic compound binding//ATP binding//ribonucleotide binding//purine ribonucleotide binding//purine ribonucleoside triphosphate binding//purine ribonucleoside binding//ion binding//small molecule binding//molecular_function//nucleotide binding//purine nucleoside binding//nucleoside binding//anion binding//binding//adenyl ribonucleo…	no KO assigned | (RefSeq) protein HYPER-SENSITIVITY-RELATED 4	http://www.genome.jp/dbget-bin/www_bget?sot:102594543	-	AAA-type ATPase, N-terminal domain||AAA+ ATPase domain||ATPase, AAA-type, core||ATPase, AAA-type, conserved site||P-loop containing nucleoside triphosphate hydrolase
344	PGSC0003DMG400015535	48.2405	5.97675	3.0128	0.0012905	0.011968	UP	--	--	GO:0044424//GO:0043229//GO:0005623//GO:0005634//GO:0005622//GO:0044464//GO:0043231//GO:0005575//GO:0043227//GO:0043226	intracellular part//intracellular organelle//cell//nucleus//intracellular//cell part//intracellular membrane-bounded organelle//cellular_component//membrane-bounded organelle//organelle	GO:0005488//GO:0003677//GO:0003674//GO:1901363//GO:0003676//GO:0097159	binding//DNA binding//molecular_function//heterocyclic compound binding//nucleic acid binding//organic cyclic compound binding	no KO assigned | (RefSeq) methyl-CpG-binding domain-containing protein 7	http://www.genome.jp/dbget-bin/www_bget?sot:102585353	MBD7	DNA-binding domain||Methyl-CpG DNA binding
345	PGSC0003DMG400015664	77.6251	1.84382	5.3957	2.7569e-05	0.0005242	UP	--	--	GO:0005575//GO:0016020//GO:0031224//GO:0044425//GO:0016021	cellular_component//membrane//intrinsic component of membrane//membrane part//integral component of membrane	--	--	no KO assigned | (RefSeq) cysteine-rich repeat secretory protein 60	http://www.genome.jp/dbget-bin/www_bget?sot:102606283	-	Gnk2-homologous domain
346	PGSC0003DMG400015881	88.6488	11.4032	2.9587	1.9527e-05	0.00039811	UP	GO:0008150//GO:0071704//GO:0005975//GO:0008152//GO:0044238	biological_process//organic substance metabolic process//carbohydrate metabolic process//metabolic process//primary metabolic process	--	--	GO:0003824//GO:0030246//GO:0003674//GO:0004553//GO:0016787//GO:0016798//GO:0005488	catalytic activity//carbohydrate binding//molecular_function//hydrolase activity, hydrolyzing O-glycosyl compounds//hydrolase activity//hydrolase activity, acting on glycosyl bonds//binding	K15925 alpha-D-xyloside xylohydrolase [EC:3.2.1.177] | (RefSeq) alpha-xylosidase 1-like	http://www.genome.jp/dbget-bin/www_bget?sot:102596982	-	Glycoside hydrolase family 31, N-terminal domain||Galactose mutarotase, N-terminal barrel||Glycosyl hydrolases family 31, conserved site||Glycoside hydrolase family 31||Glycosyl hydrolases family 31, active site||Galactose mutarotase-like domain||Glycoside hydrolase superfamily
347	PGSC0003DMG400015933	425.804	100.142	2.0881	0.00013858	0.0019946	UP	GO:0042545//GO:0065007//GO:0044238//GO:0071554//GO:0065009//GO:0016043//GO:0005976//GO:0045488//GO:0045229//GO:0071840//GO:1901575//GO:0071555//GO:0009892//GO:0043170//GO:0019222//GO:0000272//GO:0043086//GO:0050789//GO:0008150//GO:0009987//GO:0009057//GO:0010393//GO:0048519//GO:0009056//GO:0050790//GO:0008152//GO:0045490//GO:0071704//GO:0005975//GO:0016052//GO:0044092	cell wall modification//biological regulation//primary metabolic process//cell wall organization or biogenesis//regulation of molecular function//cellular component organization//polysaccharide metabolic process//pectin metabolic process//external encapsulating structure organization//cellular component organization or biogenesis//organic substance catabolic process//cell wall organization//negat…	GO:0005618//GO:0005623//GO:0044464//GO:0005576//GO:0030312//GO:0071944//GO:0005575	cell wall//cell//cell part//extracellular region//external encapsulating structure//cell periphery//cellular_component	GO:0045330//GO:0098772//GO:0004857//GO:0003824//GO:0016788//GO:0052689//GO:0030234//GO:0016787//GO:0003674//GO:0030599	aspartyl esterase activity//molecular function regulator//enzyme inhibitor activity//catalytic activity//hydrolase activity, acting on ester bonds//carboxylic ester hydrolase activity//enzyme regulator activity//hydrolase activity//molecular_function//pectinesterase activity	K01051 pectinesterase [EC:3.1.1.11] | (RefSeq) pectinesterase/pectinesterase inhibitor PPE8B-like	http://www.genome.jp/dbget-bin/www_bget?sot:102587467	-	Pectinesterase, Asp active site||Pectin lyase fold/virulence factor||Pectinesterase, Tyr active site||Pectinesterase, catalytic||Pectinesterase inhibitor domain||Pectin lyase fold
348	PGSC0003DMG400015959	84.8829	21.9065	1.9541	0.0022939	0.018838	UP	--	--	--	--	--	--	--	--	--	--
349	PGSC0003DMG400016052	105.208	23.6381	2.1541	0.00030496	0.0037722	UP	--	--	--	--	--	--	K04733 interleukin-1 receptor-associated kinase 4 [EC:2.7.11.1] | (RefSeq) probable receptor-like protein kinase At5g39020	http://www.genome.jp/dbget-bin/www_bget?sot:102603956	-	Protein kinase-like domain
350	PGSC0003DMG400016187	1940.21	832.047	1.2215	7.9556e-05	0.0012793	UP	--	--	GO:0031224//GO:0016021//GO:0044425//GO:0016020//GO:0005575	intrinsic component of membrane//integral component of membrane//membrane part//membrane//cellular_component	--	--	K17279 receptor expression-enhancing protein 5/6 | (RefSeq) HVA22-like protein e	http://www.genome.jp/dbget-bin/www_bget?sot:102596665	-	TB2/DP1/HVA22-related protein
351	PGSC0003DMG400016257	287.742	71.2869	2.0131	4.4096e-07	1.5626e-05	UP	--	--	GO:0031224//GO:0016021//GO:0044425//GO:0005575//GO:0016020	intrinsic component of membrane//integral component of membrane//membrane part//cellular_component//membrane	--	--	--	--	--	--
352	PGSC0003DMG400016377	86.7713	23.9713	1.8559	0.0030908	0.023558	UP	--	--	--	--	--	--	no KO assigned | (RefSeq) transcription factor bHLH111	http://www.genome.jp/dbget-bin/www_bget?sot:102589772	--	--
353	PGSC0003DMG400016429	123.691	48.6506	1.3462	0.0065635	0.041785	UP	--	--	--	--	--	--	no KO assigned | (RefSeq) cysteine-rich receptor-like protein kinase 2	http://www.genome.jp/dbget-bin/www_bget?sot:102596000	--	--
354	PGSC0003DMG400016469	19.0979	0	Inf	0.0011922	0.011237	UP	--	--	--	--	--	--	no KO assigned | (RefSeq) probable F-box protein At4g22030	http://www.genome.jp/dbget-bin/www_bget?sot:102603847	-	Petal formation-expressed
355	PGSC0003DMG400016481	5632.89	2514.55	1.1636	3.4226e-05	0.00062879	UP	--	--	--	--	--	--	no KO assigned | (RefSeq) SS3, SSIII, SSSIII; soluble starch synthase	http://www.genome.jp/dbget-bin/www_bget?sot:102577674	--	--
356	PGSC0003DMG400016493	773.253	303.466	1.3494	0.0013751	0.012562	UP	--	--	GO:0031224//GO:0044425//GO:0016021//GO:0005575//GO:0016020	intrinsic component of membrane//membrane part//integral component of membrane//cellular_component//membrane	--	--	--	--	--	--
357	PGSC0003DMG400016506	58.4601	1.75761	5.0558	0.00069527	0.0072938	UP	--	--	--	--	--	--	no KO assigned | (RefSeq) uncharacterized LOC102579339	http://www.genome.jp/dbget-bin/www_bget?sot:102579339	--	--
358	PGSC0003DMG400016709	915.143	442.04	1.0498	0.00024511	0.003164	UP	GO:0008152//GO:0006793//GO:0071704//GO:0044260//GO:0043412//GO:0008150//GO:0009987//GO:0006796//GO:0044237//GO:0043170//GO:0016310//GO:0006464//GO:0044267//GO:0044238//GO:0006468//GO:0036211//GO:0019538	metabolic process//phosphorus metabolic process//organic substance metabolic process//cellular macromolecule metabolic process//macromolecule modification//biological_process//cellular process//phosphate-containing compound metabolic process//cellular metabolic process//macromolecule metabolic process//phosphorylation//cellular protein modification process//cellular protein metabolic process//pri…	GO:0071944//GO:0016020//GO:0005886//GO:0005575//GO:0044425//GO:0016021//GO:0005623//GO:0044464//GO:0031224	cell periphery//membrane//plasma membrane//cellular_component//membrane part//integral component of membrane//cell//cell part//intrinsic component of membrane	GO:0016301//GO:0032553//GO:0005524//GO:0035639//GO:0032555//GO:0032550//GO:0043167//GO:0003674//GO:0036094//GO:1901363//GO:0030554//GO:0003824//GO:0016740//GO:0097159//GO:0043168//GO:0005488//GO:0032559//GO:0032549//GO:0097367//GO:1901265//GO:0017076//GO:0000166//GO:0001883//GO:0004672//GO:0001882//GO:0016772//GO:0016773	kinase activity//ribonucleotide binding//ATP binding//purine ribonucleoside triphosphate binding//purine ribonucleotide binding//purine ribonucleoside binding//ion binding//molecular_function//small molecule binding//heterocyclic compound binding//adenyl nucleotide binding//catalytic activity//transferase activity//organic cyclic compound binding//anion binding//binding//adenyl ribonucleotide bin…	no KO assigned | (RefSeq) protein STRUBBELIG-RECEPTOR FAMILY 8	http://www.genome.jp/dbget-bin/www_bget?sot:102581192	SRF8	Protein kinase domain||Leucine-rich repeat-containing N-terminal, plant-type||Leucine-rich repeat||Leucine-rich repeat domain, L domain-like||Serine-threonine/tyrosine-protein kinase, catalytic domain||Protein kinase-like domain
359	PGSC0003DMG400016715	535.029	241.234	1.1492	0.0003739	0.0044536	UP	GO:0009664//GO:0009987//GO:0008150//GO:0071669//GO:0045229//GO:0071840//GO:0071555//GO:0071554//GO:0016043	plant-type cell wall organization//cellular process//biological_process//plant-type cell wall organization or biogenesis//external encapsulating structure organization//cellular component organization or biogenesis//cell wall organization//cell wall organization or biogenesis//cellular component organization	GO:0005575//GO:0016020//GO:0071944//GO:0005576//GO:0044464//GO:0005618//GO:0005623//GO:0030312	cellular_component//membrane//cell periphery//extracellular region//cell part//cell wall//cell//external encapsulating structure	--	--	no KO assigned | (RefSeq) EXPA6; expansin-A13	http://www.genome.jp/dbget-bin/www_bget?sot:102577708	-	Expansin/pollen allergen, DPBB domain||RlpA-like protein, double-psi beta-barrel domain||Expansin/Lol pI||Expansin||Expansin, cellulose-binding-like domain
360	PGSC0003DMG400016721	3408.43	1611.69	1.0805	1.6519e-05	0.00034622	UP	GO:1901617//GO:1901615//GO:0008202//GO:0044108//GO:0006629//GO:0006696//GO:0016128//GO:0044238//GO:0009058//GO:0044107//GO:0044237//GO:0016129//GO:1901360//GO:1902652//GO:0044255//GO:0046165//GO:0016126//GO:0006694//GO:0044283//GO:0008150//GO:0044249//GO:1902653//GO:1901362//GO:0044281//GO:0009987//GO:0008610//GO:0097384//GO:0008152//GO:0016125//GO:0008204//GO:0071704//GO:1901576//GO:0006066	organic hydroxy compound biosynthetic process//organic hydroxy compound metabolic process//steroid metabolic process//cellular alcohol biosynthetic process//lipid metabolic process//ergosterol biosynthetic process//phytosteroid metabolic process//primary metabolic process//biosynthetic process//cellular alcohol metabolic process//cellular metabolic process//phytosteroid biosynthetic process//orga…	--	--	GO:0004310//GO:0016765//GO:0051996//GO:0003824//GO:0016740//GO:0004311//GO:0004659//GO:0003674	farnesyl-diphosphate farnesyltransferase activity//transferase activity, transferring alkyl or aryl (other than methyl) groups//squalene synthase activity//catalytic activity//transferase activity//farnesyltranstransferase activity//prenyltransferase activity//molecular_function	K02291 15-cis-phytoene/all-trans-phytoene synthase [EC:2.5.1.32 2.5.1.99] | (RefSeq) phytoene synthase 2, chloroplastic	http://www.genome.jp/dbget-bin/www_bget?sot:102589336	-	Squalene/phytoene synthase, conserved site||Squalene/phytoene synthase||Isoprenoid synthase domain||Trans-Isoprenyl Diphosphate Synthases, head-to-head
361	PGSC0003DMG400016723	289.06	50.6002	2.5142	8.0025e-05	0.0012854	UP	GO:0008152//GO:0008150	metabolic process//biological_process	--	--	GO:0003674//GO:0003824	molecular_function//catalytic activity	no KO assigned | (RefSeq) butyrate--CoA ligase AAE11, peroxisomal-like	http://www.genome.jp/dbget-bin/www_bget?sot:102590201	-	AMP-dependent synthetase/ligase||AMP-binding, conserved site
362	PGSC0003DMG400016733	309.783	46.0213	2.7509	1.0967e-05	0.000247	UP	GO:0008152//GO:0008150	metabolic process//biological_process	--	--	GO:0003674//GO:0003824	molecular_function//catalytic activity	no KO assigned | (RefSeq) butyrate--CoA ligase AAE11, peroxisomal-like	http://www.genome.jp/dbget-bin/www_bget?sot:102590201	-	AMP-binding, conserved site||AMP-binding enzyme, C-terminal domain||AMP-dependent synthetase/ligase
363	PGSC0003DMG400016742	2296.84	781.102	1.5561	0.0045038	0.031577	UP	GO:0043170//GO:0006464//GO:0006470//GO:0044237//GO:0044238//GO:0036211//GO:0016311//GO:0019538//GO:0044267//GO:0071704//GO:0044260//GO:0008152//GO:0006793//GO:0009987//GO:0006796//GO:0043412//GO:0008150	macromolecule metabolic process//cellular protein modification process//protein dephosphorylation//cellular metabolic process//primary metabolic process//protein modification process//dephosphorylation//protein metabolic process//cellular protein metabolic process//organic substance metabolic process//cellular macromolecule metabolic process//metabolic process//phosphorus metabolic process//cellu…	--	--	GO:0046872//GO:0005488//GO:0043169//GO:0042578//GO:0043167//GO:0003674//GO:0016791//GO:0016787//GO:0004721//GO:0003824//GO:0016788//GO:0004722	metal ion binding//binding//cation binding//phosphoric ester hydrolase activity//ion binding//molecular_function//phosphatase activity//hydrolase activity//phosphoprotein phosphatase activity//catalytic activity//hydrolase activity, acting on ester bonds//protein serine/threonine phosphatase activity	K14497 protein phosphatase 2C [EC:3.1.3.16] | (RefSeq) protein phosphatase 2C 37-like	http://www.genome.jp/dbget-bin/www_bget?sot:102599348	-	PPM-type phosphatase domain||Protein phosphatase 2C family||PPM-type phosphatase, divalent cation binding
364	PGSC0003DMG400016805	43.9014	4.61601	3.2495	0.0012492	0.011654	UP	--	--	--	--	--	--	no KO assigned | (RefSeq) F-box protein FBW2-like	http://www.genome.jp/dbget-bin/www_bget?sot:102595752	-	Leucine-rich repeat domain, L domain-like
365	PGSC0003DMG400016878	45.5157	2.83311	4.0059	0.0049833	0.034113	UP	--	--	GO:0016020//GO:0005575//GO:0044425//GO:0016021//GO:0031224	membrane//cellular_component//membrane part//integral component of membrane//intrinsic component of membrane	--	--	K20858 calcium uniporter protein, mitochondrial | (RefSeq) calcium uniporter protein 4, mitochondrial	http://www.genome.jp/dbget-bin/www_bget?sot:102596881	-	Coiled-coil domain containing protein 109, C-terminal
366	PGSC0003DMG400016951	5561.76	2407.25	1.2082	4.8639e-07	1.6997e-05	UP	GO:0080090//GO:1901362//GO:0009987//GO:0051171//GO:0019438//GO:0031326//GO:0008150//GO:0006355//GO:2000112//GO:0009889//GO:0050789//GO:0044249//GO:0031323//GO:0006725//GO:0071704//GO:0097659//GO:0034645//GO:0006351//GO:1901576//GO:0044260//GO:2001141//GO:0051252//GO:0008152//GO:1903506//GO:0090304//GO:0044238//GO:0046483//GO:0006807//GO:0009058//GO:0010467//GO:0010556//GO:0060255//GO:0034654//GO:…	regulation of primary metabolic process//organic cyclic compound biosynthetic process//cellular process//regulation of nitrogen compound metabolic process//aromatic compound biosynthetic process//regulation of cellular biosynthetic process//biological_process//regulation of transcription, DNA-templated//regulation of cellular macromolecule biosynthetic process//regulation of biosynthetic process/…	--	--	GO:0097159//GO:0003676//GO:1901363//GO:0043565//GO:0003700//GO:0003674//GO:0003677//GO:0005488	organic cyclic compound binding//nucleic acid binding//heterocyclic compound binding//sequence-specific DNA binding//DNA-binding transcription factor activity//molecular_function//DNA binding//binding	K14431 transcription factor TGA | (RefSeq) transcription factor TGA7	http://www.genome.jp/dbget-bin/www_bget?sot:102589942	-	Basic-leucine zipper domain||Transcription factor TGA like domain
367	PGSC0003DMG400016976	14.9475	0	Inf	0.0050842	0.034662	UP	--	--	--	--	--	--	no KO assigned | (RefSeq) uncharacterized LOC102584218	http://www.genome.jp/dbget-bin/www_bget?sot:102584218	--	--
368	PGSC0003DMG400017142	110.244	31.5134	1.8067	0.0013791	0.012593	UP	GO:0006952//GO:0050896//GO:0006950//GO:0009607//GO:0008150	defense response//response to stimulus//response to stress//response to biotic stimulus//biological_process	--	--	--	--	no KO assigned | (RefSeq) MLP-like protein 34	http://www.genome.jp/dbget-bin/www_bget?sot:102584283	-	Bet v I/Major latex protein||START-like domain
369	PGSC0003DMG400017198	1752.4	518.941	1.7557	1.3996e-09	9.8496e-08	UP	GO:0008152//GO:0015979//GO:0022900//GO:0071478//GO:0009642//GO:0042221//GO:0008150//GO:0001101//GO:0055114//GO:0010035//GO:0071214//GO:0009987//GO:0006950//GO:0044237//GO:0071484//GO:0051716//GO:0009416//GO:0009415//GO:0009314//GO:0071482//GO:0009773//GO:0009767//GO:0019684//GO:0009628//GO:0009414//GO:0050896//GO:0006091//GO:1901700//GO:0009644//GO:0010117	metabolic process//photosynthesis//electron transport chain//cellular response to radiation//response to light intensity//response to chemical//biological_process//response to acid chemical//oxidation-reduction process//response to inorganic substance//cellular response to abiotic stimulus//cellular process//response to stress//cellular metabolic process//cellular response to light intensity//cel…	GO:0009507//GO:0005737//GO:0043231//GO:0005575//GO:0043227//GO:0016020//GO:0031984//GO:0031976//GO:0044436//GO:0009536//GO:0034357//GO:0009579//GO:0043226//GO:0042651//GO:0055035//GO:0044424//GO:0043229//GO:0044446//GO:0044422//GO:0009535//GO:0044435//GO:0044434//GO:0009534//GO:0005623//GO:0044444//GO:0005622//GO:0044464	chloroplast//cytoplasm//intracellular membrane-bounded organelle//cellular_component//membrane-bounded organelle//membrane//organelle subcompartment//plastid thylakoid//thylakoid part//plastid//photosynthetic membrane//thylakoid//organelle//thylakoid membrane//plastid thylakoid membrane//intracellular part//intracellular organelle//intracellular organelle part//organelle part//chloroplast thylako…	GO:0009055//GO:0003674	electron transfer activity//molecular_function	no KO assigned | (RefSeq) protein PROTON GRADIENT REGULATION 5, chloroplastic	http://www.genome.jp/dbget-bin/www_bget?sot:102602963	PGR5	-
370	PGSC0003DMG400017234	31.7639	1.59744	4.3136	0.00086528	0.0087049	UP	GO:0055085//GO:0051179//GO:0009987//GO:0008150//GO:0051234//GO:0006810	transmembrane transport//localization//cellular process//biological_process//establishment of localization//transport	GO:0016021//GO:0044425//GO:0031224//GO:0016020//GO:0005575	integral component of membrane//membrane part//intrinsic component of membrane//membrane//cellular_component	GO:0005215//GO:0003674//GO:0022857	transporter activity//molecular_function//transmembrane transporter activity	no KO assigned | (RefSeq) WAT1-related protein At1g44800-like	http://www.genome.jp/dbget-bin/www_bget?sot:102588716	-	WAT1-related protein||EamA domain
371	PGSC0003DMG400017383	3767.07	1823.94	1.0464	2.3512e-05	0.00046388	UP	--	--	--	--	--	--	no KO assigned | (RefSeq) uncharacterized LOC102604651	http://www.genome.jp/dbget-bin/www_bget?sot:102604651	--	--
372	PGSC0003DMG400017476	37.1425	5.26624	2.8182	0.0063933	0.041016	UP	--	--	GO:0016020//GO:0005575//GO:0044425//GO:0016021//GO:0031224	membrane//cellular_component//membrane part//integral component of membrane//intrinsic component of membrane	--	--	no KO assigned | (RefSeq) uncharacterized LOC102590930	http://www.genome.jp/dbget-bin/www_bget?sot:102590930	--	--
373	PGSC0003DMG400017494	500.05	247.288	1.0159	0.0011947	0.011251	UP	GO:0008104//GO:0070727//GO:0051179//GO:0045184//GO:0006886//GO:0015031//GO:0051641//GO:0071702//GO:0033036//GO:0034613//GO:0051649//GO:0051234//GO:0006810//GO:0008150//GO:0046907	protein localization//cellular macromolecule localization//localization//establishment of protein localization//intracellular protein transport//protein transport//cellular localization//organic substance transport//macromolecule localization//cellular protein localization//establishment of localization in cell//establishment of localization//transport//biological_process//intracellular transport	GO:0044424//GO:0044425//GO:0016021//GO:0043229//GO:0044444//GO:0005623//GO:0005622//GO:0044464//GO:0031224//GO:0012505//GO:0005737//GO:0005575//GO:0043231//GO:0016020//GO:0043227//GO:0005783//GO:0043226	intracellular part//membrane part//integral component of membrane//intracellular organelle//cytoplasmic part//cell//intracellular//cell part//intrinsic component of membrane//endomembrane system//cytoplasm//cellular_component//intracellular membrane-bounded organelle//membrane//membrane-bounded organelle//endoplasmic reticulum//organelle	--	--	K14009 B-cell receptor-associated protein 31 | (RefSeq) uncharacterized LOC102593622	http://www.genome.jp/dbget-bin/www_bget?sot:102593622	-	B-cell receptor-associated protein 29/31
374	PGSC0003DMG400017620	306.266	136.94	1.1612	0.001271	0.011827	UP	GO:0051179//GO:0008150//GO:0051234//GO:0006810	localization//biological_process//establishment of localization//transport	GO:0031224//GO:0016021//GO:0044425//GO:0016020//GO:0005575	intrinsic component of membrane//integral component of membrane//membrane part//membrane//cellular_component	GO:0005215//GO:0003674	transporter activity//molecular_function	K14638 solute carrier family 15 (peptide/histidine transporter), member 3/4 | (RefSeq) protein NRT1/ PTR FAMILY 4.6-like	http://www.genome.jp/dbget-bin/www_bget?sot:102597986	-	Proton-dependent oligopeptide transporter family||Major facilitator superfamily domain
375	PGSC0003DMG400017756	267.711	29.2836	3.1925	1.8054e-05	0.00037446	UP	--	--	--	--	--	--	--	--	--	--
376	PGSC0003DMG400017758	127.011	34.3256	1.8876	0.00022089	0.0029116	UP	--	--	--	--	--	--	--	--	--	--
377	PGSC0003DMG400017769	47.6715	0.979604	5.6048	0.00016108	0.0022607	UP	--	--	--	--	--	--	--	--	--	--
378	PGSC0003DMG400017772	150.803	45.8795	1.7167	0.00085544	0.0086233	UP	--	--	--	--	--	--	--	--	--	--
379	PGSC0003DMG400017778	219.952	79.7399	1.4638	0.00057494	0.0062644	UP	--	--	GO:0044425//GO:0016021//GO:0031224//GO:0005575//GO:0016020	membrane part//integral component of membrane//intrinsic component of membrane//cellular_component//membrane	--	--	no KO assigned | (RefSeq) uncharacterized LOC102578315	http://www.genome.jp/dbget-bin/www_bget?sot:102578315	--	--
380	PGSC0003DMG400017833	46.6423	8.72712	2.4181	0.0051447	0.034947	UP	GO:0008150//GO:0055114//GO:0008152	biological_process//oxidation-reduction process//metabolic process	--	--	GO:0016491//GO:0003824//GO:0003674	oxidoreductase activity//catalytic activity//molecular_function	K12259 spermine oxidase [EC:1.5.3.16 1.5.3.-] | (RefSeq) probable polyamine oxidase 5	http://www.genome.jp/dbget-bin/www_bget?sot:102597076	-	Amine oxidase||FAD/NAD(P)-binding domain
381	PGSC0003DMG400017875	408.412	183.026	1.158	0.00049105	0.0055276	UP	--	--	--	--	--	--	no KO assigned | (RefSeq) tetratricopeptide repeat protein 5-like	http://www.genome.jp/dbget-bin/www_bget?sot:102606411	-	Tetratricopeptide repeat protein 5, OB fold domain
382	PGSC0003DMG400018045	74.3695	19.3805	1.9401	0.0052743	0.035642	UP	--	--	GO:0044425//GO:0016021//GO:0031224//GO:0016020//GO:0005575	membrane part//integral component of membrane//intrinsic component of membrane//membrane//cellular_component	--	--	no KO assigned | (RefSeq) receptor-like protein 12	http://www.genome.jp/dbget-bin/www_bget?sot:102589525	-	Leucine-rich repeat-containing N-terminal, plant-type||Leucine-rich repeat||Leucine-rich repeat, typical subtype||Leucine-rich repeat domain, L domain-like
383	PGSC0003DMG400018063	36.5311	4.3664	3.0646	0.0053831	0.036115	UP	GO:0008152//GO:0008150	metabolic process//biological_process	--	--	GO:0016757//GO:0003674//GO:0003824//GO:0016740//GO:0016758	transferase activity, transferring glycosyl groups//molecular_function//catalytic activity//transferase activity//transferase activity, transferring hexosyl groups	K21374 7-deoxyloganetin glucosyltransferase [EC:2.4.1.324] | (RefSeq) 7-deoxyloganetin glucosyltransferase-like	http://www.genome.jp/dbget-bin/www_bget?sot:102579965	-	UDP-glucuronosyl/UDP-glucosyltransferase
384	PGSC0003DMG400018094	13108	6465.61	1.0196	0.00011993	0.0017758	UP	GO:0009987//GO:0044249//GO:1901566//GO:0008150//GO:1901564//GO:0034645//GO:0071704//GO:0006518//GO:1901576//GO:0044260//GO:0043604//GO:0008152//GO:0044238//GO:0006412//GO:0010467//GO:0043603//GO:0006807//GO:0019538//GO:0009058//GO:0044267//GO:0034641//GO:0043170//GO:0009059//GO:0044237//GO:0044271//GO:0043043	cellular process//cellular biosynthetic process//organonitrogen compound biosynthetic process//biological_process//organonitrogen compound metabolic process//cellular macromolecule biosynthetic process//organic substance metabolic process//peptide metabolic process//organic substance biosynthetic process//cellular macromolecule metabolic process//amide biosynthetic process//metabolic process//pri…	GO:0043226//GO:0032991//GO:0005575//GO:0005737//GO:0005840//GO:0044464//GO:0005622//GO:0044444//GO:0005623//GO:0043228//GO:0043229//GO:0044424//GO:0043232	organelle//protein-containing complex//cellular_component//cytoplasm//ribosome//cell part//intracellular//cytoplasmic part//cell//non-membrane-bounded organelle//intracellular organelle//intracellular part//intracellular non-membrane-bounded organelle	GO:0005198//GO:0003735//GO:0003674	structural molecule activity//structural constituent of ribosome//molecular_function	K02929 large subunit ribosomal protein L44e | (RefSeq) 60S ribosomal protein L44-like	http://www.genome.jp/dbget-bin/www_bget?sot:102592650	-	Ribosomal protein L44e||Zinc-binding ribosomal protein
385	PGSC0003DMG400018103	979.731	178.354	2.4576	0.0065327	0.041659	UP	--	--	--	--	--	--	no KO assigned | (RefSeq) uncharacterized LOC102598928	http://www.genome.jp/dbget-bin/www_bget?sot:102598928	-	Neprosin||Neprosin activation peptide
386	PGSC0003DMG400018115	1290.27	587.489	1.135	0.00050901	0.005687	UP	--	--	--	--	--	--	no KO assigned | (RefSeq) uncharacterized LOC102580365	http://www.genome.jp/dbget-bin/www_bget?sot:102580365	-	PB1 domain
387	PGSC0003DMG400018171	256.467	89.7927	1.5141	0.0071912	0.04479	UP	GO:0044260//GO:0071704//GO:0006793//GO:0008152//GO:0006796//GO:0009987//GO:0008150//GO:0043412//GO:0006464//GO:0043170//GO:0016310//GO:0044237//GO:0019538//GO:0006468//GO:0044238//GO:0036211//GO:0044267	cellular macromolecule metabolic process//organic substance metabolic process//phosphorus metabolic process//metabolic process//phosphate-containing compound metabolic process//cellular process//biological_process//macromolecule modification//cellular protein modification process//macromolecule metabolic process//phosphorylation//cellular metabolic process//protein metabolic process//protein phos…	GO:0005575//GO:0016020//GO:0016021//GO:0044425//GO:0031224	cellular_component//membrane//integral component of membrane//membrane part//intrinsic component of membrane	GO:0003674//GO:0036094//GO:0043167//GO:0035639//GO:0032555//GO:0032550//GO:0016301//GO:0032553//GO:0005524//GO:0097159//GO:0016740//GO:1901363//GO:0003824//GO:0030554//GO:0017076//GO:0097367//GO:1901265//GO:0005488//GO:0032549//GO:0032559//GO:0043168//GO:0016773//GO:0004674//GO:0004672//GO:0001882//GO:0016772//GO:0000166//GO:0001883	molecular_function//small molecule binding//ion binding//purine ribonucleoside triphosphate binding//purine ribonucleotide binding//purine ribonucleoside binding//kinase activity//ribonucleotide binding//ATP binding//organic cyclic compound binding//transferase activity//heterocyclic compound binding//catalytic activity//adenyl nucleotide binding//purine nucleotide binding//carbohydrate derivativ…	no KO assigned | (RefSeq) probable LRR receptor-like serine/threonine-protein kinase At4g26540	http://www.genome.jp/dbget-bin/www_bget?sot:102600451	-	Protein kinase domain||Leucine-rich repeat-containing N-terminal, plant-type||Serine/threonine-protein kinase, active site||Leucine-rich repeat domain, L domain-like||Leucine-rich repeat, typical subtype||Leucine rich repeat 4||Leucine-rich repeat||Protein kinase, ATP binding site||Protein kinase-like domain||Serine-threonine/tyrosine-protein kinase, catalytic domain
388	PGSC0003DMG400018186	209.607	95.2348	1.1381	0.0071572	0.044634	UP	--	--	--	--	--	--	no KO assigned | (RefSeq) uncharacterized LOC102582940	http://www.genome.jp/dbget-bin/www_bget?sot:102582940	--	--
389	PGSC0003DMG400018241	541.909	115.137	2.2347	0.0034834	0.025907	UP	--	--	GO:0016020//GO:0005575//GO:0044425//GO:0016021//GO:0031224	membrane//cellular_component//membrane part//integral component of membrane//intrinsic component of membrane	--	--	K03358 anaphase-promoting complex subunit 11 | (RefSeq) anaphase-promoting complex subunit 11	http://www.genome.jp/dbget-bin/www_bget?sot:102594702	-	Proteolipid membrane potential modulator
390	PGSC0003DMG400018401	196.206	41.7091	2.2339	2.951e-06	7.9802e-05	UP	--	--	--	--	--	--	--	--	--	--
391	PGSC0003DMG400018419	67.0459	12.9747	2.3695	0.0015818	0.014059	UP	--	--	--	--	--	--	--	--	--	--
392	PGSC0003DMG400018426	1741.76	661.943	1.3958	2.2825e-07	8.7523e-06	UP	GO:1901576//GO:0044260//GO:2001141//GO:0071704//GO:0097659//GO:0006351//GO:0034645//GO:0006725//GO:1903506//GO:0051252//GO:0008152//GO:0051171//GO:0009987//GO:0080090//GO:1901362//GO:0009889//GO:0050789//GO:0031323//GO:0044249//GO:0031326//GO:0008150//GO:0006355//GO:2000112//GO:0019438//GO:0019219//GO:0009059//GO:0043170//GO:0019222//GO:0006139//GO:1901360//GO:0044271//GO:0044237//GO:0010467//GO:…	organic substance biosynthetic process//cellular macromolecule metabolic process//regulation of RNA biosynthetic process//organic substance metabolic process//nucleic acid-templated transcription//transcription, DNA-templated//cellular macromolecule biosynthetic process//cellular aromatic compound metabolic process//regulation of nucleic acid-templated transcription//regulation of RNA metabolic p…	GO:0005575//GO:0043231//GO:0043227//GO:0043226//GO:0043229//GO:0044424//GO:0005622//GO:0005634//GO:0044464//GO:0005623	cellular_component//intracellular membrane-bounded organelle//membrane-bounded organelle//organelle//intracellular organelle//intracellular part//intracellular//nucleus//cell part//cell	GO:0003674//GO:0097159//GO:0003676//GO:1901363//GO:0005488//GO:0003677	molecular_function//organic cyclic compound binding//nucleic acid binding//heterocyclic compound binding//binding//DNA binding	no KO assigned | (RefSeq) uncharacterized LOC102602966	http://www.genome.jp/dbget-bin/www_bget?sot:102602966	-	Myb domain, plants||MYB-CC type transcription factor, LHEQLE-containing domain||Myb domain||SANT/Myb domain||Homeobox domain-like
393	PGSC0003DMG400018457	68.3791	11.5984	2.5596	0.00064982	0.0069092	UP	GO:0044260//GO:0044706//GO:0071704//GO:0006793//GO:0008152//GO:0008037//GO:0006796//GO:0048544//GO:0009987//GO:0008150//GO:0009856//GO:0043412//GO:0051704//GO:0006464//GO:0016310//GO:0032501//GO:0009875//GO:0022414//GO:0044703//GO:0007154//GO:0043170//GO:0044237//GO:0019538//GO:0036211//GO:0006468//GO:0044238//GO:0044267	cellular macromolecule metabolic process//multi-multicellular organism process//organic substance metabolic process//phosphorus metabolic process//metabolic process//cell recognition//phosphate-containing compound metabolic process//recognition of pollen//cellular process//biological_process//pollination//macromolecule modification//multi-organism process//cellular protein modification process//p…	GO:0005575//GO:0016020//GO:0016021//GO:0044425//GO:0031224	cellular_component//membrane//integral component of membrane//membrane part//intrinsic component of membrane	GO:0036094//GO:0003674//GO:0043167//GO:0032550//GO:0032555//GO:0035639//GO:0005524//GO:0032553//GO:0016301//GO:0097159//GO:0016740//GO:0003824//GO:0030554//GO:1901363//GO:0017076//GO:1901265//GO:0097367//GO:0032549//GO:0032559//GO:0005488//GO:0043168//GO:0016773//GO:0004674//GO:0016772//GO:0001882//GO:0004672//GO:0001883//GO:0000166	small molecule binding//molecular_function//ion binding//purine ribonucleoside binding//purine ribonucleotide binding//purine ribonucleoside triphosphate binding//ATP binding//ribonucleotide binding//kinase activity//organic cyclic compound binding//transferase activity//catalytic activity//adenyl nucleotide binding//heterocyclic compound binding//purine nucleotide binding//nucleoside phosphate b…	K04733 interleukin-1 receptor-associated kinase 4 [EC:2.7.11.1] | (RefSeq) G-type lectin S-receptor-like serine/threonine-protein kinase RLK1	http://www.genome.jp/dbget-bin/www_bget?sot:102594030	-	S-receptor-like serine/threonine-protein kinase||Protein kinase-like domain||Protein kinase domain||Bulb-type lectin domain||S-locus glycoprotein domain
394	PGSC0003DMG400018459	119.605	36.1519	1.7261	0.0013944	0.012706	UP	GO:0055085//GO:0006811//GO:0015711//GO:0015849//GO:0098656//GO:1903825//GO:0051179//GO:0006865//GO:0006820//GO:0046942//GO:0071702//GO:0034220//GO:0003333//GO:0008150//GO:0051234//GO:0006810//GO:0071705//GO:0009987	transmembrane transport//ion transport//organic anion transport//organic acid transport//anion transmembrane transport//organic acid transmembrane transport//localization//amino acid transport//anion transport//carboxylic acid transport//organic substance transport//ion transmembrane transport//amino acid transmembrane transport//biological_process//establishment of localization//transport//nitro…	GO:0044425//GO:0016021//GO:0031224//GO:0005575//GO:0016020	membrane part//integral component of membrane//intrinsic component of membrane//cellular_component//membrane	GO:0005342//GO:0015075//GO:0005215//GO:0008514//GO:0008509//GO:0003674//GO:0015171//GO:0022857//GO:0046943	organic acid transmembrane transporter activity//ion transmembrane transporter activity//transporter activity//organic anion transmembrane transporter activity//anion transmembrane transporter activity//molecular_function//amino acid transmembrane transporter activity//transmembrane transporter activity//carboxylic acid transmembrane transporter activity	no KO assigned | (RefSeq) probable polyamine transporter At1g31830	http://www.genome.jp/dbget-bin/www_bget?sot:102602998	-	Amino acid/polyamine transporter I
395	PGSC0003DMG400018611	201.093	84.6114	1.2489	0.0023511	0.019176	UP	GO:0043412//GO:0009100//GO:0044249//GO:0008150//GO:0009987//GO:0070085//GO:0008152//GO:1901137//GO:0071704//GO:0034645//GO:0006486//GO:0005975//GO:0044260//GO:1901576//GO:1901135//GO:0044267//GO:0043413//GO:0009101//GO:0036211//GO:0044238//GO:0009058//GO:0019538//GO:0044237//GO:0043170//GO:0006487//GO:0006464//GO:0009059	macromolecule modification//glycoprotein metabolic process//cellular biosynthetic process//biological_process//cellular process//glycosylation//metabolic process//carbohydrate derivative biosynthetic process//organic substance metabolic process//cellular macromolecule biosynthetic process//protein glycosylation//carbohydrate metabolic process//cellular macromolecule metabolic process//organic sub…	GO:0016020//GO:0005575//GO:0031224//GO:0044425//GO:0016021	membrane//cellular_component//intrinsic component of membrane//membrane part//integral component of membrane	GO:0003824//GO:0008194//GO:0016740//GO:0016757//GO:0003674//GO:0008375//GO:0003830//GO:0016758	catalytic activity//UDP-glycosyltransferase activity//transferase activity//transferase activity, transferring glycosyl groups//molecular_function//acetylglucosaminyltransferase activity//beta-1,4-mannosylglycoprotein 4-beta-N-acetylglucosaminyltransferase activity//transferase activity, transferring hexosyl groups	K00737 beta-1,4-mannosyl-glycoprotein beta-1,4-N-acetylglucosaminyltransferase [EC:2.4.1.144] | (RefSeq) uncharacterized LOC102580443	http://www.genome.jp/dbget-bin/www_bget?sot:102580443	-	Glycosyl transferase, family 17
396	PGSC0003DMG400018659	258.908	112.016	1.2087	0.0016778	0.014704	UP	GO:0008150//GO:0055114//GO:0008152	biological_process//oxidation-reduction process//metabolic process	--	--	GO:0016705//GO:0000166//GO:0050661//GO:0005488//GO:0004497//GO:0004499//GO:0043168//GO:0048037//GO:1901265//GO:0016491//GO:1901363//GO:0003824//GO:0050660//GO:0050662//GO:0097159//GO:0016709//GO:0003674//GO:0036094//GO:0043167	oxidoreductase activity, acting on paired donors, with incorporation or reduction of molecular oxygen//nucleotide binding//NADP binding//binding//monooxygenase activity//N,N-dimethylaniline monooxygenase activity//anion binding//cofactor binding//nucleoside phosphate binding//oxidoreductase activity//heterocyclic compound binding//catalytic activity//flavin adenine dinucleotide binding//coenzyme …	K00485 dimethylaniline monooxygenase (N-oxide forming) [EC:1.14.13.8] | (RefSeq) probable flavin-containing monooxygenase 1	http://www.genome.jp/dbget-bin/www_bget?sot:102580947	-	Flavin monooxygenase-like||FAD/NAD(P)-binding domain
397	PGSC0003DMG400018685	33481.2	14109.1	1.2467	1.1044e-07	4.6986e-06	UP	--	--	GO:0043226//GO:0043227//GO:0005575//GO:0043231//GO:0005623//GO:0044464//GO:0005622//GO:0005634//GO:0044424//GO:0043229	organelle//membrane-bounded organelle//cellular_component//intracellular membrane-bounded organelle//cell//cell part//intracellular//nucleus//intracellular part//intracellular organelle	GO:0003676//GO:1901363//GO:0097159//GO:0003674//GO:0003677//GO:0005488	nucleic acid binding//heterocyclic compound binding//organic cyclic compound binding//molecular_function//DNA binding//binding	K10802 high mobility group protein B1 | (RefSeq) HMG1/2-like protein	http://www.genome.jp/dbget-bin/www_bget?sot:102604023	-	High mobility group box domain
398	PGSC0003DMG400018690	63.1048	13.0967	2.2685	0.0020897	0.017496	UP	--	--	--	--	--	--	--	--	--	--
399	PGSC0003DMG400018849	251.772	7.37853	5.0926	0.0022595	0.018607	UP	GO:0044260//GO:0071704//GO:0006793//GO:0008152//GO:0006796//GO:0009987//GO:0008150//GO:0043412//GO:0006464//GO:0043170//GO:0016310//GO:0044237//GO:0019538//GO:0036211//GO:0006468//GO:0044238//GO:0044267	cellular macromolecule metabolic process//organic substance metabolic process//phosphorus metabolic process//metabolic process//phosphate-containing compound metabolic process//cellular process//biological_process//macromolecule modification//cellular protein modification process//macromolecule metabolic process//phosphorylation//cellular metabolic process//protein metabolic process//protein modi…	GO:0005575//GO:0016020//GO:0016021//GO:0044425//GO:0031224	cellular_component//membrane//integral component of membrane//membrane part//intrinsic component of membrane	GO:0036094//GO:0003674//GO:0043167//GO:0032555//GO:0035639//GO:0032550//GO:0016301//GO:0005524//GO:0032553//GO:0097159//GO:0016740//GO:1901363//GO:0003824//GO:0030554//GO:0017076//GO:0097367//GO:1901265//GO:0005488//GO:0032549//GO:0032559//GO:0043168//GO:0016773//GO:0004674//GO:0004672//GO:0016772//GO:0001882//GO:0000166//GO:0001883	small molecule binding//molecular_function//ion binding//purine ribonucleotide binding//purine ribonucleoside triphosphate binding//purine ribonucleoside binding//kinase activity//ATP binding//ribonucleotide binding//organic cyclic compound binding//transferase activity//heterocyclic compound binding//catalytic activity//adenyl nucleotide binding//purine nucleotide binding//carbohydrate derivativ…	no KO assigned | (RefSeq) leucine-rich repeat receptor-like protein kinase TDR	http://www.genome.jp/dbget-bin/www_bget?sot:102593180	-	Protein kinase-like domain||Serine-threonine/tyrosine-protein kinase, catalytic domain||Serine/threonine-protein kinase, active site||Leucine-rich repeat, typical subtype||Leucine-rich repeat domain, L domain-like||Protein kinase, ATP binding site||Leucine-rich repeat||Protein kinase domain||Leucine-rich repeat-containing N-terminal, plant-type
400	PGSC0003DMG400018992	57.3316	11.0414	2.3764	0.0027321	0.021524	UP	--	--	--	--	--	--	K20606 mitogen-activated protein kinase kinase kinase ANP1 [EC:2.7.11.25] | (RefSeq) mitogen-activated protein kinase kinase kinase NPK1-like	http://www.genome.jp/dbget-bin/www_bget?sot:102597923	--	--
401	PGSC0003DMG400019129	121.074	14.3893	3.0728	8.6392e-07	2.7964e-05	UP	GO:0051171//GO:0009987//GO:0080090//GO:1901362//GO:0019438//GO:0009889//GO:0031323//GO:0044249//GO:0050789//GO:0006355//GO:0031326//GO:0008150//GO:2000112//GO:0006351//GO:0034645//GO:0071704//GO:0097659//GO:0006725//GO:2001141//GO:1901576//GO:0044260//GO:0051252//GO:0008152//GO:1903506//GO:0046483//GO:0044238//GO:0090304//GO:0010467//GO:0006807//GO:0009058//GO:0018130//GO:0050794//GO:0034654//GO:…	regulation of nitrogen compound metabolic process//cellular process//regulation of primary metabolic process//organic cyclic compound biosynthetic process//aromatic compound biosynthetic process//regulation of biosynthetic process//regulation of cellular metabolic process//cellular biosynthetic process//regulation of biological process//regulation of transcription, DNA-templated//regulation of ce…	GO:0043226//GO:0043227//GO:0005575//GO:0043231//GO:0044464//GO:0005622//GO:0005634//GO:0005623//GO:0043229//GO:0044424	organelle//membrane-bounded organelle//cellular_component//intracellular membrane-bounded organelle//cell part//intracellular//nucleus//cell//intracellular organelle//intracellular part	GO:0097159//GO:0003676//GO:1901363//GO:0003674//GO:0003677//GO:0005488	organic cyclic compound binding//nucleic acid binding//heterocyclic compound binding//molecular_function//DNA binding//binding	no KO assigned | (RefSeq) transcription factor DIVARICATA-like	http://www.genome.jp/dbget-bin/www_bget?sot:102588148	-	Myb domain, plants||Myb-like domain||SANT/Myb domain||Homeobox domain-like||Myb domain
402	PGSC0003DMG400019155	250.582	56.0985	2.1592	3.1205e-05	0.00058312	UP	GO:0009059//GO:0019219//GO:0043170//GO:0019222//GO:0044271//GO:0006139//GO:1901360//GO:0044237//GO:0010467//GO:0009058//GO:0006807//GO:0044238//GO:0046483//GO:0090304//GO:0016070//GO:0034641//GO:0010468//GO:0032774//GO:0065007//GO:0050794//GO:0018130//GO:0010556//GO:0060255//GO:0034654//GO:1901576//GO:0044260//GO:2001141//GO:0071704//GO:0097659//GO:0034645//GO:0006351//GO:0006725//GO:1903506//GO:…	macromolecule biosynthetic process//regulation of nucleobase-containing compound metabolic process//macromolecule metabolic process//regulation of metabolic process//cellular nitrogen compound biosynthetic process//nucleobase-containing compound metabolic process//organic cyclic compound metabolic process//cellular metabolic process//gene expression//biosynthetic process//nitrogen compound metabo…	GO:0043229//GO:0044424//GO:0005634//GO:0005622//GO:0044464//GO:0005623//GO:0043231//GO:0005575//GO:0043227//GO:0043226	intracellular organelle//intracellular part//nucleus//intracellular//cell part//cell//intracellular membrane-bounded organelle//cellular_component//membrane-bounded organelle//organelle	GO:0005488//GO:0003677//GO:0003674//GO:0097159//GO:1901363//GO:0003676	binding//DNA binding//molecular_function//organic cyclic compound binding//heterocyclic compound binding//nucleic acid binding	no KO assigned | (RefSeq) dof zinc finger protein DOF2.4-like	http://www.genome.jp/dbget-bin/www_bget?sot:102602609	-	Zinc finger, Dof-type
403	PGSC0003DMG400019180	377.382	185.421	1.0252	0.0080805	0.048765	UP	--	--	--	--	--	--	no KO assigned | (RefSeq) GDSL esterase/lipase CPRD49-like	http://www.genome.jp/dbget-bin/www_bget?sot:102584408	-	SGNH hydrolase-type esterase domain
404	PGSC0003DMG400019188	4037.79	1913.9	1.077	0.006076	0.03948	UP	GO:0044238//GO:0016311//GO:0044237//GO:0009987//GO:0006796//GO:0008150//GO:0071704//GO:0005975//GO:0008152//GO:0006793	primary metabolic process//dephosphorylation//cellular metabolic process//cellular process//phosphate-containing compound metabolic process//biological_process//organic substance metabolic process//carbohydrate metabolic process//metabolic process//phosphorus metabolic process	--	--	GO:0042578//GO:0003824//GO:0019203//GO:0016788//GO:0050308//GO:0016791//GO:0003674//GO:0016787//GO:0042132	phosphoric ester hydrolase activity//catalytic activity//carbohydrate phosphatase activity//hydrolase activity, acting on ester bonds//sugar-phosphatase activity//phosphatase activity//molecular_function//hydrolase activity//fructose 1,6-bisphosphate 1-phosphatase activity	K03841 fructose-1,6-bisphosphatase I [EC:3.1.3.11] | (RefSeq) fructose-1,6-bisphosphatase, chloroplastic-like	http://www.genome.jp/dbget-bin/www_bget?sot:102590424	-	Fructose-1-6-bisphosphatase class I, N-terminal||Fructose-1,6-bisphosphatase class 1||Fructose-1,6-bisphosphatase
405	PGSC0003DMG400019285	160.341	40.4619	1.9865	3.8463e-05	0.00068969	UP	--	--	--	--	--	--	no KO assigned | (RefSeq) uncharacterized LOC102585998	http://www.genome.jp/dbget-bin/www_bget?sot:102585998	-	Protein of unknown function DUF761, plant||Domain of unknown function DUF4408
406	PGSC0003DMG400019515	346.97	154.992	1.1626	0.0063001	0.040522	UP	GO:0065003//GO:0071103//GO:0044085//GO:0043933//GO:0034728//GO:0071840//GO:0022607//GO:0006996//GO:0016043//GO:0031497//GO:0006325//GO:0006333//GO:0006323//GO:0034622//GO:0065004//GO:0008150//GO:0009987//GO:0051276//GO:0006334//GO:0070271//GO:0071824	protein-containing complex assembly//DNA conformation change//cellular component biogenesis//protein-containing complex subunit organization//nucleosome organization//cellular component organization or biogenesis//cellular component assembly//organelle organization//cellular component organization//chromatin assembly//chromatin organization//chromatin assembly or disassembly//DNA packaging//cellu…	GO:0005623//GO:0005634//GO:0005622//GO:0044464//GO:0044424//GO:0043229//GO:0043226//GO:0043231//GO:0005575//GO:0043227	cell//nucleus//intracellular//cell part//intracellular part//intracellular organelle//organelle//intracellular membrane-bounded organelle//cellular_component//membrane-bounded organelle	--	--	K11290 template-activating factor I | (RefSeq) NAP1-related protein 2	http://www.genome.jp/dbget-bin/www_bget?sot:102603143	-	Nucleosome assembly protein (NAP)
407	PGSC0003DMG400019527	542.66	230.168	1.2374	0.00043797	0.0050382	UP	--	--	--	--	GO:0005488//GO:0046872//GO:0043169//GO:0005509//GO:0043167//GO:0003674	binding//metal ion binding//cation binding//calcium ion binding//ion binding//molecular_function	K02183 calmodulin | (RefSeq) probable calcium-binding protein CML30	http://www.genome.jp/dbget-bin/www_bget?sot:102602408	-	EF-Hand 1, calcium-binding site||EF-hand domain||EF-hand domain pair
408	PGSC0003DMG400019646	39.5889	0.614608	6.0093	0.0016852	0.014747	UP	--	--	--	--	--	--	no KO assigned | (RefSeq) alpha/beta hydrolase domain-containing protein 17C-like	http://www.genome.jp/dbget-bin/www_bget?sot:102578883	-	Serine aminopeptidase, S33||Alpha/Beta hydrolase fold
409	PGSC0003DMG400019671	1035.86	260.533	1.9913	8.577e-12	9.754e-10	UP	GO:0008152//GO:0042592//GO:0065008//GO:0050789//GO:0008150//GO:0009987//GO:0045454//GO:0019725//GO:0055114//GO:0050794//GO:0065007	metabolic process//homeostatic process//regulation of biological quality//regulation of biological process//biological_process//cellular process//cell redox homeostasis//cellular homeostasis//oxidation-reduction process//regulation of cellular process//biological regulation	GO:0005575//GO:0005623	cellular_component//cell	GO:0009055//GO:0003674//GO:0003824//GO:0016491//GO:0015035//GO:0015036//GO:0016667	electron transfer activity//molecular_function//catalytic activity//oxidoreductase activity//protein disulfide oxidoreductase activity//disulfide oxidoreductase activity//oxidoreductase activity, acting on a sulfur group of donors	no KO assigned | (RefSeq) glutaredoxin-C6-like	http://www.genome.jp/dbget-bin/www_bget?sot:102605242	-	Glutaredoxin||Thioredoxin-like fold||Glutaredoxin-like, plant II
410	PGSC0003DMG400019721	441.101	166.628	1.4045	2.4645e-05	0.00048171	UP	GO:0006793//GO:0008152//GO:0044260//GO:0071704//GO:0008150//GO:0043412//GO:0006796//GO:0009987//GO:0044237//GO:0006464//GO:0043170//GO:0016310//GO:0044267//GO:0019538//GO:0036211//GO:0006468//GO:0044238	phosphorus metabolic process//metabolic process//cellular macromolecule metabolic process//organic substance metabolic process//biological_process//macromolecule modification//phosphate-containing compound metabolic process//cellular process//cellular metabolic process//cellular protein modification process//macromolecule metabolic process//phosphorylation//cellular protein metabolic process//pro…	--	--	GO:0032555//GO:0035639//GO:0032550//GO:0016301//GO:0005524//GO:0032553//GO:0036094//GO:0003674//GO:0043167//GO:0016740//GO:1901363//GO:0030554//GO:0003824//GO:0097159//GO:0005488//GO:0032559//GO:0032549//GO:0043168//GO:0017076//GO:0097367//GO:1901265//GO:0004672//GO:0016772//GO:0001882//GO:0000166//GO:0001883//GO:0016773//GO:0004674	purine ribonucleotide binding//purine ribonucleoside triphosphate binding//purine ribonucleoside binding//kinase activity//ATP binding//ribonucleotide binding//small molecule binding//molecular_function//ion binding//transferase activity//heterocyclic compound binding//adenyl nucleotide binding//catalytic activity//organic cyclic compound binding//binding//adenyl ribonucleotide binding//ribonucle…	no KO assigned | (RefSeq) probable receptor-like protein kinase At5g39020	http://www.genome.jp/dbget-bin/www_bget?sot:102605075	-	Protein kinase-like domain||Protein kinase, ATP binding site||Protein kinase domain||Serine/threonine-protein kinase, active site
411	PGSC0003DMG400019725	1724.66	546.04	1.6592	4.1812e-10	3.3171e-08	UP	GO:0006464//GO:0016310//GO:0043170//GO:0044237//GO:0019538//GO:0044238//GO:0006468//GO:0036211//GO:0044267//GO:0044260//GO:0071704//GO:0006793//GO:0008152//GO:0006796//GO:0009987//GO:0008150//GO:0043412	cellular protein modification process//phosphorylation//macromolecule metabolic process//cellular metabolic process//protein metabolic process//primary metabolic process//protein phosphorylation//protein modification process//cellular protein metabolic process//cellular macromolecule metabolic process//organic substance metabolic process//phosphorus metabolic process//metabolic process//phosphate…	GO:0016021//GO:0044425//GO:0031224//GO:0005575//GO:0016020	integral component of membrane//membrane part//intrinsic component of membrane//cellular_component//membrane	GO:0017076//GO:1901265//GO:0097367//GO:0032559//GO:0032549//GO:0005488//GO:0043168//GO:0016773//GO:0030247//GO:0004674//GO:0001882//GO:0016772//GO:0004672//GO:0001883//GO:0000166//GO:0003674//GO:0036094//GO:0043167//GO:0032550//GO:0035639//GO:0032555//GO:0032553//GO:0005524//GO:0016301//GO:0097159//GO:0001871//GO:0016740//GO:0030246//GO:0030554//GO:0003824//GO:1901363	purine nucleotide binding//nucleoside phosphate binding//carbohydrate derivative binding//adenyl ribonucleotide binding//ribonucleoside binding//binding//anion binding//phosphotransferase activity, alcohol group as acceptor//polysaccharide binding//protein serine/threonine kinase activity//nucleoside binding//transferase activity, transferring phosphorus-containing groups//protein kinase activity…	K04733 interleukin-1 receptor-associated kinase 4 [EC:2.7.11.1] | (RefSeq) probable receptor-like protein kinase At5g39020	http://www.genome.jp/dbget-bin/www_bget?sot:102603052	-	Protein kinase-like domain||Wall-associated receptor kinase, galacturonan-binding domain||Protein kinase, ATP binding site||Protein kinase domain||Serine/threonine-protein kinase, active site
412	PGSC0003DMG400019726	713.955	219.307	1.7029	2.9368e-08	1.4887e-06	UP	GO:0006796//GO:0009987//GO:0008150//GO:0043412//GO:0044260//GO:0071704//GO:0006793//GO:0008152//GO:0019538//GO:0036211//GO:0006468//GO:0044238//GO:0044267//GO:0006464//GO:0043170//GO:0016310//GO:0044237	phosphate-containing compound metabolic process//cellular process//biological_process//macromolecule modification//cellular macromolecule metabolic process//organic substance metabolic process//phosphorus metabolic process//metabolic process//protein metabolic process//protein modification process//protein phosphorylation//primary metabolic process//cellular protein metabolic process//cellular pr…	--	--	GO:0001871//GO:0097159//GO:0030246//GO:0016740//GO:1901363//GO:0003824//GO:0030554//GO:0036094//GO:0003674//GO:0043167//GO:0032555//GO:0035639//GO:0032550//GO:0016301//GO:0005524//GO:0032553//GO:0016773//GO:0030247//GO:0004672//GO:0016772//GO:0001882//GO:0000166//GO:0001883//GO:0017076//GO:0097367//GO:1901265//GO:0005488//GO:0032549//GO:0032559//GO:0043168	pattern binding//organic cyclic compound binding//carbohydrate binding//transferase activity//heterocyclic compound binding//catalytic activity//adenyl nucleotide binding//small molecule binding//molecular_function//ion binding//purine ribonucleotide binding//purine ribonucleoside triphosphate binding//purine ribonucleoside binding//kinase activity//ATP binding//ribonucleotide binding//phosphotra…	K04733 interleukin-1 receptor-associated kinase 4 [EC:2.7.11.1] | (RefSeq) probable receptor-like protein kinase At5g39020	http://www.genome.jp/dbget-bin/www_bget?sot:102603052	-	Serine/threonine-protein kinase, active site||Wall-associated receptor kinase, galacturonan-binding domain||Protein kinase, ATP binding site||Protein kinase domain||Protein kinase-like domain
413	PGSC0003DMG400019832	477.896	236.816	1.0129	0.0016339	0.014403	UP	GO:0046907//GO:0008150//GO:0006810//GO:0051234//GO:0033036//GO:0051649//GO:0034613//GO:0071702//GO:0051641//GO:0051179//GO:0015031//GO:0006886//GO:0045184//GO:0070727//GO:0008104	intracellular transport//biological_process//transport//establishment of localization//macromolecule localization//establishment of localization in cell//cellular protein localization//organic substance transport//cellular localization//localization//protein transport//intracellular protein transport//establishment of protein localization//cellular macromolecule localization//protein localization	GO:0042175//GO:0043226//GO:0005783//GO:0098796//GO:0071256//GO:0043231//GO:0005575//GO:0043227//GO:0016020//GO:0032991//GO:0098588//GO:0005789//GO:0005737//GO:0005622//GO:0012505//GO:0005784//GO:0031224//GO:0044464//GO:0044432//GO:0005623//GO:0044444//GO:0005791//GO:0030867//GO:0044446//GO:0043229//GO:0016021//GO:0044422//GO:0031090//GO:0044425//GO:0044424	nuclear outer membrane-endoplasmic reticulum membrane network//organelle//endoplasmic reticulum//membrane protein complex//translocon complex//intracellular membrane-bounded organelle//cellular_component//membrane-bounded organelle//membrane//protein-containing complex//bounding membrane of organelle//endoplasmic reticulum membrane//cytoplasm//intracellular//endomembrane system//Sec61 translocon …	--	--	K09481 protein transport protein SEC61 subunit beta | (RefSeq) protein transport protein Sec61 subunit beta-like	http://www.genome.jp/dbget-bin/www_bget?sot:102598588	-	Protein transport protein SecG/Sec61-beta/Sbh||Protein transport Sec61-beta/Sbh
414	PGSC0003DMG400019872	1307.23	353.544	1.8865	0.0011227	0.010737	UP	GO:0008152//GO:0042592//GO:0000103//GO:0065008//GO:0050789//GO:0019379//GO:0008150//GO:0019725//GO:0045454//GO:0009987//GO:0006790//GO:0055114//GO:0019419//GO:0044237//GO:0050794//GO:0065007	metabolic process//homeostatic process//sulfate assimilation//regulation of biological quality//regulation of biological process//sulfate assimilation, phosphoadenylyl sulfate reduction by phosphoadenylyl-sulfate reductase (thioredoxin)//biological_process//cellular homeostasis//cell redox homeostasis//cellular process//sulfur compound metabolic process//oxidation-reduction process//sulfate reduc…	GO:0005575//GO:0005623	cellular_component//cell	GO:0003674//GO:0003824//GO:0016491//GO:0016667//GO:0004604//GO:0016671	molecular_function//catalytic activity//oxidoreductase activity//oxidoreductase activity, acting on a sulfur group of donors//phosphoadenylyl-sulfate reductase (thioredoxin) activity//oxidoreductase activity, acting on a sulfur group of donors, disulfide as acceptor	K05907 adenylyl-sulfate reductase (glutathione) [EC:1.8.4.9] | (RefSeq) 5'-adenylylsulfate reductase 3, chloroplastic-like	http://www.genome.jp/dbget-bin/www_bget?sot:102579112	-	Rossmann-like alpha/beta/alpha sandwich fold||Thioredoxin-like fold||Phosphoadenosine phosphosulphate/adenosine 5'-phosphosulphate reductase||Thioredoxin domain||Thioredoxin-independent 5'-adenylylsulphate reductase||Phosphoadenosine phosphosulphate reductase
415	PGSC0003DMG400019882	398.753	140.123	1.5088	3.5287e-05	0.00064353	UP	GO:0008150//GO:0008152	biological_process//metabolic process	--	--	GO:0016740//GO:0003824//GO:0003674//GO:0016757//GO:0016758	transferase activity//catalytic activity//molecular_function//transferase activity, transferring glycosyl groups//transferase activity, transferring hexosyl groups	K08237 hydroquinone glucosyltransferase [EC:2.4.1.218] | (RefSeq) hydroquinone glucosyltransferase-like	http://www.genome.jp/dbget-bin/www_bget?sot:102604175	-	UDP-glycosyltransferase family, conserved site||UDP-glucuronosyl/UDP-glucosyltransferase
416	PGSC0003DMG400020105	895.974	437.982	1.0326	0.0002765	0.0034952	UP	GO:0046394//GO:0042558//GO:0044237//GO:0016053//GO:0044271//GO:0046653//GO:1901360//GO:0043436//GO:0044238//GO:0046483//GO:0042398//GO:0009108//GO:0051186//GO:0043603//GO:0009058//GO:0006807//GO:0019752//GO:0018130//GO:0009396//GO:0006732//GO:1901607//GO:0090407//GO:0035998//GO:0034641//GO:0046654//GO:0006760//GO:0071704//GO:1901605//GO:0006725//GO:1901576//GO:0043604//GO:0006520//GO:0006575//GO:…	carboxylic acid biosynthetic process//pteridine-containing compound metabolic process//cellular metabolic process//organic acid biosynthetic process//cellular nitrogen compound biosynthetic process//tetrahydrofolate metabolic process//organic cyclic compound metabolic process//oxoacid metabolic process//primary metabolic process//heterocycle metabolic process//cellular modified amino acid biosynt…	GO:0044424//GO:0044464//GO:0005622//GO:0005623//GO:0005575//GO:0005737	intracellular part//cell part//intracellular//cell//cellular_component//cytoplasm	GO:0019238//GO:0016814//GO:0003933//GO:0003674//GO:0016787//GO:0003934//GO:0003824//GO:0016810	cyclohydrolase activity//hydrolase activity, acting on carbon-nitrogen (but not peptide) bonds, in cyclic amidines//GTP cyclohydrolase activity//molecular_function//hydrolase activity//GTP cyclohydrolase I activity//catalytic activity//hydrolase activity, acting on carbon-nitrogen (but not peptide) bonds	K01495 GTP cyclohydrolase I [EC:3.5.4.16] | (RefSeq) GTP cyclohydrolase 1	http://www.genome.jp/dbget-bin/www_bget?sot:102591811	-	GTP cyclohydrolase I domain||GTP cyclohydrolase I
417	PGSC0003DMG400020116	294.548	68.2272	2.1101	2.6711e-07	9.9737e-06	UP	GO:0008150//GO:0008152//GO:0006508//GO:0071704//GO:0044238//GO:0019538//GO:0043170	biological_process//metabolic process//proteolysis//organic substance metabolic process//primary metabolic process//protein metabolic process//macromolecule metabolic process	--	--	GO:0003824//GO:0017171//GO:0004180//GO:0070011//GO:0016787//GO:0008236//GO:0004185//GO:0003674//GO:0070008//GO:0008238//GO:0008233	catalytic activity//serine hydrolase activity//carboxypeptidase activity//peptidase activity, acting on L-amino acid peptides//hydrolase activity//serine-type peptidase activity//serine-type carboxypeptidase activity//molecular_function//serine-type exopeptidase activity//exopeptidase activity//peptidase activity	K16296 serine carboxypeptidase-like clade I [EC:3.4.16.-] | (RefSeq) serine carboxypeptidase-like 20	http://www.genome.jp/dbget-bin/www_bget?sot:102586295	-	Alpha/Beta hydrolase fold||Serine carboxypeptidase, serine active site||Peptidase S10, serine carboxypeptidase
418	PGSC0003DMG400020288	1350.64	605.55	1.1573	0.0016386	0.014435	UP	--	--	--	--	--	--	no KO assigned | (RefSeq) uncharacterized LOC102598030	http://www.genome.jp/dbget-bin/www_bget?sot:102598030	-	Protein of unknown function DUF2996
419	PGSC0003DMG400020412	130.466	42.8557	1.6061	0.0017922	0.015504	UP	--	--	--	--	--	--	no KO assigned | (RefSeq) uncharacterized LOC102578884	http://www.genome.jp/dbget-bin/www_bget?sot:102578884	-	Protein of unknown function DUF1685
420	PGSC0003DMG400020638	283.17	92.3181	1.617	0.0013263	0.012247	UP	--	--	--	--	--	--	no KO assigned | (RefSeq) uncharacterized LOC102584365	http://www.genome.jp/dbget-bin/www_bget?sot:102584365	-	Protein of unknown function PDDEXK-like
421	PGSC0003DMG400020645	1396.69	666.898	1.0665	9.5832e-05	0.0014901	UP	--	--	GO:0044464//GO:0005622//GO:0044444//GO:0005623//GO:0043229//GO:0044424//GO:0043226//GO:0009579//GO:0009536//GO:0043227//GO:0005575//GO:0043231//GO:0005737//GO:0009507	cell part//intracellular//cytoplasmic part//cell//intracellular organelle//intracellular part//organelle//thylakoid//plastid//membrane-bounded organelle//cellular_component//intracellular membrane-bounded organelle//cytoplasm//chloroplast	--	--	no KO assigned | (RefSeq) uncharacterized LOC102589514	http://www.genome.jp/dbget-bin/www_bget?sot:102589514	-	Uncharacterised protein family Ycf54
422	PGSC0003DMG400020719	376.38	59.2139	2.6682	8.3727e-12	9.558e-10	UP	GO:0055114//GO:0008150//GO:0008152	oxidation-reduction process//biological_process//metabolic process	--	--	GO:0016491//GO:0003824//GO:0003674	oxidoreductase activity//catalytic activity//molecular_function	no KO assigned | (RefSeq) uncharacterized LOC102595883	http://www.genome.jp/dbget-bin/www_bget?sot:102595883	-	FAD/NAD(P)-binding domain
423	PGSC0003DMG400020728	85.3674	17.4851	2.2876	0.00072993	0.007583	UP	GO:0050794//GO:0050896//GO:0065007//GO:0007165//GO:0051716//GO:0007154//GO:0023052//GO:0050789//GO:0008150//GO:0009987	regulation of cellular process//response to stimulus//biological regulation//signal transduction//cellular response to stimulus//cell communication//signaling//regulation of biological process//biological_process//cellular process	--	--	--	--	no KO assigned | (RefSeq) TMV resistance protein N-like	http://www.genome.jp/dbget-bin/www_bget?sot:102590694	-	Toll/interleukin-1 receptor homology (TIR) domain
424	PGSC0003DMG400020730	556.881	241.596	1.2048	0.00015631	0.0022052	UP	GO:0019438//GO:2000112//GO:0006355//GO:0008150//GO:0031326//GO:0031323//GO:0044249//GO:0050789//GO:0009889//GO:1901362//GO:0080090//GO:0051171//GO:0009987//GO:0008152//GO:0051252//GO:1903506//GO:0006725//GO:0006351//GO:0034645//GO:0097659//GO:0071704//GO:2001141//GO:0044260//GO:1901576//GO:0034654//GO:0060255//GO:0010556//GO:0018130//GO:0050794//GO:0065007//GO:0032774//GO:0010468//GO:0034641//GO:…	aromatic compound biosynthetic process//regulation of cellular macromolecule biosynthetic process//regulation of transcription, DNA-templated//biological_process//regulation of cellular biosynthetic process//regulation of cellular metabolic process//cellular biosynthetic process//regulation of biological process//regulation of biosynthetic process//organic cyclic compound biosynthetic process//re…	GO:0043226//GO:0043227//GO:0043231//GO:0005575//GO:0005623//GO:0044464//GO:0005634//GO:0005622//GO:0044424//GO:0043229	organelle//membrane-bounded organelle//intracellular membrane-bounded organelle//cellular_component//cell//cell part//nucleus//intracellular//intracellular part//intracellular organelle	GO:1901363//GO:0003676//GO:0097159//GO:0003674//GO:0003677//GO:0005488	heterocyclic compound binding//nucleic acid binding//organic cyclic compound binding//molecular_function//DNA binding//binding	no KO assigned | (RefSeq) transcription factor DIVARICATA-like	http://www.genome.jp/dbget-bin/www_bget?sot:102581033	-	SANT/Myb domain||Homeobox domain-like||Myb domain||SANT domain||Myb domain, plants
425	PGSC0003DMG400020809	8498.57	4003.88	1.0858	4.4194e-06	0.00011329	UP	GO:0008152//GO:0055114//GO:0008150	metabolic process//oxidation-reduction process//biological_process	--	--	GO:0043167//GO:0003674//GO:0046906//GO:0005506//GO:0097159//GO:1901363//GO:0003824//GO:0016491//GO:0046872//GO:0005488//GO:0004497//GO:0043169//GO:0046914//GO:0020037//GO:0016705	ion binding//molecular_function//tetrapyrrole binding//iron ion binding//organic cyclic compound binding//heterocyclic compound binding//catalytic activity//oxidoreductase activity//metal ion binding//binding//monooxygenase activity//cation binding//transition metal ion binding//heme binding//oxidoreductase activity, acting on paired donors, with incorporation or reduction of molecular oxygen	K00512 steroid 17alpha-monooxygenase / 17alpha-hydroxyprogesterone deacetylase [EC:1.14.14.19 1.14.14.32] | (RefSeq) cytochrome P450 71D11-like	http://www.genome.jp/dbget-bin/www_bget?sot:102603333	-	Cytochrome P450, E-class, group I||Cytochrome P450||Cytochrome P450, conserved site
426	PGSC0003DMG400020899	203.211	80.3142	1.3392	0.0013683	0.012508	UP	GO:0006793//GO:0008152//GO:0044260//GO:0071704//GO:0008150//GO:0043412//GO:0006796//GO:0009987//GO:0044237//GO:0006464//GO:0043170//GO:0016310//GO:0044267//GO:0019538//GO:0036211//GO:0006468//GO:0044238	phosphorus metabolic process//metabolic process//cellular macromolecule metabolic process//organic substance metabolic process//biological_process//macromolecule modification//phosphate-containing compound metabolic process//cellular process//cellular metabolic process//cellular protein modification process//macromolecule metabolic process//phosphorylation//cellular protein metabolic process//pro…	GO:0005575//GO:0016020//GO:0044425//GO:0016021//GO:0031224	cellular_component//membrane//membrane part//integral component of membrane//intrinsic component of membrane	GO:0032555//GO:0035639//GO:0032550//GO:0016301//GO:0005524//GO:0032553//GO:0036094//GO:0003674//GO:0043167//GO:0030246//GO:0016740//GO:1901363//GO:0003824//GO:0030554//GO:0001871//GO:0097159//GO:0005488//GO:0032549//GO:0032559//GO:0043168//GO:0017076//GO:0097367//GO:1901265//GO:0004672//GO:0016772//GO:0001882//GO:0000166//GO:0001883//GO:0016773//GO:0004674//GO:0030247	purine ribonucleotide binding//purine ribonucleoside triphosphate binding//purine ribonucleoside binding//kinase activity//ATP binding//ribonucleotide binding//small molecule binding//molecular_function//ion binding//carbohydrate binding//transferase activity//heterocyclic compound binding//catalytic activity//adenyl nucleotide binding//pattern binding//organic cyclic compound binding//binding//r…	K04733 interleukin-1 receptor-associated kinase 4 [EC:2.7.11.1] | (RefSeq) probable receptor-like protein kinase At5g39020	http://www.genome.jp/dbget-bin/www_bget?sot:102603956	-	Serine/threonine-protein kinase, active site||Wall-associated receptor kinase, galacturonan-binding domain||Protein kinase domain||Protein kinase, ATP binding site||Protein kinase-like domain
427	PGSC0003DMG400021068	279.396	130.181	1.1018	0.0033327	0.02502	UP	--	--	--	--	GO:0043169//GO:0046872//GO:0005488//GO:0003674//GO:0043167//GO:0005509	cation binding//metal ion binding//binding//molecular_function//ion binding//calcium ion binding	K02183 calmodulin | (RefSeq) calmodulin	http://www.genome.jp/dbget-bin/www_bget?sot:102599353	-	EF-hand domain||EF-Hand 1, calcium-binding site||EF-hand domain pair
428	PGSC0003DMG400021119	74.0364	10.9522	2.757	0.00011448	0.0017164	UP	GO:0044271//GO:0006139//GO:1901360//GO:0044237//GO:0009059//GO:0019219//GO:0019222//GO:0043170//GO:0065007//GO:0010468//GO:0032774//GO:0034641//GO:0016070//GO:0034654//GO:0010556//GO:0060255//GO:0018130//GO:0050794//GO:0009058//GO:0006807//GO:0010467//GO:0090304//GO:0044238//GO:0046483//GO:1903506//GO:0008152//GO:0051252//GO:2001141//GO:1901576//GO:0044260//GO:0006725//GO:0034645//GO:0006351//GO:…	cellular nitrogen compound biosynthetic process//nucleobase-containing compound metabolic process//organic cyclic compound metabolic process//cellular metabolic process//macromolecule biosynthetic process//regulation of nucleobase-containing compound metabolic process//regulation of metabolic process//macromolecule metabolic process//biological regulation//regulation of gene expression//RNA biosy…	GO:0044424//GO:0043229//GO:0005623//GO:0005634//GO:0005622//GO:0044464//GO:0043231//GO:0005575//GO:0043227//GO:0043226	intracellular part//intracellular organelle//cell//nucleus//intracellular//cell part//intracellular membrane-bounded organelle//cellular_component//membrane-bounded organelle//organelle	GO:0005488//GO:0003677//GO:0003674//GO:1901363//GO:0003676//GO:0097159	binding//DNA binding//molecular_function//heterocyclic compound binding//nucleic acid binding//organic cyclic compound binding	no KO assigned | (RefSeq) transcription factor JUNGBRUNNEN 1-like	http://www.genome.jp/dbget-bin/www_bget?sot:102597234	-	NAC domain
429	PGSC0003DMG400021131	851.579	263.123	1.6944	0.0027546	0.021635	UP	--	--	GO:0005575//GO:0016020//GO:0031224//GO:0016021//GO:0044425	cellular_component//membrane//intrinsic component of membrane//integral component of membrane//membrane part	GO:0097159//GO:1901363//GO:0030554//GO:0003674//GO:0036094//GO:0043167//GO:0035639//GO:0032555//GO:0032550//GO:0032553//GO:0005524//GO:0001882//GO:0000166//GO:0001883//GO:0017076//GO:0097367//GO:1901265//GO:0005488//GO:0032559//GO:0032549//GO:0043168	organic cyclic compound binding//heterocyclic compound binding//adenyl nucleotide binding//molecular_function//small molecule binding//ion binding//purine ribonucleoside triphosphate binding//purine ribonucleotide binding//purine ribonucleoside binding//ribonucleotide binding//ATP binding//nucleoside binding//nucleotide binding//purine nucleoside binding//purine nucleotide binding//carbohydrate d…	no KO assigned | (RefSeq) AAA-ATPase At3g28580-like	http://www.genome.jp/dbget-bin/www_bget?sot:102580725	-	ATPase, AAA-type, core||AAA+ ATPase domain||AAA-type ATPase, N-terminal domain||P-loop containing nucleoside triphosphate hydrolase||ATPase, AAA-type, conserved site
430	PGSC0003DMG400021144	12933.5	5674.96	1.1884	5.5262e-05	0.00093805	UP	GO:0044237//GO:0008150//GO:0009987//GO:0008152//GO:0015979	cellular metabolic process//biological_process//cellular process//metabolic process//photosynthesis	GO:0009522//GO:0009521//GO:0005623//GO:0044444//GO:0005622//GO:0044464//GO:0031224//GO:0044424//GO:0044425//GO:0043229//GO:0016021//GO:0098796//GO:0009536//GO:0044436//GO:0034357//GO:0009579//GO:0043226//GO:0009507//GO:0005737//GO:0043231//GO:0005575//GO:0009538//GO:0032991//GO:0043227//GO:0016020	photosystem I//photosystem//cell//cytoplasmic part//intracellular//cell part//intrinsic component of membrane//intracellular part//membrane part//intracellular organelle//integral component of membrane//membrane protein complex//plastid//thylakoid part//photosynthetic membrane//thylakoid//organelle//chloroplast//cytoplasm//intracellular membrane-bounded organelle//cellular_component//photosystem …	--	--	K02694 photosystem I subunit III | (RefSeq) photosystem I reaction center subunit III, chloroplastic-like	http://www.genome.jp/dbget-bin/www_bget?sot:102585281	PSAF	Photosystem I PsaF, reaction centre subunit III
431	PGSC0003DMG400021152	305.944	28.9663	3.4008	0.00057354	0.006256	UP	GO:0008152//GO:0008150//GO:0055114	metabolic process//biological_process//oxidation-reduction process	--	--	GO:0008270//GO:0003674//GO:0043167//GO:0016491//GO:0003824//GO:0005488//GO:0046872//GO:0046914//GO:0043169	zinc ion binding//molecular_function//ion binding//oxidoreductase activity//catalytic activity//binding//metal ion binding//transition metal ion binding//cation binding	K00083 cinnamyl-alcohol dehydrogenase [EC:1.1.1.195] | (RefSeq) probable cinnamyl alcohol dehydrogenase 6	http://www.genome.jp/dbget-bin/www_bget?sot:102579562	-	Alcohol dehydrogenase, zinc-type, conserved site||Alcohol dehydrogenase, C-terminal||Polyketide synthase, enoylreductase domain||NAD(P)-binding domain||GroES-like||Alcohol dehydrogenase, N-terminal
432	PGSC0003DMG400021174	635.805	135.54	2.2299	0.0023671	0.019291	UP	--	--	--	--	--	--	no KO assigned | (RefSeq) 187-kDa microtubule-associated protein AIR9	http://www.genome.jp/dbget-bin/www_bget?sot:102590895	--	--
433	PGSC0003DMG400021406	509.614	139.599	1.8681	1.2963e-08	7.274e-07	UP	GO:0008283//GO:0008150	cell proliferation//biological_process	GO:0005576//GO:0005575	extracellular region//cellular_component	GO:0005488//GO:0005515//GO:0003674//GO:0008083//GO:0005102	binding//protein binding//molecular_function//growth factor activity//signaling receptor binding	no KO assigned | (RefSeq) PSK2; phytosulfokines 3-like	http://www.genome.jp/dbget-bin/www_bget?sot:102586237	-	Phytosulfokine
434	PGSC0003DMG400021407	127.84	6.29708	4.3435	5.1651e-08	2.4521e-06	UP	GO:0008283//GO:0008150	cell proliferation//biological_process	GO:0005576//GO:0005575	extracellular region//cellular_component	GO:0005515//GO:0005488//GO:0005102//GO:0008083//GO:0003674	protein binding//binding//signaling receptor binding//growth factor activity//molecular_function	no KO assigned | (RefSeq) PSK2; phytosulfokines 3-like	http://www.genome.jp/dbget-bin/www_bget?sot:102586237	-	Phytosulfokine
435	PGSC0003DMG400021423	2990.59	1313.61	1.1869	2.1001e-06	6.0254e-05	UP	GO:0016070//GO:0034641//GO:0032774//GO:0010468//GO:0065007//GO:0050794//GO:0018130//GO:0060255//GO:0010556//GO:0034654//GO:0010467//GO:0009058//GO:0006807//GO:0044238//GO:0046483//GO:0090304//GO:0044271//GO:1901360//GO:0006139//GO:0044237//GO:0009059//GO:0019219//GO:0043170//GO:0019222//GO:0050789//GO:0044249//GO:0031323//GO:0009889//GO:2000112//GO:0008150//GO:0031326//GO:0006355//GO:0019438//GO:…	RNA metabolic process//cellular nitrogen compound metabolic process//RNA biosynthetic process//regulation of gene expression//biological regulation//regulation of cellular process//heterocycle biosynthetic process//regulation of macromolecule metabolic process//regulation of macromolecule biosynthetic process//nucleobase-containing compound biosynthetic process//gene expression//biosynthetic proc…	GO:0005623//GO:0005634//GO:0005622//GO:0044464//GO:0044424//GO:0043229//GO:0043226//GO:0043231//GO:0005575//GO:0043227	cell//nucleus//intracellular//cell part//intracellular part//intracellular organelle//organelle//intracellular membrane-bounded organelle//cellular_component//membrane-bounded organelle	GO:0003677//GO:0005488//GO:0043565//GO:1901363//GO:0003676//GO:0097159//GO:0003674//GO:0003700	DNA binding//binding//sequence-specific DNA binding//heterocyclic compound binding//nucleic acid binding//organic cyclic compound binding//molecular_function//DNA-binding transcription factor activity	K09338 homeobox-leucine zipper protein | (RefSeq) homeobox-leucine zipper protein HAT22-like	http://www.genome.jp/dbget-bin/www_bget?sot:102581277	-	Leucine zipper, homeobox-associated||Homeobox, conserved site||Homeobox domain-like||Homeobox domain
436	PGSC0003DMG400021454	2473.01	752.944	1.7157	1.2514e-06	3.8585e-05	UP	--	--	GO:0031224//GO:0016021//GO:0044425//GO:0005575//GO:0016020	intrinsic component of membrane//integral component of membrane//membrane part//cellular_component//membrane	--	--	no KO assigned | (RefSeq) protein YLS9-like	http://www.genome.jp/dbget-bin/www_bget?sot:102600044	-	Late embryogenesis abundant protein, LEA-14||Immunoglobulin-like fold
437	PGSC0003DMG400021550	356.857	41.1265	3.1172	0.0050299	0.034355	UP	GO:1901659//GO:0009161//GO:0016310//GO:0042278//GO:0006753//GO:0072522//GO:0044271//GO:1901360//GO:0006139//GO:0006166//GO:0009156//GO:0044237//GO:0009058//GO:0006807//GO:0009150//GO:0046033//GO:0009124//GO:0046390//GO:1901293//GO:0009167//GO:0046483//GO:0044238//GO:0009165//GO:0090407//GO:0009259//GO:0034641//GO:0019693//GO:0034654//GO:0018130//GO:1901135//GO:0009119//GO:0043094//GO:0009116//GO:…	glycosyl compound biosynthetic process//ribonucleoside monophosphate metabolic process//phosphorylation//purine nucleoside metabolic process//nucleoside phosphate metabolic process//purine-containing compound biosynthetic process//cellular nitrogen compound biosynthetic process//organic cyclic compound metabolic process//nucleobase-containing compound metabolic process//purine ribonucleoside salv…	--	--	GO:0019205//GO:0004001//GO:0016773//GO:0016772//GO:0003674//GO:0016301//GO:0016740//GO:0019206//GO:0003824	nucleobase-containing compound kinase activity//adenosine kinase activity//phosphotransferase activity, alcohol group as acceptor//transferase activity, transferring phosphorus-containing groups//molecular_function//kinase activity//transferase activity//nucleoside kinase activity//catalytic activity	K00856 adenosine kinase [EC:2.7.1.20] | (RefSeq) adenosine kinase isoform 1T-like protein	http://www.genome.jp/dbget-bin/www_bget?sot:102577684	-	Carbohydrate/puine kinase, PfkB, conserved site||Ribokinase-like||Carbohydrate kinase PfkB||Adenosine kinase
438	PGSC0003DMG400021596	194.873	80.8116	1.2699	0.0020367	0.017135	UP	GO:0016311//GO:0044237//GO:0008150//GO:0009987//GO:0006796//GO:0008152//GO:0006793	dephosphorylation//cellular metabolic process//biological_process//cellular process//phosphate-containing compound metabolic process//metabolic process//phosphorus metabolic process	--	--	GO:0003993//GO:0042578//GO:0003824//GO:0016788//GO:0016787//GO:0016791//GO:0003674	acid phosphatase activity//phosphoric ester hydrolase activity//catalytic activity//hydrolase activity, acting on ester bonds//hydrolase activity//phosphatase activity//molecular_function	no KO assigned | (RefSeq) acid phosphatase 1	http://www.genome.jp/dbget-bin/www_bget?sot:102589261	-	Acid phosphatase, plant||HAD-like domain||Vegetative storage protein/acid phosphatase||Acid phosphatase, class B-like
439	PGSC0003DMG400021686	303.122	126.495	1.2608	0.0031479	0.023896	UP	--	--	--	--	--	--	no KO assigned | (RefSeq) uncharacterized LOC102601474	http://www.genome.jp/dbget-bin/www_bget?sot:102601474	--	--
440	PGSC0003DMG400021701	992.52	418.637	1.2454	1.118e-05	0.00025065	UP	--	--	GO:0005575//GO:0043231//GO:0070013//GO:0043227//GO:0005739//GO:0044429//GO:0005759//GO:0043233//GO:0005737//GO:0043226//GO:0044422//GO:0043229//GO:0044446//GO:0044424//GO:0005622//GO:0031974//GO:0044464//GO:0005623//GO:0044444	cellular_component//intracellular membrane-bounded organelle//intracellular organelle lumen//membrane-bounded organelle//mitochondrion//mitochondrial part//mitochondrial matrix//organelle lumen//cytoplasm//organelle//organelle part//intracellular organelle//intracellular organelle part//intracellular part//intracellular//membrane-enclosed lumen//cell part//cell//cytoplasmic part	--	--	K15414 complement component 1 Q subcomponent-binding protein, mitochondrial | (RefSeq) uncharacterized protein At2g39795, mitochondrial	http://www.genome.jp/dbget-bin/www_bget?sot:102592862	-	Mitochondrial glycoprotein
441	PGSC0003DMG400021728	618.924	268.91	1.2026	0.0020981	0.017539	UP	--	--	GO:0005575//GO:0016020//GO:0031224//GO:0016021//GO:0044425	cellular_component//membrane//intrinsic component of membrane//integral component of membrane//membrane part	--	--	no KO assigned | (RefSeq) uncharacterized LOC102604949	http://www.genome.jp/dbget-bin/www_bget?sot:102604949	-	Transmembrane protein TauE-like
442	PGSC0003DMG400021754	374.267	159.352	1.2319	0.00033893	0.0041107	UP	--	--	--	--	--	--	--	--	--	--
443	PGSC0003DMG400021820	76.577	22.2424	1.7836	0.0069489	0.043643	UP	GO:0005984//GO:0005975//GO:1901576//GO:0044262//GO:0071704//GO:0006793//GO:0009311//GO:0008152//GO:0009312//GO:0006796//GO:0009987//GO:0016051//GO:0008150//GO:0044249//GO:0046351//GO:0005992//GO:0044237//GO:0009058//GO:0016311//GO:0044238//GO:0034637//GO:0005991	disaccharide metabolic process//carbohydrate metabolic process//organic substance biosynthetic process//cellular carbohydrate metabolic process//organic substance metabolic process//phosphorus metabolic process//oligosaccharide metabolic process//metabolic process//oligosaccharide biosynthetic process//phosphate-containing compound metabolic process//cellular process//carbohydrate biosynthetic pr…	--	--	GO:0003674//GO:0016791//GO:0016787//GO:0016788//GO:0019203//GO:0003824//GO:0004805//GO:0042578	molecular_function//phosphatase activity//hydrolase activity//hydrolase activity, acting on ester bonds//carbohydrate phosphatase activity//catalytic activity//trehalose-phosphatase activity//phosphoric ester hydrolase activity	K01087 trehalose 6-phosphate phosphatase [EC:3.1.3.12] | (RefSeq) probable trehalose-phosphate phosphatase H	http://www.genome.jp/dbget-bin/www_bget?sot:102592898	-	HAD-like domain||HAD-superfamily hydrolase, subfamily IIB||Trehalose-phosphatase
444	PGSC0003DMG400021821	301.385	125.8	1.2605	0.00076937	0.0079076	UP	--	--	--	--	--	--	no KO assigned | (RefSeq) uncharacterized LOC102587376	http://www.genome.jp/dbget-bin/www_bget?sot:102587376	-	Zf-FLZ domain
445	PGSC0003DMG400021857	51.6594	6.14337	3.0719	0.00063709	0.0068077	UP	GO:1903506//GO:0051252//GO:0008152//GO:2001141//GO:0044260//GO:1901576//GO:0006725//GO:0034645//GO:0006351//GO:0097659//GO:0071704//GO:0006355//GO:0008150//GO:0031326//GO:2000112//GO:0009889//GO:0044249//GO:0031323//GO:0050789//GO:0019438//GO:0080090//GO:1901362//GO:0009987//GO:0051171//GO:1901360//GO:0006139//GO:0044271//GO:0044237//GO:0019219//GO:0009059//GO:0019222//GO:0043170//GO:0065007//GO:…	regulation of nucleic acid-templated transcription//regulation of RNA metabolic process//metabolic process//regulation of RNA biosynthetic process//cellular macromolecule metabolic process//organic substance biosynthetic process//cellular aromatic compound metabolic process//cellular macromolecule biosynthetic process//transcription, DNA-templated//nucleic acid-templated transcription//organic su…	GO:0005575//GO:0043231//GO:0043227//GO:0043226//GO:0044424//GO:0043229//GO:0005623//GO:0005622//GO:0005634//GO:0044464	cellular_component//intracellular membrane-bounded organelle//membrane-bounded organelle//organelle//intracellular part//intracellular organelle//cell//intracellular//nucleus//cell part	GO:0003674//GO:0003676//GO:1901363//GO:0097159//GO:0005488//GO:0003677	molecular_function//nucleic acid binding//heterocyclic compound binding//organic cyclic compound binding//binding//DNA binding	no KO assigned | (RefSeq) transcription activator GLK1-like	http://www.genome.jp/dbget-bin/www_bget?sot:102593464	-	Myb domain||Homeobox domain-like||SANT/Myb domain||Myb domain, plants
446	PGSC0003DMG400022037	33.5691	1.22922	4.7713	0.00032361	0.0039586	UP	GO:0030001//GO:0008150//GO:0006810//GO:0051234//GO:0051179//GO:0006811//GO:0006812	metal ion transport//biological_process//transport//establishment of localization//localization//ion transport//cation transport	--	--	GO:0043167//GO:0003674//GO:0043169//GO:0005488//GO:0046872	ion binding//molecular_function//cation binding//binding//metal ion binding	no KO assigned | (RefSeq) heavy metal-associated isoprenylated plant protein 26	http://www.genome.jp/dbget-bin/www_bget?sot:102583503	-	Heavy metal-associated domain, HMA
447	PGSC0003DMG400022044	442.296	178.33	1.3105	8.6801e-05	0.0013714	UP	--	--	--	--	--	--	K06889 uncharacterized protein | (RefSeq) uncharacterized LOC102589585	http://www.genome.jp/dbget-bin/www_bget?sot:102589585	-	Alpha/Beta hydrolase fold
448	PGSC0003DMG400022114	545.876	244.248	1.1602	0.00026076	0.0033287	UP	--	--	GO:0031224//GO:0044425//GO:0016021//GO:0016020//GO:0005575	intrinsic component of membrane//membrane part//integral component of membrane//membrane//cellular_component	GO:0043169//GO:0010333//GO:0005488//GO:0016835//GO:0046872//GO:0016838//GO:0003824//GO:0000287//GO:0016829//GO:0043167//GO:0003674	cation binding//terpene synthase activity//binding//carbon-oxygen lyase activity//metal ion binding//carbon-oxygen lyase activity, acting on phosphates//catalytic activity//magnesium ion binding//lyase activity//ion binding//molecular_function	K04121 ent-kaurene synthase [EC:4.2.3.19] | (RefSeq) ent-kaur-16-ene synthase, chloroplastic	http://www.genome.jp/dbget-bin/www_bget?sot:102602928	GA2	Terpene synthase, metal-binding domain||Isoprenoid synthase domain
449	PGSC0003DMG400022193	608.636	48.299	3.6555	4.0795e-08	1.9937e-06	UP	--	--	--	--	--	--	K06911 uncharacterized protein | (RefSeq) pirin-like protein At1g50590	http://www.genome.jp/dbget-bin/www_bget?sot:102594317	-	RmlC-like cupin domain||Pirin||RmlC-like jelly roll fold||Pirin, C-terminal domain||Pirin, N-terminal domain
450	PGSC0003DMG400022307	468.367	232.762	1.0088	0.0018026	0.015564	UP	GO:0008150//GO:0071704//GO:0005975//GO:0008152//GO:0044238	biological_process//organic substance metabolic process//carbohydrate metabolic process//metabolic process//primary metabolic process	--	--	GO:0003824//GO:0043167//GO:0003674//GO:0043169//GO:0005488	catalytic activity//ion binding//molecular_function//cation binding//binding	K00700 1,4-alpha-glucan branching enzyme [EC:2.4.1.18] | (RefSeq) SBE, SBE1, sbeI; 1,4-alpha-glucan-branching enzyme-like	http://www.genome.jp/dbget-bin/www_bget?sot:102596498	EMB2729	Glycoside hydrolase superfamily||Alpha-amylase/branching enzyme, C-terminal all beta
451	PGSC0003DMG400022391	160.896	25.3171	2.6679	3.4456e-06	9.1359e-05	UP	GO:0006793//GO:0008152//GO:0044260//GO:0071704//GO:0044706//GO:0008150//GO:0043412//GO:0009856//GO:0048544//GO:0006796//GO:0008037//GO:0009987//GO:0044237//GO:0006464//GO:0051704//GO:0007154//GO:0043170//GO:0044703//GO:0022414//GO:0032501//GO:0009875//GO:0016310//GO:0044267//GO:0019538//GO:0044238//GO:0006468//GO:0036211	phosphorus metabolic process//metabolic process//cellular macromolecule metabolic process//organic substance metabolic process//multi-multicellular organism process//biological_process//macromolecule modification//pollination//recognition of pollen//phosphate-containing compound metabolic process//cell recognition//cellular process//cellular metabolic process//cellular protein modification proces…	GO:0005575//GO:0016020//GO:0044425//GO:0016021//GO:0031224	cellular_component//membrane//membrane part//integral component of membrane//intrinsic component of membrane	GO:0035639//GO:0032555//GO:0032550//GO:0016301//GO:0032553//GO:0005524//GO:0003674//GO:0036094//GO:0043167//GO:0016740//GO:1901363//GO:0030554//GO:0003824//GO:0097159//GO:0005488//GO:0032559//GO:0032549//GO:0043168//GO:0017076//GO:0097367//GO:1901265//GO:0004672//GO:0001882//GO:0016772//GO:0000166//GO:0001883//GO:0016773//GO:0004674	purine ribonucleoside triphosphate binding//purine ribonucleotide binding//purine ribonucleoside binding//kinase activity//ribonucleotide binding//ATP binding//molecular_function//small molecule binding//ion binding//transferase activity//heterocyclic compound binding//adenyl nucleotide binding//catalytic activity//organic cyclic compound binding//binding//adenyl ribonucleotide binding//ribonucle…	no KO assigned | (RefSeq) G-type lectin S-receptor-like serine/threonine-protein kinase At1g11330	http://www.genome.jp/dbget-bin/www_bget?sot:102588603	-	Protein kinase-like domain||Serine-threonine/tyrosine-protein kinase, catalytic domain||S-locus glycoprotein domain||Bulb-type lectin domain||Serine/threonine-protein kinase, active site||PAN/Apple domain||S-receptor-like serine/threonine-protein kinase||Protein kinase domain
452	PGSC0003DMG400022427	121.062	30.0941	2.0082	0.00041999	0.0048858	UP	--	--	GO:0005575//GO:0016020//GO:0016021//GO:0044425//GO:0031224	cellular_component//membrane//integral component of membrane//membrane part//intrinsic component of membrane	--	--	no KO assigned | (RefSeq) uncharacterized LOC102578637	http://www.genome.jp/dbget-bin/www_bget?sot:102578637	--	--
453	PGSC0003DMG400022596	242.856	77.5963	1.646	0.0077813	0.047399	UP	GO:0008150//GO:0043412//GO:0006796//GO:0009987//GO:0006793//GO:0008152//GO:0044260//GO:0071704//GO:0044267//GO:0019538//GO:0044238//GO:0006468//GO:0036211//GO:0044237//GO:0006464//GO:0043170//GO:0016310	biological_process//macromolecule modification//phosphate-containing compound metabolic process//cellular process//phosphorus metabolic process//metabolic process//cellular macromolecule metabolic process//organic substance metabolic process//cellular protein metabolic process//protein metabolic process//primary metabolic process//protein phosphorylation//protein modification process//cellular me…	GO:0005575//GO:0016020//GO:0031224//GO:0044425//GO:0016021	cellular_component//membrane//intrinsic component of membrane//membrane part//integral component of membrane	GO:0016740//GO:1901363//GO:0003824//GO:0030554//GO:0097159//GO:0035639//GO:0032555//GO:0032550//GO:0016301//GO:0032553//GO:0005524//GO:0003674//GO:0036094//GO:0043167//GO:0004672//GO:0001882//GO:0016772//GO:0000166//GO:0001883//GO:0016773//GO:0005488//GO:0032549//GO:0032559//GO:0043168//GO:0017076//GO:0097367//GO:1901265	transferase activity//heterocyclic compound binding//catalytic activity//adenyl nucleotide binding//organic cyclic compound binding//purine ribonucleoside triphosphate binding//purine ribonucleotide binding//purine ribonucleoside binding//kinase activity//ribonucleotide binding//ATP binding//molecular_function//small molecule binding//ion binding//protein kinase activity//nucleoside binding//tran…	no KO assigned | (RefSeq) probable serine/threonine-protein kinase At1g18390	http://www.genome.jp/dbget-bin/www_bget?sot:102591381	-	Wall-associated receptor kinase, C-terminal||Protein kinase-like domain||Tyrosine-protein kinase, active site||Protein kinase, ATP binding site||Protein kinase domain
454	PGSC0003DMG400022618	632.168	300.422	1.0733	0.0004452	0.0051017	UP	GO:0008152//GO:0008150//GO:0055114	metabolic process//biological_process//oxidation-reduction process	--	--	GO:0043168//GO:0005488//GO:0071949//GO:1901265//GO:0048037//GO:0000166//GO:0043167//GO:0003674//GO:0036094//GO:1901363//GO:0003824//GO:0016491//GO:0050660//GO:0050662//GO:0097159	anion binding//binding//FAD binding//nucleoside phosphate binding//cofactor binding//nucleotide binding//ion binding//molecular_function//small molecule binding//heterocyclic compound binding//catalytic activity//oxidoreductase activity//flavin adenine dinucleotide binding//coenzyme binding//organic cyclic compound binding	no KO assigned | (RefSeq) putative polyketide hydroxylase	http://www.genome.jp/dbget-bin/www_bget?sot:102592606	-	FAD/NAD(P)-binding domain||FAD-binding domain
455	PGSC0003DMG400022670	33.3588	1.84705	4.1748	0.00095576	0.0094498	UP	GO:0043412//GO:0008150//GO:0009987//GO:0006796//GO:0008152//GO:0006793//GO:0071704//GO:0044260//GO:0044267//GO:0044238//GO:0006468//GO:0036211//GO:0019538//GO:0044237//GO:0043170//GO:0016310//GO:0006464	macromolecule modification//biological_process//cellular process//phosphate-containing compound metabolic process//metabolic process//phosphorus metabolic process//organic substance metabolic process//cellular macromolecule metabolic process//cellular protein metabolic process//primary metabolic process//protein phosphorylation//protein modification process//protein metabolic process//cellular me…	GO:0016020//GO:0005575//GO:0031224//GO:0044425//GO:0016021	membrane//cellular_component//intrinsic component of membrane//membrane part//integral component of membrane	GO:1901363//GO:0030554//GO:0003824//GO:0016740//GO:0097159//GO:0016301//GO:0032553//GO:0005524//GO:0035639//GO:0032555//GO:0032550//GO:0043167//GO:0003674//GO:0036094//GO:0000166//GO:0001883//GO:0004672//GO:0001882//GO:0016772//GO:0016773//GO:0043168//GO:0005488//GO:0032559//GO:0032549//GO:0097367//GO:1901265//GO:0017076	heterocyclic compound binding//adenyl nucleotide binding//catalytic activity//transferase activity//organic cyclic compound binding//kinase activity//ribonucleotide binding//ATP binding//purine ribonucleoside triphosphate binding//purine ribonucleotide binding//purine ribonucleoside binding//ion binding//molecular_function//small molecule binding//nucleotide binding//purine nucleoside binding//pr…	K04733 interleukin-1 receptor-associated kinase 4 [EC:2.7.11.1] | (RefSeq) proline-rich receptor-like protein kinase PERK15	http://www.genome.jp/dbget-bin/www_bget?sot:102596287	-	Serine-threonine/tyrosine-protein kinase, catalytic domain||Protein kinase-like domain||Protein kinase domain||Protein kinase, ATP binding site
456	PGSC0003DMG400022824	190.007	14.3257	3.7294	4.3776e-09	2.6996e-07	UP	GO:0032502//GO:0051171//GO:0009987//GO:1901362//GO:0080090//GO:0048367//GO:0031323//GO:0044249//GO:0050789//GO:0009889//GO:0048731//GO:2000112//GO:0006355//GO:0009791//GO:0009908//GO:0031326//GO:0008150//GO:0048608//GO:0019438//GO:2001141//GO:1901576//GO:0044260//GO:0006351//GO:0034645//GO:0071704//GO:0097659//GO:0006725//GO:0090567//GO:0061458//GO:1903506//GO:0008152//GO:0051252//GO:0010467//GO:…	developmental process//regulation of nitrogen compound metabolic process//cellular process//organic cyclic compound biosynthetic process//regulation of primary metabolic process//shoot system development//regulation of cellular metabolic process//cellular biosynthetic process//regulation of biological process//regulation of biosynthetic process//system development//regulation of cellular macromol…	GO:0043226//GO:0043231//GO:0005575//GO:0043227//GO:0005634//GO:0005622//GO:0044464//GO:0005623//GO:0043229//GO:0044424	organelle//intracellular membrane-bounded organelle//cellular_component//membrane-bounded organelle//nucleus//intracellular//cell part//cell//intracellular organelle//intracellular part	GO:0097159//GO:1901363//GO:0003676//GO:0003674//GO:0043167//GO:0003700//GO:0043169//GO:0003677//GO:0046872//GO:0005488	organic cyclic compound binding//heterocyclic compound binding//nucleic acid binding//molecular_function//ion binding//DNA-binding transcription factor activity//cation binding//DNA binding//metal ion binding//binding	no KO assigned | (RefSeq) squamosa promoter-binding protein 1-like	http://www.genome.jp/dbget-bin/www_bget?sot:102581816	-	Transcription factor, SBP-box||Squamosa promoter-binding protein
457	PGSC0003DMG400022923	603.758	101.531	2.572	0.0013625	0.01247	UP	--	--	--	--	--	--	--	--	--	--
458	PGSC0003DMG400022929	1802.45	214.834	3.0687	1.1938e-10	1.0706e-08	UP	GO:0023052//GO:0001101//GO:0009617//GO:0044283//GO:0009751//GO:0048731//GO:0044249//GO:1901566//GO:0050789//GO:1901564//GO:0008150//GO:0042221//GO:0009987//GO:0071229//GO:0002376//GO:0048367//GO:0048366//GO:0044281//GO:0009863//GO:0009607//GO:0032502//GO:0008652//GO:0006082//GO:0009066//GO:1901701//GO:0043207//GO:0008152//GO:0042742//GO:0009627//GO:0009085//GO:1901605//GO:0071704//GO:0051707//GO:…	signaling//response to acid chemical//response to bacterium//small molecule biosynthetic process//response to salicylic acid//system development//cellular biosynthetic process//organonitrogen compound biosynthetic process//regulation of biological process//organonitrogen compound metabolic process//biological_process//response to chemical//cellular process//cellular response to acid chemical//imm…	--	--	GO:1901363//GO:0003824//GO:0016740//GO:0097159//GO:0008483//GO:0030170//GO:0043167//GO:0016769//GO:0003674//GO:0010285//GO:0043168//GO:0005488//GO:0048037	heterocyclic compound binding//catalytic activity//transferase activity//organic cyclic compound binding//transaminase activity//pyridoxal phosphate binding//ion binding//transferase activity, transferring nitrogenous groups//molecular_function//L,L-diaminopimelate aminotransferase activity//anion binding//binding//cofactor binding	K10206 LL-diaminopimelate aminotransferase [EC:2.6.1.83] | (RefSeq) aminotransferase ALD1	http://www.genome.jp/dbget-bin/www_bget?sot:102580299	ALD1	Pyridoxal phosphate-dependent transferase, major region, subdomain 1||Aminotransferase, class I/classII||LL-diaminopimelate aminotransferase||Pyridoxal phosphate-dependent transferase||Pyridoxal phosphate-dependent transferase, subdomain 2
459	PGSC0003DMG400023132	790.039	382.34	1.0471	0.00028881	0.0036112	UP	--	--	--	--	--	--	K12821 pre-mRNA-processing factor 40 | (RefSeq) pre-mRNA-processing protein 40A-like	http://www.genome.jp/dbget-bin/www_bget?sot:102586174	--	--
460	PGSC0003DMG400023221	138.556	26.2984	2.3974	1.0158e-05	0.00023127	UP	GO:0006950//GO:0050896//GO:0006952//GO:0009607//GO:0008150	response to stress//response to stimulus//defense response//response to biotic stimulus//biological_process	--	--	--	--	no KO assigned | (RefSeq) kirola-like	http://www.genome.jp/dbget-bin/www_bget?sot:102586380	-	START-like domain||Bet v I/Major latex protein
461	PGSC0003DMG400023272	6282.32	2884.54	1.123	3.9078e-06	0.00010181	UP	GO:0044260//GO:1901576//GO:0043604//GO:0071704//GO:0006518//GO:0034645//GO:0008152//GO:0009987//GO:1901566//GO:0044249//GO:0008150//GO:1901564//GO:0009059//GO:0043170//GO:0044271//GO:0043043//GO:0044237//GO:0043603//GO:0010467//GO:0009058//GO:0019538//GO:0006807//GO:0044238//GO:0006412//GO:0034641//GO:0006414//GO:0044267	cellular macromolecule metabolic process//organic substance biosynthetic process//amide biosynthetic process//organic substance metabolic process//peptide metabolic process//cellular macromolecule biosynthetic process//metabolic process//cellular process//organonitrogen compound biosynthetic process//cellular biosynthetic process//biological_process//organonitrogen compound metabolic process//mac…	GO:0005575//GO:0005737//GO:0044424//GO:0005622//GO:0044464//GO:0005623	cellular_component//cytoplasm//intracellular part//intracellular//cell part//cell	GO:0036094//GO:0016818//GO:0003674//GO:0043167//GO:0032555//GO:0035639//GO:0032550//GO:0016787//GO:0032553//GO:0016462//GO:0097159//GO:0019001//GO:0008135//GO:1901363//GO:0003676//GO:0003746//GO:0003824//GO:0017076//GO:0097367//GO:1901265//GO:0005488//GO:0032549//GO:0016817//GO:0043168//GO:0003924//GO:0003723//GO:0017111//GO:0032561//GO:0001882//GO:0000166//GO:0001883//GO:0005525	small molecule binding//hydrolase activity, acting on acid anhydrides, in phosphorus-containing anhydrides//molecular_function//ion binding//purine ribonucleotide binding//purine ribonucleoside triphosphate binding//purine ribonucleoside binding//hydrolase activity//ribonucleotide binding//pyrophosphatase activity//organic cyclic compound binding//guanyl nucleotide binding//translation factor act…	K03231 elongation factor 1-alpha | (RefSeq) elongation factor 1-alpha	http://www.genome.jp/dbget-bin/www_bget?sot:102600998	-	Translation elongation factor EF1A, eukaryotic/archaeal||Translation protein, beta-barrel domain||Translation elongation factor EF1A/initiation factor IF2gamma, C-terminal||Tr-type G domain, conserved site||Translation elongation factor EFTu/EF1A, C-terminal||Translation elongation factor EFTu-like, domain 2||P-loop containing nucleoside triphosphate hydrolase||Transcription factor, GTP-binding d…
462	PGSC0003DMG400023306	90.5843	28.1739	1.6849	0.0078726	0.04781	UP	--	--	--	--	--	--	no KO assigned | (RefSeq) protein CMSS1-like	http://www.genome.jp/dbget-bin/www_bget?sot:102594115	-	Protein Cms1
463	PGSC0003DMG400023329	3197.22	1253.33	1.3511	9.9011e-08	4.2671e-06	UP	GO:0044260//GO:0071704//GO:0006793//GO:0008152//GO:0006796//GO:0009987//GO:0008150//GO:0043412//GO:0006464//GO:0043170//GO:0016310//GO:0044237//GO:0019538//GO:0006468//GO:0044238//GO:0036211//GO:0044267	cellular macromolecule metabolic process//organic substance metabolic process//phosphorus metabolic process//metabolic process//phosphate-containing compound metabolic process//cellular process//biological_process//macromolecule modification//cellular protein modification process//macromolecule metabolic process//phosphorylation//cellular metabolic process//protein metabolic process//protein phos…	GO:0005575//GO:0016020//GO:0016021//GO:0044425//GO:0031224	cellular_component//membrane//integral component of membrane//membrane part//intrinsic component of membrane	GO:0003674//GO:0036094//GO:0043167//GO:0035639//GO:0032555//GO:0032550//GO:0016301//GO:0032553//GO:0005524//GO:0097159//GO:0016740//GO:1901363//GO:0003824//GO:0030554//GO:0017076//GO:0097367//GO:1901265//GO:0005488//GO:0032549//GO:0032559//GO:0043168//GO:0016773//GO:0004674//GO:0004672//GO:0001882//GO:0016772//GO:0000166//GO:0001883	molecular_function//small molecule binding//ion binding//purine ribonucleoside triphosphate binding//purine ribonucleotide binding//purine ribonucleoside binding//kinase activity//ribonucleotide binding//ATP binding//organic cyclic compound binding//transferase activity//heterocyclic compound binding//catalytic activity//adenyl nucleotide binding//purine nucleotide binding//carbohydrate derivativ…	no KO assigned | (RefSeq) probable LRR receptor-like serine/threonine-protein kinase At5g63710	http://www.genome.jp/dbget-bin/www_bget?sot:102604943	-	Protein kinase-like domain||Leucine-rich repeat domain, L domain-like||Serine/threonine-protein kinase, active site||Protein kinase domain||Leucine-rich repeat-containing N-terminal, plant-type||Leucine-rich repeat||Protein kinase, ATP binding site
464	PGSC0003DMG400023344	1283.83	530.821	1.2742	3.3687e-06	8.9719e-05	UP	GO:0019538//GO:0036211//GO:0044238//GO:0019684//GO:0018298//GO:0044267//GO:0006091//GO:0006464//GO:0043170//GO:0044237//GO:0009987//GO:0008150//GO:0043412//GO:0009765//GO:0044260//GO:0071704//GO:0008152//GO:0015979	protein metabolic process//protein modification process//primary metabolic process//photosynthesis, light reaction//protein-chromophore linkage//cellular protein metabolic process//generation of precursor metabolites and energy//cellular protein modification process//macromolecule metabolic process//cellular metabolic process//cellular process//biological_process//macromolecule modification//phot…	GO:0005622//GO:0031224//GO:0044464//GO:0044434//GO:0009523//GO:0009522//GO:0009534//GO:0005623//GO:0044444//GO:0009521//GO:0043229//GO:0044446//GO:0044422//GO:0016021//GO:0009535//GO:0044435//GO:0042651//GO:0044425//GO:0044424//GO:0055035//GO:0034357//GO:0009579//GO:0043226//GO:0031976//GO:0098796//GO:0044436//GO:0009536//GO:0043231//GO:0005575//GO:0043227//GO:0016020//GO:0031984//GO:0032991//GO:…	intracellular//intrinsic component of membrane//cell part//chloroplast part//photosystem II//photosystem I//chloroplast thylakoid//cell//cytoplasmic part//photosystem//intracellular organelle//intracellular organelle part//organelle part//integral component of membrane//chloroplast thylakoid membrane//plastid part//thylakoid membrane//membrane part//intracellular part//plastid thylakoid membrane/…	GO:0005488//GO:0097159//GO:1901363//GO:0003674//GO:0016168//GO:0046906	binding//organic cyclic compound binding//heterocyclic compound binding//molecular_function//chlorophyll binding//tetrapyrrole binding	K08907 light-harvesting complex I chlorophyll a/b binding protein 1 | (RefSeq) chlorophyll a-b binding protein 6A, chloroplastic-like	http://www.genome.jp/dbget-bin/www_bget?sot:102587257	-	Chlorophyll A-B binding protein, plant||Chlorophyll A-B binding protein||Chlorophyll a/b binding protein domain
465	PGSC0003DMG400023449	25.0129	1.08531	4.5265	0.0023391	0.019099	UP	--	--	--	--	--	--	no KO assigned | (RefSeq) uncharacterized LOC102589757	http://www.genome.jp/dbget-bin/www_bget?sot:102589757	--	--
466	PGSC0003DMG400023587	27.6507	0.979604	4.819	0.0010598	0.010255	UP	GO:0044267//GO:0044238//GO:0006468//GO:0036211//GO:0019538//GO:0044237//GO:0043170//GO:0016310//GO:0006464//GO:0043412//GO:0008150//GO:0009987//GO:0006796//GO:0008152//GO:0006793//GO:0071704//GO:0044260	cellular protein metabolic process//primary metabolic process//protein phosphorylation//protein modification process//protein metabolic process//cellular metabolic process//macromolecule metabolic process//phosphorylation//cellular protein modification process//macromolecule modification//biological_process//cellular process//phosphate-containing compound metabolic process//metabolic process//pho…	GO:0031224//GO:0044425//GO:0016021//GO:0016020//GO:0005575	intrinsic component of membrane//membrane part//integral component of membrane//membrane//cellular_component	GO:0000166//GO:0001883//GO:0004672//GO:0001882//GO:0016772//GO:0004674//GO:0016773//GO:0043168//GO:0005488//GO:0032559//GO:0032549//GO:0097367//GO:1901265//GO:0017076//GO:1901363//GO:0030554//GO:0003824//GO:0016740//GO:0097159//GO:0016301//GO:0032553//GO:0005524//GO:0035639//GO:0032555//GO:0032550//GO:0043167//GO:0003674//GO:0036094	nucleotide binding//purine nucleoside binding//protein kinase activity//nucleoside binding//transferase activity, transferring phosphorus-containing groups//protein serine/threonine kinase activity//phosphotransferase activity, alcohol group as acceptor//anion binding//binding//adenyl ribonucleotide binding//ribonucleoside binding//carbohydrate derivative binding//nucleoside phosphate binding//pu…	K13420 LRR receptor-like serine/threonine-protein kinase FLS2 [EC:2.7.11.1] | (RefSeq) probable LRR receptor-like serine/threonine-protein kinase At3g47570	http://www.genome.jp/dbget-bin/www_bget?sot:102579850	-	Leucine-rich repeat-containing N-terminal, plant-type||Protein kinase domain||Leucine-rich repeat domain, L domain-like||Leucine-rich repeat, typical subtype||Serine/threonine-protein kinase, active site||Protein kinase, ATP binding site||Leucine-rich repeat||Protein kinase-like domain
467	PGSC0003DMG400023618	544.741	242.011	1.1705	0.00021879	0.0028916	UP	--	--	--	--	GO:0005488//GO:0003674//GO:0003676//GO:1901363//GO:0097159	binding//molecular_function//nucleic acid binding//heterocyclic compound binding//organic cyclic compound binding	no KO assigned | (RefSeq) zinc finger protein 4-like	http://www.genome.jp/dbget-bin/www_bget?sot:102595753	-	Zinc finger C2H2-type
468	PGSC0003DMG400023680	548.52	198.685	1.4651	0.0066848	0.042359	UP	--	--	GO:0016020//GO:0005575//GO:0044425//GO:0016021//GO:0031224	membrane//cellular_component//membrane part//integral component of membrane//intrinsic component of membrane	--	--	--	--	--	--
469	PGSC0003DMG400023753	667.796	318.284	1.0691	0.00052881	0.0058601	UP	--	--	--	--	--	--	no KO assigned | (RefSeq) probable plastid-lipid-associated protein 4, chloroplastic	http://www.genome.jp/dbget-bin/www_bget?sot:102603173	-	Plastid lipid-associated protein/fibrillin conserved domain
470	PGSC0003DMG400023802	294.551	111.024	1.4077	0.00019725	0.002655	UP	GO:0044238//GO:0046483//GO:0090304//GO:0016043//GO:0006996//GO:0071840//GO:0006807//GO:0009058//GO:0050896//GO:0034641//GO:0071103//GO:0006259//GO:0043170//GO:0009059//GO:0044237//GO:0051716//GO:0006950//GO:0006974//GO:0006139//GO:1901360//GO:0009987//GO:0006281//GO:0006260//GO:0033554//GO:0044249//GO:0008150//GO:0032508//GO:0071704//GO:0034645//GO:0032392//GO:0006725//GO:1901576//GO:0044260//GO:…	primary metabolic process//heterocycle metabolic process//nucleic acid metabolic process//cellular component organization//organelle organization//cellular component organization or biogenesis//nitrogen compound metabolic process//biosynthetic process//response to stimulus//cellular nitrogen compound metabolic process//DNA conformation change//DNA metabolic process//macromolecule metabolic proces…	GO:0044464//GO:0005622//GO:0005623//GO:0005575	cell part//intracellular//cell//cellular_component	GO:0003678//GO:0017111//GO:0000166//GO:0016887//GO:1901265//GO:0004003//GO:0005488//GO:0042623//GO:0043140//GO:0016817//GO:0008094//GO:0008026//GO:0016462//GO:0004386//GO:0097159//GO:0003676//GO:1901363//GO:0003824//GO:0070035//GO:0043138//GO:0003674//GO:0016818//GO:0036094//GO:0016787	DNA helicase activity//nucleoside-triphosphatase activity//nucleotide binding//ATPase activity//nucleoside phosphate binding//ATP-dependent DNA helicase activity//binding//ATPase activity, coupled//ATP-dependent 3'-5' DNA helicase activity//hydrolase activity, acting on acid anhydrides//DNA-dependent ATPase activity//ATP-dependent helicase activity//pyrophosphatase activity//helicase activity//or…	K10901 bloom syndrome protein [EC:3.6.4.12] | (RefSeq) ATP-dependent DNA helicase Q-like 4A	http://www.genome.jp/dbget-bin/www_bget?sot:102601604	-	HRDC-like||HRDC domain||RQC domain||Winged helix-turn-helix DNA-binding domain
471	PGSC0003DMG400023807	67.0821	13.5477	2.3079	0.0022177	0.018333	UP	--	--	--	--	--	--	--	--	--	--
472	PGSC0003DMG400023922	550.534	260.77	1.0781	0.0003933	0.0046239	UP	--	--	GO:0005575//GO:0005576	cellular_component//extracellular region	--	--	K13449 pathogenesis-related protein 1 | (RefSeq) PR1B, pr1-1; pathogenesis-related protein 1b precursor	http://www.genome.jp/dbget-bin/www_bget?sot:102577780	-	Allergen V5/Tpx-1-related, conserved site||Cysteine-rich secretory protein, allergen V5/Tpx-1-related||CAP domain||Pathogenesis-related protein 1-like, SCP domain
473	PGSC0003DMG400023930	78.2114	16.2666	2.2655	0.0036972	0.027056	UP	GO:0016192//GO:0051179//GO:0051649//GO:0051641//GO:0009987//GO:0032940//GO:0046903//GO:0006887//GO:0006810//GO:0051234//GO:0008150	vesicle-mediated transport//localization//establishment of localization in cell//cellular localization//cellular process//secretion by cell//secretion//exocytosis//transport//establishment of localization//biological_process	GO:0000145//GO:0044424//GO:0044464//GO:0005622//GO:0044444//GO:0005623//GO:0005938//GO:0044448//GO:0032991//GO:0005575//GO:0005737//GO:0071944	exocyst//intracellular part//cell part//intracellular//cytoplasmic part//cell//cell cortex//cell cortex part//protein-containing complex//cellular_component//cytoplasm//cell periphery	--	--	K07195 exocyst complex component 7 | (RefSeq) exocyst complex component EXO70B1-like	http://www.genome.jp/dbget-bin/www_bget?sot:102581054	-	Cullin repeat-like-containing domain||Exocyst complex component Exo70
474	PGSC0003DMG400024209	1225.97	598.787	1.0338	0.00016396	0.0022905	UP	GO:0008150//GO:0043412//GO:0006796//GO:0009987//GO:0006793//GO:0008152//GO:0044260//GO:0071704//GO:0044267//GO:0019538//GO:0044238//GO:0006468//GO:0036211//GO:0044237//GO:0006464//GO:0043170//GO:0016310	biological_process//macromolecule modification//phosphate-containing compound metabolic process//cellular process//phosphorus metabolic process//metabolic process//cellular macromolecule metabolic process//organic substance metabolic process//cellular protein metabolic process//protein metabolic process//primary metabolic process//protein phosphorylation//protein modification process//cellular me…	--	--	GO:0016740//GO:1901363//GO:0030554//GO:0003824//GO:0097159//GO:0035639//GO:0032555//GO:0032550//GO:0016301//GO:0032553//GO:0005524//GO:0003674//GO:0036094//GO:0043167//GO:0004672//GO:0001882//GO:0016772//GO:0000166//GO:0001883//GO:0016773//GO:0005488//GO:0032559//GO:0032549//GO:0043168//GO:0017076//GO:0097367//GO:1901265	transferase activity//heterocyclic compound binding//adenyl nucleotide binding//catalytic activity//organic cyclic compound binding//purine ribonucleoside triphosphate binding//purine ribonucleotide binding//purine ribonucleoside binding//kinase activity//ribonucleotide binding//ATP binding//molecular_function//small molecule binding//ion binding//protein kinase activity//nucleoside binding//tran…	K08869 aarF domain-containing kinase | (RefSeq) uncharacterized protein slr0889-like	http://www.genome.jp/dbget-bin/www_bget?sot:102594574	-	UbiB domain||Protein kinase domain||Protein kinase-like domain
475	PGSC0003DMG400024231	273.796	94.5901	1.5333	0.0067306	0.042587	UP	--	--	--	--	GO:0043167//GO:0003674//GO:0036094//GO:0032553//GO:0043531//GO:0032555//GO:0032550//GO:0097159//GO:1901363//GO:0030554//GO:0097367//GO:1901265//GO:0017076//GO:0043168//GO:0005488//GO:0032549//GO:0032559//GO:0000166//GO:0001883//GO:0001882	ion binding//molecular_function//small molecule binding//ribonucleotide binding//ADP binding//purine ribonucleotide binding//purine ribonucleoside binding//organic cyclic compound binding//heterocyclic compound binding//adenyl nucleotide binding//carbohydrate derivative binding//nucleoside phosphate binding//purine nucleotide binding//anion binding//binding//ribonucleoside binding//adenyl ribonuc…	no KO assigned | (RefSeq) disease resistance protein RPP13-like	http://www.genome.jp/dbget-bin/www_bget?sot:102584994	-	Winged helix-turn-helix DNA-binding domain||P-loop containing nucleoside triphosphate hydrolase||NB-ARC
476	PGSC0003DMG400024308	463.033	180.232	1.3613	4.5287e-05	0.00079303	UP	--	--	GO:0016020//GO:0005575//GO:0031224//GO:0044425//GO:0016021	membrane//cellular_component//intrinsic component of membrane//membrane part//integral component of membrane	--	--	K03301 ATP:ADP antiporter, AAA family | (RefSeq) uncharacterized LOC102589317	http://www.genome.jp/dbget-bin/www_bget?sot:102589317	--	--
477	PGSC0003DMG400024437	80.0771	22.0919	1.8579	0.0048261	0.03334	UP	--	--	GO:0016020//GO:0005575//GO:0044425//GO:0016021//GO:0031224	membrane//cellular_component//membrane part//integral component of membrane//intrinsic component of membrane	--	--	no KO assigned | (RefSeq) receptor-like protein 12	http://www.genome.jp/dbget-bin/www_bget?sot:102589525	-	Leucine-rich repeat domain, L domain-like||Leucine-rich repeat
478	PGSC0003DMG400024438	832.59	321.462	1.373	3.0262e-06	8.1689e-05	UP	--	--	--	--	--	--	no KO assigned | (RefSeq) receptor-like protein 12	http://www.genome.jp/dbget-bin/www_bget?sot:102589525	-	Leucine-rich repeat||Leucine-rich repeat, typical subtype||Leucine-rich repeat domain, L domain-like
479	PGSC0003DMG400024498	2078.25	753.769	1.4632	0.0059483	0.038912	UP	--	--	GO:0044425//GO:0016021//GO:0005623//GO:0044464//GO:0031224//GO:0071944//GO:0005886//GO:0016020//GO:0005575	membrane part//integral component of membrane//cell//cell part//intrinsic component of membrane//cell periphery//plasma membrane//membrane//cellular_component	--	--	no KO assigned | (RefSeq) CASP-like protein 4A3	http://www.genome.jp/dbget-bin/www_bget?sot:102594755	-	Domain of unknown function DUF588
480	PGSC0003DMG400024500	169.167	25.2926	2.7417	7.3665e-05	0.0011981	UP	GO:0008150//GO:0043412//GO:0006796//GO:0009987//GO:0006793//GO:0008152//GO:0044260//GO:0071704//GO:0044267//GO:0019538//GO:0036211//GO:0006468//GO:0044238//GO:0044237//GO:0006464//GO:0016310//GO:0043170	biological_process//macromolecule modification//phosphate-containing compound metabolic process//cellular process//phosphorus metabolic process//metabolic process//cellular macromolecule metabolic process//organic substance metabolic process//cellular protein metabolic process//protein metabolic process//protein modification process//protein phosphorylation//primary metabolic process//cellular me…	--	--	GO:0016740//GO:0030554//GO:0003824//GO:1901363//GO:0097159//GO:0032550//GO:0032555//GO:0035639//GO:0005524//GO:0032553//GO:0016301//GO:0036094//GO:0003674//GO:0043167//GO:0016772//GO:0001882//GO:0004672//GO:0001883//GO:0000166//GO:0016773//GO:0032559//GO:0032549//GO:0005488//GO:0043168//GO:0017076//GO:1901265//GO:0097367	transferase activity//adenyl nucleotide binding//catalytic activity//heterocyclic compound binding//organic cyclic compound binding//purine ribonucleoside binding//purine ribonucleotide binding//purine ribonucleoside triphosphate binding//ATP binding//ribonucleotide binding//kinase activity//small molecule binding//molecular_function//ion binding//transferase activity, transferring phosphorus-con…	no KO assigned | (RefSeq) serine/threonine-protein kinase HT1-like	http://www.genome.jp/dbget-bin/www_bget?sot:102595845	-	Serine/threonine-protein kinase, active site||Protein kinase domain||Protein kinase-like domain||Serine-threonine/tyrosine-protein kinase, catalytic domain
481	PGSC0003DMG400024564	333.193	154.48	1.1089	0.001296	0.012012	UP	--	--	--	--	--	--	no KO assigned | (RefSeq) uncharacterized LOC102597828	http://www.genome.jp/dbget-bin/www_bget?sot:102597828	--	--
482	PGSC0003DMG400024622	73.4509	7.28314	3.3341	0.0037338	0.027256	UP	--	--	--	--	GO:0003674//GO:0016782//GO:0008146//GO:0016740//GO:0003824	molecular_function//transferase activity, transferring sulfur-containing groups//sulfotransferase activity//transferase activity//catalytic activity	K01025 [EC:2.8.2.-] | (RefSeq) cytosolic sulfotransferase 12-like	http://www.genome.jp/dbget-bin/www_bget?sot:102603057	-	Sulfotransferase domain||P-loop containing nucleoside triphosphate hydrolase
483	PGSC0003DMG400024655	192.664	87.408	1.1403	0.006559	0.041783	UP	--	--	--	--	--	--	no KO assigned | (RefSeq) DNA annealing helicase and endonuclease ZRANB3	http://www.genome.jp/dbget-bin/www_bget?sot:102603029	--	--
484	PGSC0003DMG400024770	2217.57	86.4133	4.6816	9.3879e-09	5.4101e-07	UP	--	--	--	--	--	--	no KO assigned | (RefSeq) F-box protein PP2-B15-like	http://www.genome.jp/dbget-bin/www_bget?sot:102588000	-	F-box domain||Phloem protein 2-like
485	PGSC0003DMG400024890	1240.99	329.55	1.9129	0.00043999	0.0050522	UP	GO:0044260//GO:0071704//GO:0006793//GO:0008152//GO:0006796//GO:0009987//GO:0008150//GO:0043412//GO:0006464//GO:0016310//GO:0043170//GO:0044237//GO:0019538//GO:0036211//GO:0006468//GO:0044238//GO:0044267	cellular macromolecule metabolic process//organic substance metabolic process//phosphorus metabolic process//metabolic process//phosphate-containing compound metabolic process//cellular process//biological_process//macromolecule modification//cellular protein modification process//phosphorylation//macromolecule metabolic process//cellular metabolic process//protein metabolic process//protein modi…	GO:0005575//GO:0016020//GO:0016021//GO:0044425//GO:0031224	cellular_component//membrane//integral component of membrane//membrane part//intrinsic component of membrane	GO:0036094//GO:0003674//GO:0043167//GO:0032550//GO:0032555//GO:0035639//GO:0005524//GO:0032553//GO:0016301//GO:0097159//GO:0016740//GO:0003824//GO:0030554//GO:1901363//GO:0017076//GO:1901265//GO:0097367//GO:0032549//GO:0032559//GO:0005488//GO:0043168//GO:0016773//GO:0016772//GO:0001882//GO:0004672//GO:0001883//GO:0000166	small molecule binding//molecular_function//ion binding//purine ribonucleoside binding//purine ribonucleotide binding//purine ribonucleoside triphosphate binding//ATP binding//ribonucleotide binding//kinase activity//organic cyclic compound binding//transferase activity//catalytic activity//adenyl nucleotide binding//heterocyclic compound binding//purine nucleotide binding//nucleoside phosphate b…	no KO assigned | (RefSeq) leucine-rich repeat receptor-like serine/threonine-protein kinase BAM3	http://www.genome.jp/dbget-bin/www_bget?sot:102590655	-	Leucine-rich repeat-containing N-terminal, plant-type||Protein kinase domain||Leucine-rich repeat domain, L domain-like||Leucine-rich repeat, typical subtype||Serine/threonine-protein kinase, active site||Leucine-rich repeat||Protein kinase-like domain||Serine-threonine/tyrosine-protein kinase, catalytic domain
486	PGSC0003DMG400024933	380.943	174.173	1.1291	0.0030672	0.023444	UP	--	--	--	--	--	--	no KO assigned | (RefSeq) BTB/POZ domain-containing protein NPY3	http://www.genome.jp/dbget-bin/www_bget?sot:102589934	-	NPH3 domain||SKP1/BTB/POZ domain||BTB/POZ domain
487	PGSC0003DMG400024946	237.123	80.4039	1.5603	0.00015325	0.0021734	UP	GO:0007275//GO:0044238//GO:0046483//GO:0008299//GO:0009058//GO:0018130//GO:0010346//GO:1901600//GO:0001763//GO:0006629//GO:0044255//GO:1901334//GO:0032501//GO:0006721//GO:0016114//GO:0044237//GO:0010223//GO:0048646//GO:1901601//GO:1901360//GO:0048856//GO:0009987//GO:0006720//GO:1901362//GO:0006714//GO:0048367//GO:0032502//GO:0008610//GO:0009653//GO:1901336//GO:0044249//GO:0048731//GO:0010016//GO:…	multicellular organism development//primary metabolic process//heterocycle metabolic process//isoprenoid biosynthetic process//biosynthetic process//heterocycle biosynthetic process//shoot axis formation//strigolactone metabolic process//morphogenesis of a branching structure//lipid metabolic process//cellular lipid metabolic process//lactone metabolic process//multicellular organismal process//t…	--	--	--	--	no KO assigned | (RefSeq) probable esterase KAI2	http://www.genome.jp/dbget-bin/www_bget?sot:102598217	-	Alpha/Beta hydrolase fold||Strigolactone esterase D14 family||Alpha/beta hydrolase fold-1
488	PGSC0003DMG400024964	189.29	76.5866	1.3054	0.0035531	0.026259	UP	--	--	--	--	GO:0016410//GO:0016407//GO:0008080//GO:0003674//GO:0016746//GO:0016747//GO:0016740//GO:0003824	N-acyltransferase activity//acetyltransferase activity//N-acetyltransferase activity//molecular_function//transferase activity, transferring acyl groups//transferase activity, transferring acyl groups other than amino-acyl groups//transferase activity//catalytic activity	no KO assigned | (RefSeq) probable N-acetyltransferase HLS1	http://www.genome.jp/dbget-bin/www_bget?sot:102591170	-	Acyl-CoA N-acyltransferase||GNAT domain
489	PGSC0003DMG400025063	2043.74	454.176	2.1699	0.00019298	0.0026082	UP	GO:0006022//GO:0005975//GO:0044260//GO:0071704//GO:0044036//GO:0008152//GO:1901565//GO:0009056//GO:0044248//GO:0009057//GO:0009987//GO:1901072//GO:1901564//GO:0008150//GO:0046348//GO:0006040//GO:1901136//GO:0016998//GO:0043170//GO:0006032//GO:0006026//GO:0044237//GO:1901071//GO:0006807//GO:0006030//GO:1901575//GO:0071554//GO:0044238//GO:1901135	aminoglycan metabolic process//carbohydrate metabolic process//cellular macromolecule metabolic process//organic substance metabolic process//cell wall macromolecule metabolic process//metabolic process//organonitrogen compound catabolic process//catabolic process//cellular catabolic process//macromolecule catabolic process//cellular process//glucosamine-containing compound catabolic process//org…	--	--	GO:0003674//GO:0016787//GO:0004553//GO:0008061//GO:0004568//GO:0003824//GO:0097367//GO:0016798//GO:0005488	molecular_function//hydrolase activity//hydrolase activity, hydrolyzing O-glycosyl compounds//chitin binding//chitinase activity//catalytic activity//carbohydrate derivative binding//hydrolase activity, acting on glycosyl bonds//binding	K01183 chitinase [EC:3.2.1.14] | (RefSeq) endochitinase EP3	http://www.genome.jp/dbget-bin/www_bget?sot:102583127	-	Chitin-binding, type 1, conserved site||Glycoside hydrolase, family 19||Lysozyme-like domain||Glycoside hydrolase, family 19, catalytic||Chitin-binding, type 1
490	PGSC0003DMG400025079	429.83	181.314	1.2453	0.00021548	0.0028554	UP	--	--	--	--	GO:0043167//GO:0003674//GO:0036094//GO:0016818//GO:0032553//GO:0035639//GO:0032555//GO:0032550//GO:0016787//GO:0016462//GO:0097159//GO:1901363//GO:0003824//GO:0019001//GO:0097367//GO:1901265//GO:0017076//GO:0003924//GO:0043168//GO:0005488//GO:0032549//GO:0016817//GO:0032561//GO:0017111//GO:0000166//GO:0005525//GO:0001883//GO:0001882	ion binding//molecular_function//small molecule binding//hydrolase activity, acting on acid anhydrides, in phosphorus-containing anhydrides//ribonucleotide binding//purine ribonucleoside triphosphate binding//purine ribonucleotide binding//purine ribonucleoside binding//hydrolase activity//pyrophosphatase activity//organic cyclic compound binding//heterocyclic compound binding//catalytic activity…	K14754 interferon-induced GTP-binding protein Mx1 | (RefSeq) dynamin-related protein 4C-like	http://www.genome.jp/dbget-bin/www_bget?sot:102581679	-	Dynamin GTPase effector||Dynamin-type guanine nucleotide-binding (G) domain||Dynamin superfamily||Dynamin, GTPase domain||P-loop containing nucleoside triphosphate hydrolase||Dynamin central domain||GTPase effector domain
491	PGSC0003DMG400025109	4310.44	1749.01	1.3013	7.6144e-08	3.4093e-06	UP	--	--	--	--	--	--	--	--	--	--
492	PGSC0003DMG400025440	115.295	7.65149	3.9134	1.347e-05	0.00029429	UP	--	--	--	--	--	--	--	--	-	VQ
493	PGSC0003DMG400025444	56.8914	8.1027	2.8117	0.00076878	0.0079043	UP	--	--	--	--	--	--	--	--	--	--
494	PGSC0003DMG400025445	141.032	25.7326	2.4544	4.1139e-06	0.00010672	UP	--	--	--	--	--	--	--	--	--	--
495	PGSC0003DMG400025452	52.7679	3.71036	3.83	0.00028254	0.0035536	UP	--	--	--	--	--	--	--	--	--	--
496	PGSC0003DMG400025454	302.755	68.2416	2.1494	0.0068398	0.043104	UP	--	--	--	--	--	--	--	--	--	--
497	PGSC0003DMG400025480	2534.3	672.82	1.9133	0.00014599	0.0020862	UP	--	--	--	--	--	--	no KO assigned | (RefSeq) uncharacterized protein At4g06744-like	http://www.genome.jp/dbget-bin/www_bget?sot:102601766	-	Leucine-rich repeat domain, L domain-like
498	PGSC0003DMG400025558	158.188	48.4839	1.7061	0.0004796	0.0054335	UP	GO:0008150//GO:0043412//GO:0006796//GO:0009987//GO:0006793//GO:0008152//GO:0044260//GO:0071704//GO:0044267//GO:0019538//GO:0036211//GO:0006468//GO:0044238//GO:0044237//GO:0006464//GO:0043170//GO:0016310	biological_process//macromolecule modification//phosphate-containing compound metabolic process//cellular process//phosphorus metabolic process//metabolic process//cellular macromolecule metabolic process//organic substance metabolic process//cellular protein metabolic process//protein metabolic process//protein modification process//protein phosphorylation//primary metabolic process//cellular me…	--	--	GO:0016740//GO:1901363//GO:0003824//GO:0030554//GO:0097159//GO:0032555//GO:0035639//GO:0032550//GO:0016301//GO:0005524//GO:0032553//GO:0036094//GO:0003674//GO:0043167//GO:0004672//GO:0016772//GO:0001882//GO:0000166//GO:0001883//GO:0016773//GO:0004674//GO:0005488//GO:0032549//GO:0032559//GO:0043168//GO:0017076//GO:0097367//GO:1901265	transferase activity//heterocyclic compound binding//catalytic activity//adenyl nucleotide binding//organic cyclic compound binding//purine ribonucleotide binding//purine ribonucleoside triphosphate binding//purine ribonucleoside binding//kinase activity//ATP binding//ribonucleotide binding//small molecule binding//molecular_function//ion binding//protein kinase activity//transferase activity, tr…	no KO assigned | (RefSeq) G-type lectin S-receptor-like serine/threonine-protein kinase RLK1	http://www.genome.jp/dbget-bin/www_bget?sot:102605532	-	Serine/threonine-protein kinase, active site||Protein kinase domain||Protein kinase, ATP binding site||Protein kinase-like domain
499	PGSC0003DMG400025725	1528.49	728.073	1.07	7.0032e-05	0.0011465	UP	--	--	--	--	--	--	no KO assigned | (RefSeq) uncharacterized LOC102583966	http://www.genome.jp/dbget-bin/www_bget?sot:102583966	-	Protein of unknown function DUF620
500	PGSC0003DMG400025734	906.444	347.191	1.3845	1.5563e-06	4.6782e-05	UP	GO:0009119//GO:1901135//GO:0019752//GO:0006091//GO:0072521//GO:0009116//GO:0006732//GO:0009259//GO:0009135//GO:0034641//GO:0019693//GO:0006165//GO:0046483//GO:0044238//GO:0046031//GO:0043436//GO:0009205//GO:0009167//GO:0009179//GO:0051186//GO:0006807//GO:0009150//GO:1901575//GO:0044237//GO:0072524//GO:1901360//GO:0006139//GO:0042278//GO:0006753//GO:0016310//GO:0006096//GO:0019362//GO:0009161//GO:…	ribonucleoside metabolic process//carbohydrate derivative metabolic process//carboxylic acid metabolic process//generation of precursor metabolites and energy//purine-containing compound metabolic process//nucleoside metabolic process//coenzyme metabolic process//ribonucleotide metabolic process//purine nucleoside diphosphate metabolic process//cellular nitrogen compound metabolic process//ribose…	--	--	GO:0031420//GO:0016772//GO:0043169//GO:0030955//GO:0016773//GO:0005488//GO:0046872//GO:0004743//GO:0003824//GO:0016740//GO:0016301//GO:0000287//GO:0043167//GO:0003674	alkali metal ion binding//transferase activity, transferring phosphorus-containing groups//cation binding//potassium ion binding//phosphotransferase activity, alcohol group as acceptor//binding//metal ion binding//pyruvate kinase activity//catalytic activity//transferase activity//kinase activity//magnesium ion binding//ion binding//molecular_function	K00873 pyruvate kinase [EC:2.7.1.40] | (RefSeq) pyruvate kinase isozyme A, chloroplastic-like	http://www.genome.jp/dbget-bin/www_bget?sot:102604947	PKP1	Pyruvate/Phosphoenolpyruvate kinase-like domain||Pyruvate kinase, C-terminal||Pyruvate kinase||Pyruvate kinase-like, insert domain||Pyruvate kinase, barrel||Pyruvate kinase, active site
501	PGSC0003DMG400025854	784.891	285.951	1.4567	1.6277e-06	4.8536e-05	UP	--	--	--	--	--	--	no KO assigned | (RefSeq) uncharacterized LOC102594434	http://www.genome.jp/dbget-bin/www_bget?sot:102594434	-	Protein of unknown function DUF620
502	PGSC0003DMG400025872	469.968	169.4	1.4721	6.6987e-06	0.00016197	UP	GO:0008152//GO:0008150	metabolic process//biological_process	--	--	GO:0016758//GO:0016757//GO:0003674//GO:0003824//GO:0016740	transferase activity, transferring hexosyl groups//transferase activity, transferring glycosyl groups//molecular_function//catalytic activity//transferase activity	no KO assigned | (RefSeq) uncharacterized LOC102601371	http://www.genome.jp/dbget-bin/www_bget?sot:102601371	-	UDP-glucuronosyl/UDP-glucosyltransferase||UDP-glycosyltransferase family, conserved site
503	PGSC0003DMG400025873	791.99	290.307	1.4479	5.7024e-07	1.9381e-05	UP	GO:0008150//GO:0008152	biological_process//metabolic process	--	--	GO:0016758//GO:0016740//GO:0003824//GO:0003674//GO:0016757	transferase activity, transferring hexosyl groups//transferase activity//catalytic activity//molecular_function//transferase activity, transferring glycosyl groups	no KO assigned | (RefSeq) scopoletin glucosyltransferase-like	http://www.genome.jp/dbget-bin/www_bget?sot:102582507	-	UDP-glucuronosyl/UDP-glucosyltransferase||UDP-glycosyltransferase family, conserved site
504	PGSC0003DMG400025874	1137.54	459.072	1.3091	1.5454e-06	4.6534e-05	UP	GO:0008150//GO:0008152	biological_process//metabolic process	--	--	GO:0003824//GO:0016740//GO:0003674//GO:0016757//GO:0016758	catalytic activity//transferase activity//molecular_function//transferase activity, transferring glycosyl groups//transferase activity, transferring hexosyl groups	no KO assigned | (RefSeq) scopoletin glucosyltransferase-like	http://www.genome.jp/dbget-bin/www_bget?sot:102582853	-	UDP-glucuronosyl/UDP-glucosyltransferase||UDP-glycosyltransferase family, conserved site
505	PGSC0003DMG400026052	397.206	149.784	1.407	0.0028723	0.022297	UP	GO:0009987//GO:0006796//GO:0043412//GO:0008150//GO:0071704//GO:0044260//GO:0008152//GO:0006793//GO:0044238//GO:0006468//GO:0036211//GO:0019538//GO:0044267//GO:0043170//GO:0016310//GO:0006464//GO:0044237	cellular process//phosphate-containing compound metabolic process//macromolecule modification//biological_process//organic substance metabolic process//cellular macromolecule metabolic process//metabolic process//phosphorus metabolic process//primary metabolic process//protein phosphorylation//protein modification process//protein metabolic process//cellular protein metabolic process//macromolecu…	--	--	GO:0097159//GO:1901363//GO:0003824//GO:0030554//GO:0016740//GO:0043167//GO:0003674//GO:0036094//GO:0016301//GO:0032553//GO:0005524//GO:0035639//GO:0032555//GO:0032550//GO:0016773//GO:0000166//GO:0001883//GO:0004672//GO:0001882//GO:0016772//GO:0097367//GO:1901265//GO:0017076//GO:0043168//GO:0005488//GO:0032549//GO:0032559	organic cyclic compound binding//heterocyclic compound binding//catalytic activity//adenyl nucleotide binding//transferase activity//ion binding//molecular_function//small molecule binding//kinase activity//ribonucleotide binding//ATP binding//purine ribonucleoside triphosphate binding//purine ribonucleotide binding//purine ribonucleoside binding//phosphotransferase activity, alcohol group as acc…	no KO assigned | (RefSeq) serine/threonine-protein kinase D6PK-like	http://www.genome.jp/dbget-bin/www_bget?sot:102599591	-	Serine/threonine-protein kinase, active site||Protein kinase domain||Protein kinase-like domain
506	PGSC0003DMG400026054	1012.66	176.53	2.5202	0.0018577	0.015939	UP	--	--	--	--	--	--	no KO assigned | (RefSeq) U-box domain-containing protein 35-like	http://www.genome.jp/dbget-bin/www_bget?sot:102600808	-	Rossmann-like alpha/beta/alpha sandwich fold
507	PGSC0003DMG400026081	9233.29	4261.34	1.1155	5.2086e-06	0.00013047	UP	--	--	--	--	GO:0005488//GO:0003674//GO:0097159//GO:1901363//GO:0003676	binding//molecular_function//organic cyclic compound binding//heterocyclic compound binding//nucleic acid binding	no KO assigned | (RefSeq) protein SENSITIVE TO PROTON RHIZOTOXICITY 1-like	http://www.genome.jp/dbget-bin/www_bget?sot:102596245	-	Zinc finger C2H2-type
508	PGSC0003DMG400026121	935.389	419.839	1.1557	0.00077054	0.0079142	UP	GO:0044237//GO:0009987//GO:0008150//GO:0008152//GO:0015979	cellular metabolic process//cellular process//biological_process//metabolic process//photosynthesis	GO:0044464//GO:0005622//GO:1990204//GO:0009534//GO:0005623//GO:0044444//GO:0009521//GO:0044434//GO:0009523//GO:0044435//GO:0043229//GO:0044446//GO:0044422//GO:0044425//GO:0044424//GO:0009654//GO:0042651//GO:0009532//GO:0043226//GO:0019898//GO:0034357//GO:0009579//GO:0044436//GO:0009536//GO:0031976//GO:0009570//GO:0098796//GO:0043227//GO:0016020//GO:0031984//GO:0032991//GO:0043231//GO:0005575//GO:…	cell part//intracellular//oxidoreductase complex//chloroplast thylakoid//cell//cytoplasmic part//photosystem//chloroplast part//photosystem II//plastid part//intracellular organelle//intracellular organelle part//organelle part//membrane part//intracellular part//photosystem II oxygen evolving complex//thylakoid membrane//plastid stroma//organelle//extrinsic component of membrane//photosynthetic …	GO:0043169//GO:0046872//GO:0005488//GO:0043167//GO:0003674//GO:0005509	cation binding//metal ion binding//binding//ion binding//molecular_function//calcium ion binding	no KO assigned | (RefSeq) psbP domain-containing protein 6, chloroplastic	http://www.genome.jp/dbget-bin/www_bget?sot:102597757	-	Mog1/PsbP, alpha/beta/alpha sandwich||PsbP family
509	PGSC0003DMG400026166	52.1064	8.53443	2.6101	0.0029283	0.022608	UP	GO:0000272//GO:0008150//GO:0009057//GO:0009056//GO:0008152//GO:0071704//GO:0005975//GO:0016052//GO:0005976//GO:0044238//GO:1901575//GO:0043170	polysaccharide catabolic process//biological_process//macromolecule catabolic process//catabolic process//metabolic process//organic substance metabolic process//carbohydrate metabolic process//carbohydrate catabolic process//polysaccharide metabolic process//primary metabolic process//organic substance catabolic process//macromolecule metabolic process	--	--	GO:0003824//GO:0016160//GO:0004553//GO:0016787//GO:0003674//GO:0016161//GO:0016798	catalytic activity//amylase activity//hydrolase activity, hydrolyzing O-glycosyl compounds//hydrolase activity//molecular_function//beta-amylase activity//hydrolase activity, acting on glycosyl bonds	no KO assigned | (RefSeq) beta-amylase-like	http://www.genome.jp/dbget-bin/www_bget?sot:102592633	-	Glycoside hydrolase, family 14B, plant||Glycoside hydrolase, family 14||Glycoside hydrolase superfamily
510	PGSC0003DMG400026189	3289.29	265.195	3.6327	4.3451e-12	5.3481e-10	UP	GO:0044237//GO:0044042//GO:0010411//GO:0043170//GO:0044085//GO:0071555//GO:0045229//GO:0071840//GO:0071554//GO:0016043//GO:0005976//GO:0006073//GO:0044238//GO:0044036//GO:0008152//GO:0044264//GO:0044260//GO:0005975//GO:0042546//GO:0044262//GO:0071704//GO:0008150//GO:0010383//GO:0010410//GO:0009987	cellular metabolic process//glucan metabolic process//xyloglucan metabolic process//macromolecule metabolic process//cellular component biogenesis//cell wall organization//external encapsulating structure organization//cellular component organization or biogenesis//cell wall organization or biogenesis//cellular component organization//polysaccharide metabolic process//cellular glucan metabolic pr…	GO:0030312//GO:0048046//GO:0005623//GO:0005618//GO:0005576//GO:0044464//GO:0071944//GO:0005575	external encapsulating structure//apoplast//cell//cell wall//extracellular region//cell part//cell periphery//cellular_component	GO:0016798//GO:0016758//GO:0016762//GO:0016787//GO:0004553//GO:0003674//GO:0016757//GO:0016740//GO:0003824	hydrolase activity, acting on glycosyl bonds//transferase activity, transferring hexosyl groups//xyloglucan:xyloglucosyl transferase activity//hydrolase activity//hydrolase activity, hydrolyzing O-glycosyl compounds//molecular_function//transferase activity, transferring glycosyl groups//transferase activity//catalytic activity	K08235 xyloglucan:xyloglucosyl transferase [EC:2.4.1.207] | (RefSeq) xyloglucan endotransglucosylase/hydrolase protein 9	http://www.genome.jp/dbget-bin/www_bget?sot:102603337	XTH9	Xyloglucan endotransglucosylase/hydrolase||Beta-glucanase||Glycoside hydrolase family 16||Concanavalin A-like lectin/glucanase domain||Xyloglucan endo-transglycosylase, C-terminal
511	PGSC0003DMG400026243	971.861	459.005	1.0822	0.00013513	0.0019524	UP	GO:0010135//GO:0044237//GO:1901360//GO:0006139//GO:0006145//GO:0044238//GO:0046483//GO:0043603//GO:0006807//GO:1901575//GO:1901361//GO:0072521//GO:0034641//GO:0010136//GO:0046113//GO:0071704//GO:0006725//GO:0055086//GO:0046700//GO:0019439//GO:0072523//GO:1901565//GO:0008152//GO:0006144//GO:0009987//GO:0044248//GO:0044281//GO:0000255//GO:0009056//GO:0009112//GO:0043605//GO:0044270//GO:0000256//GO:…	ureide metabolic process//cellular metabolic process//organic cyclic compound metabolic process//nucleobase-containing compound metabolic process//purine nucleobase catabolic process//primary metabolic process//heterocycle metabolic process//cellular amide metabolic process//nitrogen compound metabolic process//organic substance catabolic process//organic cyclic compound catabolic process//purine…	GO:0016021//GO:0044425//GO:0031224//GO:0016020//GO:0005575	integral component of membrane//membrane part//intrinsic component of membrane//membrane//cellular_component	GO:0071522//GO:0016813//GO:0003674//GO:0016787//GO:0003824//GO:0016810	ureidoglycine aminohydrolase activity//hydrolase activity, acting on carbon-nitrogen (but not peptide) bonds, in linear amidines//molecular_function//hydrolase activity//catalytic activity//hydrolase activity, acting on carbon-nitrogen (but not peptide) bonds	K14977 (S)-ureidoglycine aminohydrolase [EC:3.5.3.26] | (RefSeq) (S)-ureidoglycine aminohydrolase	http://www.genome.jp/dbget-bin/www_bget?sot:102579476	UGLYAH	Cupin 2, conserved barrel||RmlC-like jelly roll fold||RmlC-like cupin domain
512	PGSC0003DMG400026280	518.847	53.2296	3.285	0.0017098	0.014926	UP	GO:0008150//GO:0006082//GO:0009987//GO:0044281//GO:0008152//GO:0071704//GO:0019752//GO:0043436//GO:0044237	biological_process//organic acid metabolic process//cellular process//small molecule metabolic process//metabolic process//organic substance metabolic process//carboxylic acid metabolic process//oxoacid metabolic process//cellular metabolic process	--	--	GO:1901363//GO:0003824//GO:0097159//GO:0016831//GO:0016829//GO:0003674//GO:0030170//GO:0043167//GO:0016830//GO:0005488//GO:0043168//GO:0048037	heterocyclic compound binding//catalytic activity//organic cyclic compound binding//carboxy-lyase activity//lyase activity//molecular_function//pyridoxal phosphate binding//ion binding//carbon-carbon lyase activity//binding//anion binding//cofactor binding	K01590 histidine decarboxylase [EC:4.1.1.22] | (RefSeq) histidine decarboxylase-like	http://www.genome.jp/dbget-bin/www_bget?sot:102591703	-	Pyridoxal phosphate-dependent transferase, subdomain 2||Pyridoxal phosphate-dependent transferase, major region, subdomain 1||Pyridoxal phosphate-dependent decarboxylase||Pyridoxal-phosphate binding site||Pyridoxal phosphate-dependent transferase
513	PGSC0003DMG400026312	189.953	56.0873	1.7599	0.00014205	0.0020358	UP	GO:0009987//GO:0035235//GO:0050789//GO:0051234//GO:0006810//GO:0008150//GO:0023052//GO:0007215//GO:0007166//GO:0051179//GO:0007165//GO:0065007//GO:0050794//GO:0050896//GO:0007154//GO:0051716//GO:0006811	cellular process//ionotropic glutamate receptor signaling pathway//regulation of biological process//establishment of localization//transport//biological_process//signaling//glutamate receptor signaling pathway//cell surface receptor signaling pathway//localization//signal transduction//biological regulation//regulation of cellular process//response to stimulus//cell communication//cellular respo…	GO:0005575//GO:0016020//GO:0031224//GO:0016021//GO:0044425	cellular_component//membrane//intrinsic component of membrane//integral component of membrane//membrane part	GO:0005230//GO:0022803//GO:0022857//GO:0022836//GO:0003674//GO:0005216//GO:0038023//GO:0022834//GO:0015267//GO:0004970//GO:0005215//GO:0022838//GO:0060089//GO:0015276//GO:0008066//GO:0015075//GO:0004871//GO:0004888	extracellular ligand-gated ion channel activity//passive transmembrane transporter activity//transmembrane transporter activity//gated channel activity//molecular_function//ion channel activity//signaling receptor activity//ligand-gated channel activity//channel activity//ionotropic glutamate receptor activity//transporter activity//substrate-specific channel activity//molecular transducer activi…	K05387 glutamate receptor, ionotropic, plant | (RefSeq) glutamate receptor 2.3-like	http://www.genome.jp/dbget-bin/www_bget?sot:102600393	-	Solute-binding protein family 3/N-terminal domain of MltF||Receptor, ligand binding region||Ionotropic glutamate receptor, plant||Ionotropic glutamate receptor||Periplasmic binding protein-like I
514	PGSC0003DMG400026337	10817.6	4513.15	1.2612	1.6298e-07	6.6141e-06	UP	--	--	GO:0005575//GO:0016020//GO:0031224//GO:0044425//GO:0016021	cellular_component//membrane//intrinsic component of membrane//membrane part//integral component of membrane	--	--	--	--	--	--
515	PGSC0003DMG400026381	25.2973	0	Inf	0.00012021	0.0017781	UP	GO:0051179//GO:0033036//GO:0071702//GO:0010876//GO:0006869//GO:0008150//GO:0051234//GO:0006810	localization//macromolecule localization//organic substance transport//lipid localization//lipid transport//biological_process//establishment of localization//transport	--	--	--	--	--	--	-	Bifunctional inhibitor/plant lipid transfer protein/seed storage helical domain||Non-specific lipid-transfer protein type 2
516	PGSC0003DMG400026460	1844.04	753.038	1.2921	0.0072088	0.044881	UP	--	--	GO:0005623//GO:0044464//GO:0005622//GO:0005634//GO:0044424//GO:0043229//GO:0043226//GO:0043227//GO:0005575//GO:0043231	cell//cell part//intracellular//nucleus//intracellular part//intracellular organelle//organelle//membrane-bounded organelle//cellular_component//intracellular membrane-bounded organelle	GO:0003677//GO:0005488//GO:0003676//GO:1901363//GO:0097159//GO:0008289//GO:0003674	DNA binding//binding//nucleic acid binding//heterocyclic compound binding//organic cyclic compound binding//lipid binding//molecular_function	K09338 homeobox-leucine zipper protein | (RefSeq) homeobox-leucine zipper protein ATHB-15-like	http://www.genome.jp/dbget-bin/www_bget?sot:102595935	-	START domain||START-like domain||Homeobox domain||Homeobox domain-like||MEKHLA
517	PGSC0003DMG400026484	47.099	0.976377	5.5921	0.001811	0.015614	UP	--	--	GO:0044425//GO:0016021//GO:0031224//GO:0016020//GO:0005575	membrane part//integral component of membrane//intrinsic component of membrane//membrane//cellular_component	--	--	--	--	--	--
518	PGSC0003DMG400026500	13911.5	4841.17	1.5229	0.00010067	0.0015497	UP	GO:0071704//GO:0009765//GO:0044260//GO:0008152//GO:0015979//GO:0009987//GO:0043412//GO:0008150//GO:0043170//GO:0006464//GO:0044237//GO:0044238//GO:0036211//GO:0019538//GO:0044267//GO:0006091//GO:0019684//GO:0018298	organic substance metabolic process//photosynthesis, light harvesting//cellular macromolecule metabolic process//metabolic process//photosynthesis//cellular process//macromolecule modification//biological_process//macromolecule metabolic process//cellular protein modification process//cellular metabolic process//primary metabolic process//protein modification process//protein metabolic process//c…	GO:0031984//GO:0043227//GO:0016020//GO:0032991//GO:0005575//GO:0043231//GO:0005737//GO:0009507//GO:0043226//GO:0009579//GO:0034357//GO:0044436//GO:0009536//GO:0098796//GO:0031976//GO:0044435//GO:0009535//GO:0044422//GO:0016021//GO:0043229//GO:0044446//GO:0044425//GO:0055035//GO:0044424//GO:0042651//GO:0031224//GO:0044464//GO:0005622//GO:0005623//GO:0044444//GO:0009534//GO:0009521//GO:0044434//GO:…	organelle subcompartment//membrane-bounded organelle//membrane//protein-containing complex//cellular_component//intracellular membrane-bounded organelle//cytoplasm//chloroplast//organelle//thylakoid//photosynthetic membrane//thylakoid part//plastid//membrane protein complex//plastid thylakoid//plastid part//chloroplast thylakoid membrane//organelle part//integral component of membrane//intracellu…	GO:0003674//GO:0016168//GO:0046906//GO:0097159//GO:1901363//GO:0005488	molecular_function//chlorophyll binding//tetrapyrrole binding//organic cyclic compound binding//heterocyclic compound binding//binding	K08916 light-harvesting complex II chlorophyll a/b binding protein 5 | (RefSeq) chlorophyll a-b binding protein CP26, chloroplastic	http://www.genome.jp/dbget-bin/www_bget?sot:102584316	LHCB5	Chlorophyll A-B binding protein, plant||Chlorophyll A-B binding protein||Chlorophyll a/b binding protein domain
519	PGSC0003DMG400026586	201.091	69.6227	1.5302	0.0031231	0.023768	UP	GO:0055114//GO:0008150//GO:0008152	oxidation-reduction process//biological_process//metabolic process	GO:0005575//GO:0016020//GO:0031224//GO:0016021//GO:0044425	cellular_component//membrane//intrinsic component of membrane//integral component of membrane//membrane part	GO:0097159//GO:0016491//GO:1901363//GO:0003824//GO:0003674//GO:0043167//GO:0005506//GO:0046906//GO:0046914//GO:0043169//GO:0016705//GO:0020037//GO:0046872//GO:0005488//GO:0004497	organic cyclic compound binding//oxidoreductase activity//heterocyclic compound binding//catalytic activity//molecular_function//ion binding//iron ion binding//tetrapyrrole binding//transition metal ion binding//cation binding//oxidoreductase activity, acting on paired donors, with incorporation or reduction of molecular oxygen//heme binding//metal ion binding//binding//monooxygenase activity	no KO assigned | (RefSeq) cytochrome P450 72A15-like	http://www.genome.jp/dbget-bin/www_bget?sot:102603234	-	Cytochrome P450, conserved site||Cytochrome P450||Cytochrome P450, E-class, group I
[truncated: 194 more rows]
